1 **Inhibitory muscarinic acetylcholine receptors enhance**  
2 **aversive olfactory conditioning in adult *Drosophila***

3

4 Noa Bielopolski<sup>1</sup>, Hoger Amin<sup>2#</sup>, Anthi A. Apostolopoulou<sup>2#</sup>, Eyal Rozenfeld<sup>1#</sup>, Hadas  
5 Lerner<sup>1</sup>, Wolf Huetteroth<sup>3</sup>, Andrew C. Lin<sup>2†\*</sup>, Moshe Parnas<sup>1,4†\*</sup>

6 <sup>1</sup>Department of Physiology and Pharmacology, Sackler School of Medicine, Tel Aviv  
7 University, Tel Aviv 69978, Israel

8 <sup>2</sup>Department of Biomedical Science, University of Sheffield, Firth Court, Western Bank,  
9 Sheffield S10 2TN, UK

10 <sup>3</sup>Institute for Biology, University of Leipzig, Talstraße 33, 04103 Leipzig, Germany

11 <sup>4</sup>Sagol School of Neuroscience, Tel Aviv University, Tel Aviv 69978, Israel

12

13 #,†These authors contributed equally to this work

14 \*For correspondence: [mparnas@post.tau.ac.il](mailto:mparnas@post.tau.ac.il) (MP), [andrew.lin@sheffield.ac.uk](mailto:andrew.lin@sheffield.ac.uk) (ACL)

15

16 **Abstract**

17           Olfactory associative learning in *Drosophila* is mediated by synaptic plasticity  
18 between the Kenyon cells of the mushroom body and their output neurons. Both  
19 Kenyon cells and their inputs are cholinergic, yet little is known about the physiological  
20 function of muscarinic acetylcholine receptors in learning in adult flies. Here we show  
21 that aversive olfactory learning in adult flies requires type A muscarinic acetylcholine  
22 receptors (mAChR-A) specifically in the gamma subtype of Kenyon cells. Surprisingly,  
23 mAChR-A inhibits odor responses in both Kenyon cell dendrites and axons. Moreover,  
24 mAChR-A knockdown impairs the learning-associated depression of odor responses in  
25 a mushroom body output neuron. Our results suggest that mAChR-A is required at  
26 Kenyon cell presynaptic terminals to depress the synapses between Kenyon cells and  
27 their output neurons, and may suggest a role for the recently discovered axo-axonal  
28 synapses between Kenyon cells.

29

## 30 Introduction

31 Animals learn to modify their behavior based on past experience by changing  
32 connection strengths between neurons, and this synaptic plasticity often occurs through  
33 metabotropic receptors. In particular, neurons commonly express both ionotropic and  
34 metabotropic receptors for the same neurotransmitter, where the two may mediate  
35 different functions (e.g., direct excitation/inhibition vs. synaptic plasticity). In mammals,  
36 where glutamate is the principal excitatory neurotransmitter, metabotropic glutamate  
37 receptors (mGluRs) have been widely implicated in synaptic plasticity and memory  
38 (Jörntell and Hansel, 2006; Lüscher and Huber, 2010). Given the complexity of linking  
39 behavior to artificially induced plasticity in brain slices (Schonewille et al., 2011;  
40 Yamaguchi et al., 2016), it would be useful to study the role of metabotropic receptors in  
41 learning in a simpler genetic model system with a clearer behavioral readout of synaptic  
42 plasticity. One such system is *Drosophila*, where powerful genetic tools and well-defined  
43 anatomy have yielded a detailed understanding of the circuit and molecular  
44 mechanisms underlying associative memory (Busto et al., 2010; Cognigni et al., 2017;  
45 Hige, 2017). The principal excitatory neurotransmitter in *Drosophila* is acetylcholine, but,  
46 surprisingly, little is known about the function of metabotropic acetylcholine signaling in  
47 synaptic plasticity or neuromodulation in *Drosophila*. Here we address this question  
48 using olfactory associative memory.

49 Flies can learn to associate an odor (conditioned stimulus, CS) with a positive  
50 (sugar) or a negative (electric shock) unconditioned stimulus (US), so that they later  
51 approach 'rewarded' odors and avoid 'punished' odors. This association is thought to be  
52 formed in the presynaptic terminals of the ~2,000 Kenyon cells (KCs) that make up the  
53 mushroom body (MB), the fly's olfactory memory center (Busto et al., 2010; Cognigni et  
54 al., 2017; Hige, 2017). These KCs are activated by odors via second-order olfactory  
55 neurons called projection neurons (PNs). Each odor elicits responses in a sparse  
56 subset of KCs (Campbell et al., 2013; Lin et al., 2014) so that odor identity is encoded in  
57 which KCs respond to each odor. When an odor (CS) is paired with reward/punishment  
58 (US), an odor-specific set of KCs is activated at the same time that dopaminergic  
59 neurons (DANs) release dopamine onto KC presynaptic terminals. The coincident

60 activation causes long-term depression (LTD) of synapses from the odor-activated KCs  
61 onto mushroom body output neurons (MBONs) that lead to approach or avoidance  
62 behavior (Aso and Rubin, 2016; Aso et al., 2014b; Cohn et al., 2015; Hige et al., 2015b;  
63 Oswald et al., 2015; Perisse et al., 2016; Séjourné et al., 2011). In particular, training  
64 specifically depresses KC-MBON synapses of the ‘wrong’ valence (e.g., odor-  
65 punishment pairing depresses odor responses of MBONs that lead to approach  
66 behavior), because different pairs of ‘matching’ DANs/MBONs (e.g.  
67 punishment/approach, reward/avoidance) innervate distinct regions along KC axons  
68 (Aso et al., 2014a). Yet recent studies show that the mushroom body contains not just  
69 KC->MBON and DAN->KC synapses, but also KC->DAN, DAN->MBON and even KC-  
70 >KC synapses (Cervantes-Sandoval et al., 2017; Eichler et al., 2017; Takemura et al.,  
71 2017), suggesting that this model may be incomplete.

72 Both MB input (PNs) and output (KCs) are cholinergic (Barnstedt et al., 2016;  
73 Yasuyama and Salvaterra, 1999), and KCs express both ionotropic (nicotinic) and  
74 metabotropic (muscarinic) acetylcholine receptors (Croset et al., 2018; Davie et al.,  
75 2018). The nicotinic receptors mediate fast excitatory synaptic currents (Su and  
76 O’Dowd, 2003), while the physiological function of the muscarinic receptors is unknown.  
77 Muscarinic acetylcholine receptors (mAChRs) are G-protein coupled receptors; out of  
78 the three mAChRs in *Drosophila* (mAChR-A, mAChR-B and mAChR-C), mAChR-A  
79 (also called Dm1, mAChR-60C or mAChR) is the most closely homologous to mammalian  
80 mAChRs (Collin et al., 2013). Mammalian mAChRs are typically divided between ‘M<sub>1</sub>-  
81 type’ (M<sub>1</sub>/M<sub>3</sub>/M<sub>5</sub>), which signal via G<sub>q</sub> and are generally excitatory, and ‘M<sub>2</sub>-type’  
82 (M<sub>2</sub>/M<sub>4</sub>), which signal via G<sub>i/o</sub> and are generally inhibitory (Caulfield and Birdsall, 1998).  
83 *Drosophila* mAChR-A seems to use ‘M<sub>1</sub>-type’ signaling: when heterologously expressed  
84 in Chinese hamster ovary (CHO) cells, it signals via G<sub>q</sub> protein (Collin et al., 2013; Ren  
85 et al., 2015) to activate phospholipase C, which produces inositol trisphosphate to  
86 release Ca<sup>2+</sup> from internal stores.

87 Recent work indicates that mAChR-A is required for aversive olfactory learning in  
88 *Drosophila* larvae, as knocking down mAChR-A expression in KCs impairs learning  
89 (Silva et al., 2015). However, it is unclear whether mAChR-A is involved in olfactory

90 learning in adult *Drosophila*, given that mAChR-A is thought to signal through G<sub>q</sub>, and in  
91 adult flies G<sub>q</sub> signaling downstream of the dopamine receptor Damb promotes  
92 forgetting, not learning (Berry et al., 2012; Himmelreich et al., 2017). Moreover, it is  
93 unknown how mAChR-A affects the activity or physiology of KCs, where it acts (at KC  
94 axons or dendrites or both), and how these effects contribute to olfactory learning.

95 Here we show that mAChR-A is required in KCs for aversive olfactory learning in  
96 adult *Drosophila*. Surprisingly, genetic and pharmacological manipulations of mAChR-A  
97 suggest that mAChR-A is inhibitory and acts in part on KC axons. Moreover, mAChR-A  
98 knockdown impairs the learning-associated depression of odor responses in a key MB  
99 output neuron, MB-MVP2. We suggest that mAChR-A is required to depress synapses  
100 between KCs and their outputs.

101

## 102 **Results**

### 103 **mAChR-A expression in KCs is required for aversive olfactory learning in adult** 104 **flies**

105 *Drosophila* larvae with reduced mAChR-A expression in KCs show impaired  
106 aversive olfactory learning (Silva et al., 2015), but it remains unknown whether mAChR-  
107 A in KCs also functions in learning in adult flies. We addressed this question by  
108 knocking down mAChR-A expression in KCs using two UAS-RNAi lines, “RNAi 1” and  
109 “RNAi 2” (see Methods). Only RNAi 2 requires co-expression of Dicer-2 (Dcr-2) for  
110 optimal knockdown. To test the efficiency of these RNAi constructs, we expressed them  
111 pan-neuronally using elav-GAL4 and measured their effects on mAChR-A expression  
112 levels using quantitative real time polymerase chain reaction (qRT-PCR). Both RNAi  
113 lines strongly reduce mAChR-A levels (RNAi 1: 36±4% of elav-GAL4 control, i.e.,  
114 64±4% below normal; RNAi 2: 34±2% of normal; mean±s.e.m.; see **Figure 1A**). We  
115 then examined whether knocking down mAChR-A in KCs using the pan-KC driver  
116 OK107-GAL4 affects short term aversive conditioning in adult flies. We used the  
117 standard training protocol and odors used in the field (i.e. 3-octanol, OCT, and 4-  
118 methylcyclohexanol, MCH; see Methods). Under these conditions both UAS-RNAi

119 transgenes significantly reduced aversive conditioning (**Figure 1B,C** and **Figure S1A**).  
120 Knocking down mAChR-A had no effect on naive avoidance of MCH and OCT (**Figure**  
121 **1D**; see Methods) or flies' reaction to electric shock (**Figure S1B**), showing that the  
122 defect was specific to learning, rather than reflecting a failure to detect odors or shock.

123         Given that mAChR-A is expressed in the larval MB and indeed contributes to  
124 aversive conditioning in larvae, it is possible that developmental effects underlie the  
125 reduced learning observed in mAChR-A KD flies. To test this, we used tub-GAL80<sup>ts</sup> to  
126 suppress RNAi 1 expression during development. Flies were grown at 23°C until 3 days  
127 after eclosion and were then transferred to 31°C for 7 days. Adult-only knockdown of  
128 mAChR-A in KCs reduced learning (**Figure 1E**), just as constitutive knockdown did,  
129 indicating that mAChR-A plays a physiological, not purely developmental, role in  
130 aversive conditioning. To further verify that GAL80<sup>ts</sup> efficiently blocks RNAi expression  
131 (i.e., that GAL80<sup>ts</sup> is not leaky), flies were grown at 23°C without transferring them to  
132 31°C, thus blocking RNAi expression also in adults. When tested for learning at 10 days  
133 old, these flies showed normal learning (**Figure 1E**).

134

### 135 **mAChR-A is required for olfactory learning in $\gamma$ KCs, not $\alpha\beta$ or $\alpha'\beta'$ KCs**

136         Kenyon cells are subdivided into three main classes:  $\gamma$  neurons project to the  
137 horizontal lobes only, while the axons of  $\alpha\beta$  and  $\alpha'\beta'$  neurons bifurcate to form the  $\alpha$  and  
138  $\alpha'$  portions of the vertical lobes and the  $\beta$  and  $\beta'$  portions of the horizontal lobes. These  
139 different classes play different roles in olfactory conditioning (Güven-Ozkan and Davis,  
140 2014; Krashes et al., 2007). To unravel in which class(es) mAChR-A functions, we used  
141 a Minos-mediated integration cassette (MiMIC) line to investigate where mAChR-A is  
142 expressed (Venken et al., 2011). The MiMIC insertion in mAChR-A lies in the first 5'  
143 non-coding intron, creating a gene trap where GFP in the MiMIC cassette should be  
144 expressed in whichever cells endogenously express mAChR-A. Because the GFP in the  
145 original mAChR-A MiMIC cassette produced very little fluorescent signal (data not  
146 shown), we used recombinase-mediated cassette exchange (RMCE) to replace the  
147 original MiMIC cassette with a MiMIC cassette containing GAL4 (Venken et al., 2011).  
148 These new mAChR-A-MiMIC-GAL4 flies should express GAL4 wherever mAChR-A is

149 endogenously expressed. To reveal the expression pattern of mAChR-A, we crossed  
150 mAChR-A-MiMIC-GAL4 and 20xUAS-eGFP flies. mAChR-A-MiMIC-GAL4 drove GFP  
151 expression throughout the brain, consistent with previous reports (Blake et al., 1993;  
152 Croset et al., 2018; Davie et al., 2018; Hannan and Hall, 1996) and with the fact that the  
153 *Drosophila* brain is mostly cholinergic. In the mushroom bodies, GFP was expressed in  
154 the  $\alpha\beta$  and  $\gamma$  lobes, but not the  $\alpha'\beta'$  lobes (**Figure 2A**). No GFP signal was observed  
155 with an inverted insertion where GAL4 is inserted in the MiMIC locus in the wrong  
156 direction (data not shown). Consistent with these MiMIC results, two recently reported  
157 databases of single-cell transcriptomic analysis of the *Drosophila* brain (Croset et al.,  
158 2018; Davie et al., 2018) confirm that mAChR-A is more highly expressed in  $\alpha\beta$  and  $\gamma$   
159 KCs than in  $\alpha'\beta'$  KCs (**Figure S2**).

160 The higher expression of mAChR-A in  $\alpha\beta$  and  $\gamma$  KCs compared to  $\alpha'\beta'$  KCs  
161 suggests that learning would be impaired by mAChR-A knockdown in  $\alpha\beta$  or  $\gamma$ , but not  
162  $\alpha'\beta'$ , KCs. To test this, we expressed mAChR-A RNAi in different KC classes. As  
163 expected, aversive olfactory learning was reduced by knocking down mAChR-A in  $\alpha\beta$   
164 and  $\gamma$  KCs together using MB247-GAL4, but not by knockdown in  $\alpha'\beta'$  KCs using c305a-  
165 GAL4. To examine if  $\alpha\beta$  and  $\gamma$  KCs both participate in the reduced learning observed in  
166 mAChR-A knockdown flies, we sought to limit mAChR-A RNAi expression to either  $\alpha\beta$   
167 or  $\gamma$  neurons. While strong driver lines exist for  $\alpha\beta$  neurons, the  $\gamma$  GAL4 drivers we  
168 tested were fairly weak (H24-GAL4, MB131B, R45H04-GAL4, data not shown), perhaps  
169 too weak to drive mAChR-A-RNAi enough to knock down mAChR-A efficiently.  
170 Therefore, we used MB247-GAL4, which was strong enough to affect behavior, and  
171 blocked GAL4 activity in either  $\alpha\beta$  or  $\gamma$  KCs by expressing the GAL80 repressor under  
172 the control of R44E04-LexA ( $\alpha\beta$  KCs) or R45H04-LexA ( $\gamma$  KCs) (Bräcker et al., 2013).  
173 These combinations drove strong, specific expression in  $\alpha\beta$  or  $\gamma$  KCs (**Figure S3**).  
174 Learning was reduced by mAChR-A RNAi expression in  $\gamma$ , but not  $\alpha\beta$ , KCs (**Figure 2B**).  
175 These results suggest that mAChR-A is specifically required in  $\gamma$  KCs for aversive  
176 olfactory learning and short-term memory.

177

178 **mAChR-A suppresses odor responses in  $\gamma$  KCs**

179 We next asked what effect mAChR-A knockdown has on the physiology of KCs,  
180 by expressing GCaMP6f and mAChR-A RNAi 2 together in KCs using OK107-GAL4.  
181 Knocking down mAChR-A in KCs increased odor-evoked  $\text{Ca}^{2+}$  influx in the mushroom  
182 body calyx, where KC dendrites reside (**Figure 3**). This result is somewhat surprising  
183 because mAChR-A is a  $G_q$  coupled receptor whose activation leads to  $\text{Ca}^{2+}$  release  
184 from internal stores (Ren et al., 2015), which predicts that mAChR-A knockdown should  
185 decrease, not increase, odor-evoked  $\text{Ca}^{2+}$  influx in KCs. However, some examples have  
186 been reported of inhibitory signaling through  $G_q$  by  $M_1$ -type mAChRs (see Discussion),  
187 and *Drosophila* mAChR-A may join these as another example of an inhibitory mAChR  
188 signaling through  $G_q$ .

189 Because mAChR-A is required for aversive learning in  $\gamma$  KCs, not  $\alpha\beta$  or  $\alpha'\beta'$  KCs  
190 (**Figure 2**), we next asked if odor responses in  $\alpha\beta$ ,  $\alpha'\beta'$  and  $\gamma$  KCs are differentially  
191 affected by mAChR-A knockdown.  $\alpha\beta$ ,  $\alpha'\beta'$  and  $\gamma$  KC dendrites are not clearly  
192 segregated in the calyx, so we examined odor responses in the axonal lobes. Indeed,  
193 although odor responses in all lobes were increased by mAChR-A knockdown, only in  
194 the  $\gamma$  lobe was the effect statistically significant for both MCH and OCT (**Figure 3**). This  
195 result is consistent with the behavioral requirement for mAChR-A only in  $\gamma$  KCs.  
196 However, we do not rule out the possibility that mAChR-A knockdown affects  $\alpha\beta$  and  
197  $\alpha'\beta'$  odor responses in a more subtle way that does not affect short-term memory,  
198 especially as  $\alpha\beta$  and  $\alpha'\beta'$  odor responses were somewhat, though non-significantly,  
199 increased.

200 Do increased odor responses in  $\gamma$  KCs prevent learning by increasing the overlap  
201 between the  $\gamma$  KC population representations of the two odors used in our task (Lin et  
202 al., 2014)? When GCaMP6f and mAChR-A-RNAi 2 were expressed in all KCs, mAChR-  
203 A knockdown did not affect the sparseness or inter-odor correlation of KC population  
204 odor responses (**Figure 4A-C**) even though it increased overall calyx responses. To  
205 focus specifically on  $\gamma$  KCs, we expressed GCaMP6f and mAChR-A-RNAi 1 only in  $\gamma$   
206 KCs, using mb247-Gal4, R44E04-LexA and lexAop-GAL80, as in **Figure 2B**. GCaMP6f  
207 was visible mainly in the  $\gamma$  lobe (**Figure 4D**).  $\gamma$ -only expression of mAChR-A-RNAi 1  
208 increased odor responses in the calyx (here, dendrites of  $\gamma$  KCs only) and, in the case



209 of OCT, in the  $\gamma$  lobe (**Figure 4E,F**). Note that  $\gamma$  KC odor responses are increased by  
210 both RNAi 1 (**Figure 3A,B**) and RNAi 2 (**Figure 4E,F**). As with pan-KC expression,  $\gamma$ -  
211 only expression of mAChR-A-RNAi 1 did not affect the sparseness or inter-odor  
212 correlation of  $\gamma$  KCs (**Figure 4G-I**). Thus, mAChR-A knockdown does not impair  
213 learning through increased overlap in KC population odor representations.

214

### 215 **KC odor responses are decreased by an mAChR agonist**

216 RNAi-based knockdown of mAChR-A might induce homeostatic compensation  
217 that obscures or even reverses the primary effect of reduced mAChR-A expression. To  
218 test the acute role of mAChR-A in regulating KC activity, we took the complementary  
219 approach of pharmacologically activating mAChR-A. Initially we bath-applied 10  $\mu$ M  
220 muscarine, an mAChR-A agonist (*Drosophila* mAChR-B is 1000-fold less sensitive to  
221 muscarine than mAChR-A is (Collin et al., 2013), and mAChR-C is not expressed in the  
222 brain (Davie et al., 2018)). Muscarine strongly decreased odor responses in all subtypes  
223 of KCs (**Figure 5A,B**). However, muscarine did not significantly affect odor responses in  
224 PNs (**Figure 5C**), suggesting that the effect of muscarine on KCs arose in KCs, not  
225 earlier in the olfactory pathway. KCs can be silenced by an inhibitory GABAergic neuron  
226 called the anterior paired lateral (APL) neuron (Lin et al., 2014; Masuda-Nakagawa et  
227 al., 2014; Papadopoulou et al., 2011), so we asked whether muscarine reduces KC  
228 odor responses indirectly by activating APL, rather than directly inhibiting KCs. We  
229 applied muscarine to flies with APL-specific expression of tetanus toxin (TNT), which  
230 blocks inhibition from APL and thereby greatly increases KC odor responses. In these  
231 flies, APL is labeled stochastically, so hemispheres where APL was unlabeled served  
232 as controls (Lin et al., 2014) (see Methods). Muscarine decreased KC odor responses  
233 both in control hemispheres and hemispheres where APL synaptic output was blocked  
234 by tetanus toxin (**Figure 5D**), and the effect of muscarine was not significantly different  
235 between the two cases (**Figure 5E**). This result indicates that muscarine does not act  
236 solely by activating APL or by enhancing inhibition on KCs (e.g., increasing membrane  
237 localization of GABA<sub>A</sub> receptors).

238 To further clarify whether muscarine directly affects KC axons, we locally applied  
239 muscarine to the MB horizontal lobe by pressure ejection (**Figure 6**). Red dye included  
240 in the ejected solution confirmed that the muscarine did not spread to the calyx (**Figure**  
241 **6B**). In the absence of odor stimuli, locally applied muscarine on the horizontal lobe  
242 decreased GCaMP6f signal in the  $\beta$  and  $\gamma$  lobes during the period 0.5 – 1.5 s after  
243 application, suggesting that mAChR-A reduces baseline  $Ca^{2+}$  levels in some KCs  
244 (**Figure 6A,C**). Interestingly, in  $\alpha'\beta'$  KCs, local muscarine application caused a slower  
245 rise in GCaMP6f signal at 3 – 4 s after application (**Figure 6A,D**), suggesting that  
246 mAChR-A has different effects in different KCs or on different timescales. To test  
247 whether locally applied muscarine also modulates odor-evoked  $Ca^{2+}$  influx, we applied  
248 muscarine 1 s before odor onset. Locally applied muscarine decreased KC odor  
249 responses for both odors in the  $\gamma$  and  $\beta$  lobes, and for OCT in all lobes (**Figure 6F,G**).  
250 The more obvious effect with OCT might arise from OCT activating more KCs than  
251 MCH does (i.e., MCH responses were sparser: **Figure 4B, Table S1**), consistent with  
252 previous reports (Lin et al., 2014; Perisse et al., 2013). Although the red dye suggests  
253 that muscarine applied to the horizontal lobe did not spread substantially to the vertical  
254 ( $\alpha$  and  $\alpha'$ ) lobes (**Figure 6B**), these lobes may have been affected in the case of OCT  
255 because muscarine reached KC axons at the branch point. Notably, with only one  
256 exception, locally applied muscarine had no effect on either GCaMP6f signal or odor  
257 responses on the opposite hemisphere from the site of application (**Figure 6G**); nor did  
258 muscarine applied on the horizontal lobe affect GCaMP6f signal in the calyx (**Figure**  
259 **6A**). In the case of OCT, during muscarine application to the horizontal lobe, odor  
260 responses in the calyx were lower on both the same side and opposite side, but given  
261 that the opposite side was affected in no other case, this exception may reflect sensory  
262 adaptation between the 'before' and '+muscarine' recordings, rather than an effect of  
263 muscarine *per se*. Together, these results suggest that mAChR-A acts on KC axons to  
264 inhibit local  $Ca^{2+}$  influx.

265 To test what effect mAChR-A exerts on the calyx, we locally applied muscarine to  
266 the calyx. Surprisingly, applying muscarine to the calyx in the absence of odor stimuli  
267 increased GCaMP signal in the calyx and  $\alpha$  lobe (**Figure 6A,E**). It also decreased  
268 GCaMP signal in the  $\alpha'$  and  $\beta'$  lobes around 1–2 s after application (**Figure 6A**),

269 although this effect was not statistically significant. The increased  $\text{Ca}^{2+}$  in the calyx most  
270 likely did not reflect increased excitability, as applying muscarine to the calyx did not  
271 increase the calyx odor response (**Figure 6F,G**). If anything, it likely *decreased* the  
272 calyx odor response, because the  $\text{Ca}^{2+}$  increase induced by muscarine alone (no odor)  
273 lasted ~6–7 s and thus would have continued into the odor pulse in the muscarine +  
274 odor condition. If the odor response was unaffected by muscarine, the muscarine-  
275 evoked and odor-evoked increases in GCaMP6f signal should have summed. Instead,  
276 the peak calyx  $\Delta F/F$  during the odor pulse was the same before and after locally  
277 applying muscarine, suggesting that the specifically odor-evoked increase in GCaMP6f  
278 was decreased by muscarine. Indeed, applying muscarine to the calyx suppressed odor  
279 responses in KC axons (**Figure 6F,G**). Given that calyx muscarine suppresses  $\alpha'\beta'$   
280 axonal odor responses, the decrease in  $\alpha'\beta'$  KC GCaMP signal in the absence of odor  
281 likely reflects suppression of spontaneous action potentials (**Figure 6A,E**), as  $\alpha'\beta'$  KCs  
282 have the highest spontaneous spike rate out of the three subtypes (Groschner et al.,  
283 2018; Turner et al., 2008). The increase in calyx  $\text{Ca}^{2+}$  induced by muscarine alone  
284 (without odor) might reflect  $\text{Ca}^{2+}$  release from internal stores triggered by  $G_q$  signaling,  
285 which then inhibits KC excitability (thus smaller odor responses). Note that muscarine  
286 on the calyx is unlikely to reduce KC odor responses via presynaptic inhibition of PNs,  
287 because bath muscarine does not affect PN odor responses in the calyx (**Figure 5C**),  
288 although we cannot rule out  $\text{Ca}^{2+}$ -independent inhibition. Interestingly, KC axons in  
289 many cases show opposite responses to local muscarine application in the horizontal  
290 lobe vs. the calyx (e.g.,  $\alpha'\beta'$  and  $\gamma$  KCs in **Figure 6A**), suggesting that mAChR-A may  
291 act via different signaling pathways in KC dendrites and axons.

292

### 293 **mAChR-A knockdown prevents training-induced depression of MBON odor** 294 **responses**

295 The finding that muscarine can locally inhibit  $\text{Ca}^{2+}$  influx in KC axons suggests  
296 that mAChR-A may play a role in the weakening of KC->MBON synapses that underlies  
297 olfactory learning. For example, mAChR-A might be required in KC presynaptic  
298 terminals to integrate the US (shock) and CS (odor) to induce synaptic plasticity. If so,

299 increasing the strength of the US might overcome the aversive learning defect in  
300 mAChR-A knockdown flies. In contrast, if mAChR-A functions only in dendrites and  
301 modulates how KCs process the CS, not the US or CS-US integration, changing the US  
302 strength should not affect the learning defect in mAChR-A knockdown flies. We tested  
303 this by increasing the electric shock strength from 50 V (as in **Figure 1A**) to 90 V  
304 (**Figure 7A**). Indeed, increased electric shock strength improved learning (compare  
305 scores in **Figure 7A** with **Figure 1A**). In particular, mAChR-A knockdown flies no longer  
306 show any learning defect. As only the US input to KC presynaptic terminals was  
307 modified while the CS (i.e. odor input to the calyx) was unchanged, this result is  
308 consistent with the hypothesis that mAChR-A exerts its effect on learning and memory  
309 at KC presynaptic terminals. This result also backs up the imaging results in **Figure 4**  
310 showing that mAChR-A knockdown does not affect KC odor coding (i.e., the sparseness  
311 or inter-odor correlation of KC population responses).

312 We sought to further test whether mAChR-A contributes to the synaptic plasticity  
313 underlying aversive olfactory learning. In *Drosophila*, olfactory associative memories are  
314 stored by weakening the synapses between KCs and output neurons that lead to the  
315 “wrong” behavior. For example, aversive memory requires an output neuron  
316 downstream of  $\gamma$  KCs, called MBON- $\gamma$ 1pedc $\alpha/\beta$  or MB-MVP2. MB-MVP2 leads to  
317 approach behavior, and aversive conditioning reduces MB-MVP2’s responses to the  
318 aversively-trained odor (Hige et al., 2015b; Perisse et al., 2016). We tested whether  
319 knocking down mAChR-A would prevent this depression. We knocked down mAChR-A  
320 in KCs using OK107-GAL4 and UAS-mAChR-A-RNAi 1, and expressed GCaMP6f in  
321 MB-MVP2 using R12G04-LexA and lexAop-GCaMP6f (**Figure 7B**). We trained flies in  
322 the behavior apparatus and then imaged MB-MVP2 odor responses (3 h after training to  
323 avoid cold-shock-sensitive memory). Because overall response amplitudes were  
324 variable across flies, for each fly we measured the ratio of the response to MCH (the  
325 trained odor) over the response to OCT (the untrained odor). Consistent with previous  
326 published results (Hige et al., 2015b; Perisse et al., 2016), in control flies not expressing  
327 mAChR-A RNAi, the MCH/OCT ratio was substantially reduced in trained flies relative  
328 to mock-trained flies (**Figure 7C**). This was not because the OCT response increased,  
329 because there was no difference between trained and mock-trained flies in the ratio of

330 the response to OCT over the response to isoamyl acetate, a ‘reference’ odor that was  
331 absent in the training protocol. In contrast, in flies expressing mAChR-A RNAi in KCs,  
332 the MCH/OCT ratio was the same between trained and mock-trained flies (**Figure 7C**),  
333 indicating that the mAChR-A knockdown impaired the learning-related depression of the  
334 KC to MB-MVP2 synapse. These results support the notion that mAChR-A plays a role  
335 at the presynaptic terminal of KCs where LTD occurs.

336

## 337 **Discussion**

338 Here we show that mAChR-A is required in  $\gamma$  KCs for aversive olfactory learning  
339 and short-term memory in adult *Drosophila*. Knocking down mAChR-A increases KC  
340 odor responses, while the mAChR-A agonist muscarine suppresses KC activity at both  
341 KC dendrites and axons. Knocking down mAChR-A prevents aversive learning from  
342 reducing responses of the MB output neuron MB-MVP2 to the conditioned odor,  
343 suggesting that mAChR-A is required for the learning-related depression of KC->MBON  
344 synapses.

345 Why is mAChR-A only required for learning in  $\gamma$  KCs, not  $\alpha\beta$  or  $\alpha'\beta'$  KCs?  
346 Although our mAChR-A MiMIC gene trap agrees with single-cell transcriptome analysis  
347 that  $\alpha'\beta'$  KCs express less mAChR-A than do  $\gamma$  and  $\alpha\beta$  KCs (Croset et al., 2018; Davie  
348 et al., 2018), transcriptome analysis indicates that  $\alpha'\beta'$  KCs do express some mAChR-A  
349 (**Figure S2**). Moreover,  $\gamma$  and  $\alpha\beta$  KCs express similar levels of mAChR-A. It may be that  
350 the RNAi knockdown is less efficient at affecting the physiology of  $\alpha\beta$  and  $\alpha'\beta'$  KCs than  
351  $\gamma$  KCs, whether because the knockdown is less efficient at reducing protein levels, or  
352 because  $\alpha\beta$  and  $\alpha'\beta'$  KCs have different intrinsic properties or a different function of  
353 mAChR-A such that 30% of normal mAChR-A levels is sufficient in  $\alpha\beta$  and  $\alpha'\beta'$  KCs but  
354 not  $\gamma$  KCs. This interpretation is supported by our finding that mAChR-A RNAi  
355 knockdown significantly increases odor responses only in the  $\gamma$  lobe, not the  $\alpha\beta$  or  $\alpha'\beta'$   
356 lobes. Alternatively,  $\gamma$ ,  $\alpha\beta$  and  $\alpha'\beta'$  KCs are thought to be important mainly for short-term  
357 memory, long-term memory, and memory consolidation, respectively (Güven-Ozkan  
358 and Davis, 2014; Krashes et al., 2007); as we only tested short-term memory, mAChR-  
359 A may carry out the same function in all KCs, but only its role in  $\gamma$  KCs is required for

360 short-term (as opposed to long-term) memory. Indeed, the key plasticity gene DopR1 is  
361 required in  $\gamma$ , not  $\alpha\beta$  or  $\alpha'\beta'$  KCs, for short-term memory (Qin et al., 2012).

362 mAChR-A seems to inhibit KC odor responses, because knocking down mAChR-A  
363 A increases odor responses in the calyx and  $\gamma$  lobe, while activating mAChR-A with bath  
364 or local application of muscarine decreases KC odor responses. Some details differ  
365 between the genetic and pharmacological results. In particular, while mAChR-A  
366 knockdown mainly affects  $\gamma$  KCs, with other subtypes inconsistently affected, bath  
367 application of muscarine reduces responses in all KC subtypes, and local axonal  
368 application of muscarine reduces responses in the  $\gamma$  and  $\beta$  lobe (for MCH) or all lobes  
369 (for OCT). What explains these differences? mAChR-A might be weakly activated in  
370 physiological conditions, in which case gain of function would cause a stronger effect  
371 than loss of function. Similarly, pharmacological activation of mAChR-A is likely a more  
372 drastic manipulation than a two-thirds reduction of mAChR-A mRNA levels. Although we  
373 cannot entirely rule out network effects from muscarine application, the effect of  
374 muscarine does not stem from PNs or APL (**Figure 5C,D**) and locally applied muscarine  
375 would have little effect on neurons outside the mushroom body. A previous report found  
376 that local application of ACh at the horizontal lobe did not affect GCaMP5 signal in KC  
377 axons, but this experiment may have missed the small dip in GCaMP6f signal ( $\sim -5-10\%$   
378  $\Delta F/F$  in the  $\gamma$  lobe), and could not have measured modulation of odor responses as it  
379 was done *ex vivo* (Barnstedt et al., 2016).

380 How does mAChR-A inhibit odor-evoked  $Ca^{2+}$  influx in KCs? Given that mAChR-A  
381 A signals through  $G_q$  when expressed in CHO cells (Ren et al., 2015), that muscarinic  
382  $G_q$  signaling normally increases excitability in mammals (Caulfield and Birdsall, 1998),  
383 and that pan-neuronal artificial activation of  $G_q$  signaling in *Drosophila* larvae increases  
384 overall excitability (Becnel et al., 2013), it may be surprising that mAChR-A inhibits KCs.  
385 However,  $G_q$  signaling may exert different effects on different neurons in the fly brain,  
386 and some examples exist of inhibitory  $G_q$  signaling by mammalian mAChRs.  $M_1/M_3/M_5$   
387 receptors acting via  $G_q$  can inhibit voltage-dependent  $Ca^{2+}$  channels (Gamper et al.,  
388 2004; Kammermeier et al., 2000; Keum et al., 2014; Suh et al., 2010), reduce voltage-  
389 gated  $Na^+$  currents (Cantrell et al., 1996), or trigger surface transport of KCNQ

390 channels (Jiang et al., 2015), thus increasing inhibitory K<sup>+</sup> currents. *Drosophila* mAChR-  
391 A may inhibit KCs through similar mechanisms.

392           What function does mAChR-A serve in learning and memory? Our results  
393 indicate that mAChR-A knockdown prevents the learning-associated weakening of KC-  
394 MBON synapses, in particular for MBON- $\gamma$ 1pedc> $\alpha/\beta$ , aka MB-MVP2 (**Figure 7**). One  
395 potential explanation is that the increased odor-evoked Ca<sup>2+</sup> influx observed in  
396 knockdown flies increases synaptic release, which overrides the learning-associated  
397 synaptic depression. However, increased odor-evoked Ca<sup>2+</sup> influx *per se* is unlikely on  
398 its own to straightforwardly explain a learning defect, because other genetic  
399 manipulations that increase odor-evoked Ca<sup>2+</sup> influx in KCs either have no effect on, or  
400 even improve, olfactory learning. For example, knocking down GABA synthesis in the  
401 inhibitory APL neuron increases odor-evoked Ca<sup>2+</sup> influx in KCs (Lei et al., 2013; Lin et  
402 al., 2014) and improves olfactory learning (Liu and Davis, 2008).

403           Alternatively, mAChR-A may be involved directly in learning-associated synaptic  
404 depression. In mammals, where the principal excitatory neurotransmitter is glutamate  
405 (vs. ACh in *Drosophila*), metabotropic glutamate receptors (mGluRs) underlie many  
406 forms of LTD (Lüscher and Huber, 2010), most notably at the synapse between parallel  
407 fibers and Purkinje cells in the cerebellum, where LTD is thought to underlie motor  
408 learning (Jörntell and Hansel, 2006). The mushroom body has many architectural  
409 similarities to the cerebellum, and the KC-MBON synapse appears to fulfill an  
410 analogous role to the parallel fiber–Purkinje cell synapse (Farris, 2011). Using a  
411 metabotropic receptor for the main excitatory neurotransmitter to mediate synaptic  
412 depression may be yet another conserved feature of this ‘cerebellum-like’ circuit.  
413 Although LTD occurs postsynaptically at the parallel-fiber–Purkinje cell synapse and  
414 presynaptically at the KC-MBON synapse, mGluRs can also mediate presynaptic LTD  
415 (Pinheiro and Mulle, 2008). In addition, mAChRs are also involved in synaptic plasticity  
416 and memory in mammals. M<sub>1</sub> mAChR knockout mice have impaired synaptic plasticity  
417 and altered memory (Anagnostaras et al., 2003), and M<sub>1</sub> mAChRs together with  
418 metabotropic glutamate receptors mediate LTD in the hippocampus (Jo et al., 2010;  
419 Kamsler et al., 2010; Volk et al., 2007). It may be that mAChR-A similarly co-operates

420 with dopamine receptors to depress KC-MBON synapses. Note that the impaired  
421 synaptic depression in mAChR-A knockdown flies could explain the increased odor  
422 responses in KC axons. KC-MBON synapses are modulated by individual flies'  
423 experiences before their physiology can be measured experimentally, a phenomenon  
424 that requires the plasticity gene *rutabaga* (Hige et al., 2015a). If such plasticity involves  
425 depression of KC-MBON synapses and is impaired in mAChR-A knockdown flies, that  
426 could explain why mAChR-A knockdown flies have increased odor-evoked  $Ca^{2+}$  influx in  
427 KC axons. Regardless, mAChR-A likely also inhibits KCs directly, given that muscarine  
428 inhibits  $Ca^{2+}$  influx in KCs on a time scale of  $\sim 1$  s.

429         What role might mAChR-A play in synaptic plasticity? An intriguing possibility is  
430 suggested by an apparent paradox: both mAChR-A and the dopamine receptor Damb  
431 signal through  $G_q$  (Himmelreich et al., 2017), but mAChR-A promotes learning while  
432 Damb promotes forgetting (Berry et al., 2012). How can  $G_q$  mediate apparently opposite  
433 effects? Perhaps  $G_q$  signaling aids both learning and forgetting by generally rendering  
434 the synapse more labile. Indeed, although *damb* mutants retain memories for longer  
435 than wildtype, their initial learning is slightly impaired (Berry et al., 2012); *damb* mutant  
436 larvae are also impaired in aversive olfactory learning (Selcho et al., 2009). Although  
437 one study reports that knocking down  $G_q$  in KCs did not impair initial memory  
438 (Himmelreich et al., 2017), the  $G_q$  knockdown may not have been strong enough; also,  
439 that study shocked flies with 90 V shocks, which also gives normal learning in mAChR-  
440 A knockdown flies (**Figure 7A**).

441         For mAChR-A to contribute to KC-MBON synaptic depression, which is thought  
442 to occur in KC presynaptic terminals, mAChR-A must act at least in part at KC  
443 presynaptic terminals. An axonal site of action is supported by our finding that local  
444 muscarine application on the horizontal lobe decreases GCaMP6f signal and odor  
445 responses in KC axons, including those of  $\gamma$  KCs, the subtype of KCs where mAChR-A  
446 is required for learning. Mammalian mAChRs often mediate presynaptic inhibition, most  
447 commonly by  $M_2$ -type mAChRs (Allen and Brown, 1993; Bellingham and Berger, 1996;  
448 Slutsky et al., 1999) but also in some cases by  $M_1$ -type mAChRs (de Vin et al., 2015;  
449 Kamsler et al., 2010; Sheridan and Sutor, 1990). *Drosophila* mAChR-A may combine



450 the signaling pathway of M<sub>1</sub>-type mAChRs (G<sub>q</sub> rather than G<sub>i/o</sub>) with inhibitory action  
451 more typical of M<sub>2</sub>-type mAChRs.

452           What is the source of ACh which activates mAChR-A and modulates odor  
453 responses? In the calyx, cholinergic PNs are certainly a major source of ACh. However,  
454 KCs themselves are cholinergic (Barnstedt et al., 2016) and release neurotransmitter in  
455 both the calyx and lobes (Christiansen et al., 2011). In the lobes, KCs are the only  
456 known source of ACh, as cholinergic MBONs do not have presynaptic specializations in  
457 the MB and non-KC intrinsic MB neurons like APL and DPM are not thought to be  
458 cholinergic (Haynes et al., 2015; Wu et al., 2013). Thus, mAChRs could function as  
459 autoreceptors to prevent excess release of an excitatory neurotransmitter, as in  
460 mammals, where metabotropic glutamate receptors mediate presynaptic inhibition on  
461 glutamatergic neurons to prevent excess glutamate release (Scanziani et al., 1997).  
462 However, mAChRs may also mediate lateral interactions between KCs. Numerous KC-  
463 KC synapses have been seen by electron microscopy both in *Drosophila* (Takemura et  
464 al., 2017) and other insects (Leitch and Laurent, 1996; Schürmann, 2016; Strausfeld  
465 and Li, 1999). Thus, mAChR-A may mediate lateral inhibition, in conjunction with the  
466 lateral inhibition provided by the GABAergic APL neuron (Lin et al., 2014), or KC-KC  
467 signaling may enhance memory by aiding LTD via mAChR-A.

468

## 469 **Methods**

### 470 ***Fly Strains***

471 Fly strains (see below) were raised on cornmeal agar under a 12 h light/12 h dark  
472 cycle and studied 1–10 days post-eclosion. Strains were cultivated at 25 °C unless they  
473 expressed temperature-sensitive gene products (GAL80<sup>ts</sup>); in these cases the  
474 experimental animals and all relevant controls were grown at 23 °C. To de-repress the  
475 expression of RNAi with GAL80<sup>ts</sup>, experimental and control animals were incubated at  
476 31 °C for 7 days. Subsequent behavioral experiments were performed at 25 °C.

477 Experimental animals carried transgenes over Canton-S chromosomes where  
478 possible to minimize genetic differences between strains. The following transgenes  
479 were used: *UAS-GCaMP6f*, *lexAop-GCaMP6f* (Barnstedt et al., 2016; Chen et al.,  
480 2013), *UAS-mAChR-A RNAi 1* (TRiP.JF02725, Bloomington #27571), *UAS-mAChR-A*  
481 *RNAi 2* (VDRC ID 101407), *UAS-Dcr-2* (Bloomington #24651), *lexAop-GAL80*  
482 (Bloomington #32216), *tub-GAL80<sup>ts</sup>* (McGuire et al., 2003), *mb247-dsRed*  
483 (Riemensperger et al., 2005), *GH146-GAL4* (Stocker et al., 1997), *OK107-GAL4*  
484 (Connolly et al., 1996), *c305a-GAL4* (Krashes et al., 2007), *mb247-GAL4* (Zars, 2000),  
485 *R44E04-LexA* (Bloomington #52736), *R45H04-LexA* (Bräcker et al., 2013), *R12G04-*  
486 *LexA* (Bloomington #52448) (Jenett et al., 2012), *elav-GAL4* (Lin and Goodman, 1994),  
487 *NP2631-GAL4*, *GH146-FLP*, *tub-FRT-GAL80-FRT*, *UAS-TNT*, *UAS-mCherry*, *mb247-*  
488 *LexA* (Lin et al., 2014), *20xUAS-6xGFP* (Shearin et al., 2014), *UAS-mCD8-GFP*.

### 489 ***Behavioral Analysis***

490 Behavioral experiments were performed in a custom-built, fully automated  
491 apparatus (Claridge-Chang et al., 2009; Lin et al., 2014; Parnas et al., 2013). Single  
492 flies were housed in clear polycarbonate chambers (length 50 mm, width 5 mm, height  
493 1.3 mm) with printed circuit boards (PCBs) at both floors and ceilings. Solid-state relays  
494 (Panasonic AQV253) connected the PCBs to a 50 V source.

495 Air flow was controlled with mass flow controllers (CMOSens PerformanceLine,  
496 Sensirion). A carrier flow (2.7 l/min) was combined with an odor stream (0.3 l/min)  
497 obtained by circulating the air flow through vials filled with a liquid odorant. Odors were

498 prepared at 10 fold dilution in mineral oil. Therefore, liquid dilution and mixing carrier  
499 and odor stimulus stream resulted in a final 100 fold dilution of odors. Fresh odors were  
500 prepared daily.

501 The 3 liter/min total flow (carrier and odor stimulus) was split between 20  
502 chambers resulting in a flow rate of 0.15 l/min per half chamber. Two identical odor  
503 delivery systems delivered odors independently to each half of the chamber. Air or odor  
504 streams from the two halves of the chamber converged at a central choice zone. The 20  
505 chambers were stacked in two columns each containing 10 chambers and were backlit  
506 by 940 nm LEDs (Vishay TSAL6400). Images were obtained by a MAKO CMOS  
507 camera (Allied Vision Technologies) equipped with a Computar M0814-MP2 lens. The  
508 apparatus was operated in a temperature-controlled incubator (Panasonic MIR-154)  
509 maintained at 25 °C.

510 A virtual instrument written in LabVIEW 7.1 (National Instruments) extracted fly  
511 position data from video images and controlled the delivery of odors and electric  
512 shocks. Data were analyzed in MATLAB 2015b (The MathWorks) and Prism 6  
513 (GraphPad).

514 A fly's preference was calculated as the percentage of time that it spent on one  
515 side of the chamber. Training and odor avoidance protocols were as depicted in **Figure**  
516 **1**. The naïve avoidance index was calculated as (preference for left side when it  
517 contains air) – (preference for left side when it contains odor). During training, MCH was  
518 paired with 12 equally spaced 1.25 s electric shocks at 50 V (Tully and Quinn, 1985).  
519 The learning index was calculated as (preference for MCH before training) –  
520 (preference for MCH after training). Flies were excluded from analysis if they entered  
521 the choice zone fewer than 4 times during odor presentation.

## 522 ***Functional Imaging***

523 Brains were imaged by two-photon laser-scanning microscopy (Ng et al., 2002;  
524 Wang et al., 2003). Cuticle and trachea in a window overlying the required area were  
525 removed, and the exposed brain was superfused with carbogenated solution (95% O<sub>2</sub>,  
526 5% CO<sub>2</sub>) containing 103 mM NaCl, 3 mM KCl, 5 mM trehalose, 10 mM glucose, 26 mM

527  $\text{NaHCO}_3$ , 1 mM  $\text{NaH}_2\text{PO}_4$ , 3 mM  $\text{CaCl}_2$ , 4 mM  $\text{MgCl}_2$ , 5 mM N-Tris (TES), pH 7.3.  
528 Odors at  $10^{-1}$  dilution were delivered by switching mass-flow controlled carrier and  
529 stimulus streams (Sensirion) via software controlled solenoid valves (The Lee  
530 Company). Flow rates at the exit port of the odor tube were 0.5 or 0.8 l/min.

531 Fluorescence was excited by a Ti-Sapphire laser centered at 910 nm, attenuated  
532 by a Pockels cell (Conoptics) and coupled to a galvo-resonant scanner. Excitation light  
533 was focussed by a 20X, 1.0 NA objective (Olympus XLUMPLFLN20XW), and emitted  
534 photons were detected by GaAsP photomultiplier tubes (Hamamatsu Photonics,  
535 H10770PA-40SEL), whose currents were amplified and transferred to the imaging  
536 computer. Two imaging systems were used, #1 for **Figures 3-6** except **5C**, and #2 for  
537 **Figure 5C** and **Figure 7**, which differed in the following components: laser (1: Mai Tai  
538 eHP DS, 70 fs pulses; 2: Mai Tai HP DS, 100 fs pulses; both from Spectra-Physics);  
539 microscope (1: Movable Objective Microscope; 2: DF-Scope installed on an Olympus  
540 BX51WI microscope; both from Sutter); amplifier for PMT currents (1: Thorlabs TIA-60;  
541 2: Hamamatsu HC-130-INV); software (1: ScanImage 5; 2: MScan 2.3.01). Volume  
542 imaging on System 1 was performed using a piezo objective stage (nPFocus400,  
543 nPoint). Muscarine was applied locally by pressure ejection from patch pipettes  
544 (resistance  $\sim 10$  MOhm; capillary inner diameter 0.86 mm, outer diameter 1.5 mm;  
545 concentration in pipette 20 mM; pressure 12.5 psi) using a Picospritzer III (Parker). A  
546 red dye was added to the pipette to visualize the ejected fluid (SeTau-647, SETA  
547 BioMedicals) (Podgorski et al., 2012).

548 Movies were motion-corrected in X-Y using the moco ImageJ plugin (Dubbs et  
549 al., 2016), with pre-processing to collapse volume movies in Z and to smooth the image  
550 with a Gaussian filter (standard deviation = 4 pixels; the displacements generated from  
551 the smoothed movie were then applied to the original, unsmoothed movie), and motion-  
552 corrected in Z by maximizing the pixel-by-pixel correlation between each volume and  
553 the average volume across time points.  $\Delta F/F$ , activity maps, sparseness and inter-odor  
554 correlation were calculated as in (Lin et al., 2014). We excluded non-responsive flies  
555 and flies whose motion could not be corrected.

## 556 ***Structural Imaging***

557 Brain dissections, fixation, and immunostaining were performed as described  
558 (Pitman et al., 2011; Wu and Luo, 2006). To visualize native GFP fluorescence,  
559 dissected brains were fixed in 4% (w/v) paraformaldehyde in PBS (1.86 mM NaH<sub>2</sub>PO<sub>4</sub>,  
560 8.41 mM Na<sub>2</sub>HPO<sub>4</sub>, 175 mM NaCl) and fixed for 20 min at room temperature. Samples  
561 were washed for 3×20 min in PBS containing 0.3% (v/v) Triton-X-100 (PBT). The  
562 neuropil was counterstained with nc82 (DSHB) and goat anti-mouse Alexa 647 or Alexa  
563 564. Primary antisera were applied for 1-2 days and secondary antisera for 1-2 days in  
564 PBT at 4 °C, followed by embedding in Vectashield. Images were collected on a Leica  
565 TCS SP5, SP8, or Nikon A1 confocal microscope and processed in ImageJ.

566 APL expression of tetanus toxin was scored by widefield imaging of mCherry.  
567 mCherry expression in APL was distinguished from 3XP3-driven dsRed from the  
568 GH146-FLP transgene by using separate filter cubes for dsRed (49004, Chroma:  
569 545/25 excitation; 565 dichroic; 605/70 emission) and mCherry (LED-mCherry-A-000,  
570 Semrock: 578/21 excitation; 596 dichroic; 641/75 emission).

## 571 **Statistics**

572 Statistical analyses were carried out in GraphPad Prism as described in figure  
573 legends and **Table S1**. In general, no statistical methods were used to predetermine  
574 sample sizes, but where conclusions were drawn from the absence of a statistically  
575 significant difference, a power analysis was carried out in G\*Power to confirm that the  
576 sample size provided sufficient power to detect an effect of the expected size. The  
577 experimenter was blind to which hemispheres had APL neurons expressing tetanus  
578 toxin before post-experiment dissection (**Figure 5**) but not otherwise.

579

## 580 **Acknowledgments**

581 We thank Vincent Croset, Christoph Treiber and Scott Waddell for sharing  
582 mAChR-A expression data before publication. We thank Oren Schuldiner, Andreas  
583 Thum, Scott Waddell, the Bloomington Stock Center, the Vienna *Drosophila* RNAi  
584 Center, and the Kyoto *Drosophila* Genetic Resource center for fly strains. We thank

585 Anton Nikolaev for comments on the manuscript. This work was supported by the  
586 European Research Council (676844, MP; 639489, AL).

587

## 588 **Author contributions**

589 NB: Methodology, investigation, formal analysis, writing–review & editing,  
590 visualization. HA: Methodology, investigation, formal analysis, writing–original draft,  
591 writing–review & editing, visualization. AAA: Methodology, investigation, formal analysis,  
592 writing–review & editing, visualization. ER: Methodology, investigation, formal analysis,  
593 software, writing–review & editing, visualization. HL: Investigation, formal analysis,  
594 writing–review & editing. WH: Investigation, writing–review & editing, visualization. ACL:  
595 Conceptualization, methodology, investigation, formal analysis, software, writing–  
596 original draft, writing–review & editing, visualization, supervision, funding acquisition.  
597 MP: Initiated the project, conceptualization, methodology, investigation, formal analysis,  
598 software, writing–original draft, writing–review & editing, visualization, supervision,  
599 funding acquisition.

600

601 **Figure legends**

602 **Figure 1: mAChR-A is required in the MB for short term aversive olfactory**  
603 **learning and memory but not for naïve behavior**

604 **(A)** qRT-PCR of mAChR-A with mAChR-A RNAi driven by elav-GAL4. The  
605 housekeeping gene eEF1 $\alpha$ 2 (eukaryotic translation elongation factor 1 alpha 2,  
606 CG1873) was used for normalization. Knockdown flies have ~30% of the control levels  
607 of mAChR-A mRNA (mean  $\pm$  SEM; number of biological replicates (left to right): 6, 7, 7,  
608 4, 4, each with 3 technical replicates; \*  $p < 0.05$ ; Kruskal-Wallis test with Dunn's multiple  
609 comparisons test). For detailed statistical analysis see **Table S1**.

610 **(B)** Each trace shows the movement of an individual fly during the training protocol, with  
611 fly position in the chamber (horizontal dimension) plotted against time (vertical  
612 dimension). Colored rectangles illustrate which odor is presented on each side of the  
613 chamber during training and testing. Flies were conditioned against MCH (blue  
614 rectangles; see Methods).

615 **(C)** Learning scores in flies with mAChR-A RNAi driven by OK107-GAL4. mAChR-A  
616 knockdown reduced learning scores compared to controls (mean  $\pm$  SEM, n (left to right):  
617 69, 69, 70, 71, 71, \*  $p < 0.05$ , \*\*  $p < 0.01$ ; Kruskal-Wallis test with Dunn's multiple  
618 comparisons test).

619 **(D)** mAChR-A KD flies show normal olfactory avoidance to OCT and MCH compared to  
620 their genotypic controls (mean  $\pm$  SEM, n (left to right): 68, 67, 58, 63, 91, 67,  $p = 0.82$   
621 for OCT,  $p = 0.64$  for MCH; Kruskal-Wallis test). Colored rectangles show stimulus  
622 protocol as in **(B)**; red for odor (MCH or OCT), white for air.

623 **(E)** Learning scores in flies with mAChR-A RNAi 1 driven by OK107-GAL4 with GAL80<sup>ts</sup>  
624 repression. Flies raised at 23 °C and heated to 31 °C as adults (red outlines) had  
625 impaired learning compared to controls. Control flies kept at 23 °C throughout (blue  
626 outline), thus blocking mAChR-A RNAi expression, showed no learning defects (mean  $\pm$   
627 SEM, n (left to right): 51, 41, 58, 51, \*\*  $p < 0.05$ , Kruskal-Wallis test with Dunn's multiple  
628 comparisons test). For detailed statistical analysis see **Table S1**.

629

630 **Figure 2: mAChR-A is required for short term aversive olfactory learning and**  
631 **memory in  $\gamma$  KCs**

632 **(A)** Maximum intensity projection of 70 confocal sections (2  $\mu$ m) through the central  
633 brain of a fly carrying MiMIC-mAChR-A-GAL4 and 20xUAS-6xGFP transgenes. MB  $\alpha\beta$   
634 and  $\gamma$  lobes are clearly observed. No GFP expression is observed in  $\alpha'\beta'$  lobes.

635 **(B)** mAChR-A RNAi 1 was targeted to different subpopulations of KCs. Learning scores  
636 were reduced compared to controls when mAChR-A RNAi 1 was expressed in  $\alpha\beta$  and  $\gamma$   
637 KCs or  $\gamma$  KCs alone, but not when mAChR-A RNAi 1 was expressed in  $\alpha\beta$  or  $\alpha'\beta'$  KCs.  
638 (mean  $\pm$  SEM, n (left to right): 69, 51, 70, 76, 69, 60, 68, 66, 71, \*\*\*  $p < 0.001$ , Kruskal-  
639 Wallis test with Dunn's multiple comparisons test). For detailed statistical analysis see  
640 **Table S1**. The data for the UAS-mAChR-A RNAi 1 control are duplicated from **Figure 1**.

641

642 **Figure 3: mAChR-A knockdown increases odor responses in  $\gamma$  KCs.**

643 Odor responses to MCH and OCT were measured in control (OK107-GAL4>GCaMP6f,  
644 Dcr-2) and knockdown (OK107-GAL4>GCaMP6f, Dcr-2, mAChR-A-RNAi 2) flies.

645 **(A)**  $\Delta F/F$  of GCaMP6f signal in different areas of the MB in control (black) and  
646 knockdown (red) flies, during presentation of odor pulses (horizontal lines). Data are  
647 mean (solid line)  $\pm$  SEM (shaded area). Diagrams illustrate which region of the MB was  
648 analyzed.

649 **(B)** Peak response of the traces presented in A (mean  $\pm$  SEM.) n given as number of  
650 hemispheres (number of flies) for control and knockdown flies, respectively: calyx, 23  
651 (13), 17 (10);  $\alpha$  and  $\alpha'$ , 24 (13), 20 (10);  $\beta$ ,  $\beta'$  and  $\gamma$ , 27 (14), 22 (11). \*  $p < 0.05$ , \*\*\*  $p <$   
652 0.001, 2-way ANOVA with Holm-Sidak multiple comparisons test). For detailed  
653 statistical analysis see **Table S1**.

654

655 **Figure 4: mAChR-A knockdown does not affect KC odor identity coding.**



656 **(A)** Example activity maps (single optical sections from a z-stack) of KC odor responses  
657 to MCH and OCT in control (OK107-GAL4>GCaMP6f, Dcr-2) and mAChR-A knockdown  
658 (OK107-GAL4>GCaMP6f, Dcr-2, mAChR-A-RNAi 2) flies where all KCs are imaged.  
659 False-coloring indicates  $\Delta F/F$  of the odor response, overlaid on grayscale baseline  
660 GCaMP6f signal. Scale bar, 10  $\mu\text{m}$ . For detailed statistical analysis see **Table S1**.

661 **(B)** Sparseness of pan-KC population responses is not affected by mAChR-A  
662 knockdown ( $p = 0.38$ , 2-way repeated-measures ANOVA).

663 **(C)** Correlation between pan-KC population responses to MCH and OCT is not affected  
664 by mAChR-A knockdown ( $p = 0.75$ , t-test).

665 **(D)** Upper: diagram of  $\gamma$  KCs (green). Lower: False-coloured average-intensity Z-  
666 projection of the horizontal lobe in a control fly imaged from a dorsal view in panel E  
667 (mb247-GAL4>GCaMP6f, R44E04-LexA>GAL80), averaged over 10 s before the odor  
668 stimulus. R44E04-LexA>GAL80 almost completely suppresses  $\beta$  lobe expression.  
669 Scale bar, 20  $\mu\text{m}$ .

670 **(E)** Knocking down mAChR-A only in  $\gamma$  KCs increases  $\gamma$  KC odor responses. Shown  
671 here are odor responses in the calyx and  $\gamma$  lobe of control (mb247-GAL4>GCaMP6f,  
672 R44E04-LexA>GAL80) and knockdown (mb247-GAL4>GCaMP6f, mAChR-A-RNAi 1,  
673 R44E04-LexA>GAL80) flies.

674 **(F)** Peak response of the traces presented in D (mean  $\pm$  SEM.) n given as number of  
675 hemispheres (number of flies): 11 (6) for control, 12 (6) for knockdown. \*  $p < 0.05$ , \*\*  $p <$   
676  $0.01$ , 2-way repeated-measures ANOVA with Holm-Sidak multiple comparisons test.

677 **(G)** Example activity maps (single optical sections from a z-stack) of  $\gamma$  KC odor  
678 responses to MCH and OCT in control (mb247-GAL4>GCaMP6f, R44E04-  
679 LexA>GAL80) and knockdown (mb247-GAL4>GCaMP6f, mAChR-A-RNAi 1, R44E04-  
680 LexA>GAL80) flies. Note the gaps in baseline GCaMP6f signal due to lack of  $\alpha\beta$  and  
681  $\alpha'\beta'$  KCs labeled. Scale bar, 10  $\mu\text{m}$

682 **(H)** Sparseness of  $\gamma$  KC population responses is not affected by mAChR-A knockdown  
683 ( $p = 0.76$ , 2-way repeated-measures ANOVA).

684 **(I)** Correlation between  $\gamma$  KC population responses to MCH and OCT is not affected by  
685 mAChR-A knockdown ( $p = 0.32$ , t-test).

686

687 **Figure 5: KC odor responses are decreased by muscarine.**

688 **(A)** Odor responses in the calyx and  $\gamma$  lobe of OK107-GAL4>GCaMP6f flies, before  
689 (black) and after (red) adding 10  $\mu$ M muscarine in the bath. Data are mean (solid line)  $\pm$   
690 SEM (shaded area); horizontal lines indicate the odor pulse. Traces for all lobes are  
691 shown in **Figure S4**. For detailed statistical analysis see **Table S1**.

692 **(B)** Peak  $\Delta F/F$  during the odor pulse before and after muscarine.  $n = 11$  hemispheres  
693 from 6 flies. \*  $p < 0.05$ , \*\*  $p < 0.01$ , \*\*\*  $p < 0.001$  by 2-way repeated measures ANOVA  
694 with Holm-Sidak multiple comparisons test.

695 **(C)** Odor responses in PN axons in the calyx are not affected by 10  $\mu$ M muscarine, in  
696 GH146-GAL4>GCaMP6f flies ( $p > 0.49$ , 2-way repeated measures ANOVA,  $n = 5$  flies).

697 **(D)** Peak  $\Delta F/F$  during the odor pulse before and after muscarine in control hemispheres  
698 where APL was unlabeled (left,  $n = 6$  hemispheres from 6 flies) and hemispheres where  
699 APL expressed tetanus toxin (TNT) (right,  $n = 6$  hemispheres from 5 flies). \*  $p < 0.05$ , \*\*  
700  $p < 0.01$ , \*\*\*  $p < 0.001$  by 2-way repeated measures ANOVA with Holm-Sidak multiple  
701 comparisons test.

702 **(E)** (Response (peak  $\Delta F/F$  during the odor pulse) after muscarine) / (response before  
703 muscarine), using data from **(D)**. No significant differences were observed ( $p > 0.05$ , 2-  
704 way repeated measures ANOVA with Holm-Sidak multiple comparisons test).

705

706 **Figure 6: Local muscarine application to the calyx and horizontal lobe**  
707 **differentially affects KC subtypes**

708 **(A)** Left: Schematic of MB, showing color scheme for the different regions where  
709 responses are quantified. Right: Average  $\Delta F/F$  GCaMP6f signal in different areas of the  
710 MB of OK107>GCaMP6f flies in response to a 10 ms pulse of 20 mM muscarine on the

711 horizontal lobe (left column) and the calyx (right column). Data are mean (solid line)  $\pm$   
712 SEM (shaded area). Dashed vertical line shows the timing of muscarine application.  
713 Gray and purple shaded bars indicate time windows used to quantify responses in panel  
714 **C-E**. n given as number of hemispheres (number of flies): 15 (8) for pulsing on the  
715 horizontal lobe, 7 (5) for calyx.

716 **(B)**  $\Delta F/F$  traces of red dye indicator, showing which MB regions the muscarine spread  
717 to. The traces follow the same color scheme and visuals as shown in panel A.

718 **(C-E)** Scatter plot showing average  $\Delta F/F$  of GCaMP6f signal of the different MB regions  
719 at time 0.5-1.5 s (**C**) and 3-4 s (**D**) following 10 ms pulse of 20 mM muscarine on the  
720 horizontal lobe or the calyx (**E**, time 0-1 s), quantified from traces shown in (**A**). Colors  
721 match the shaded time windows in **A**. n: 15 (8) for pulsing on the horizontal lobe, 7 (5)  
722 for calyx. \*  $p < 0.05$ , \*\*  $p < 0.01$ , one-sample t-test or Wilcoxon signed-rank test  
723 (different from 0), Bonferroni correction for multiple comparisons.

724 **(F)** Average  $\Delta F/F$  GCaMP6f signal of the calyx and  $\gamma$  lobe during odor pulses of OCT  
725 (horizontal bar), before (black) and after (red) muscarine application on the horizontal  
726 lobe (top), or the calyx (bottom), 1 s before the odor pulse (vertical bar). Data are mean  
727 (solid line)  $\pm$  SEM (shaded area). n: 12 (8) for pulsing on the horizontal lobe, 7 (5) for  
728 calyx. See **Figure S5** for all traces.

729 **(G)** Line-bar plots showing paired peak  $\Delta F/F$  GCaMP6f responses of the different MB  
730 regions during 5 s odor pulses of MCH or OCT, before (gray) and after (pink) muscarine  
731 application to the calyx or the horizontal lobe, in the hemisphere where the muscarine  
732 was applied (same side, right) or the opposite (opposite side, left). Muscarine was  
733 applied 1 s before the odor pulse. Bars show mean value. n: Horizontal lobe same side  
734 MCH 23 (15), OCT 22 (15), opposite side MCH 13 (7), OCT 13 (7). Calyx same side  
735 MCH 8 (6), OCT 10 (8), opposite side MCH 7 (5), OCT 7 (5). \*  $p < 0.05$ , \*\*  $p < 0.01$ , \*\*\*  
736  $p < 0.001$  by 2-way repeated measures ANOVA with Holm-Sidak multiple comparisons  
737 test. n differs between OCT horizontal lobe, same side vs. panel **F** because a scripting  
738 error meant that for 10 of the recordings, the odor pulse paired with muscarine  
739 presentation lasted 4 s, not 5 s. These data are included in **G**, because the peak  $\Delta F/F$

740 always occurred within the first 4 s of the odor pulse and thus was unaffected by the  
741 scripting error, but they are excluded from **F** because the stimuli do not match.

742

743 **Figure 7: mAChR-A KD prevents aversive conditioning from decreasing the**  
744 **response to the trained odor in MB-MVP2**

745 **(A)** When flies were conditioned against MCH using 90 V electric shock (see Methods),  
746 driving mAChR-A RNAi in KCs using OK107-GAL4 did not affect learning compared to  
747 controls (mean  $\pm$  SEM, n (left to right): 52, 49, 51,  $p > 0.13$ , Kruskal-Wallis test). For  
748 detailed statistical analysis see **Table S1**.

749 **(B)** Diagram of genotype: mAChR-A RNAi 1 was expressed in KCs with OK107 (gray),  
750 while GCaMP6f was expressed in MB-MVP2 with R12G04-LexA (green). The imaging  
751 plane is shown in blue.

752 **(C)** Odor responses in MB-MVP2 to isoamyl acetate (IAA, not presented during  
753 training), OCT (not shocked during training) and MCH (shocked during training), in  
754 control (OK107-GAL4, R12G04-LexA>GCaMP6f, mb247-dsRed) and knockdown  
755 (OK107-GAL4>mAChR-A-RNAi 1, R12G04-LexA>GCaMP6f, mb247-dsRed) flies, with  
756 mock training (no shock) or training against MCH. Traces show mean (solid line)  $\pm$  SEM  
757 (shaded area).

758 **(D)** MCH:OCT or OCT:IAA ratios of peak  $\Delta F/F$  values from **(C)**.  $n = 5$ . \*  $p < 0.05$ , Mann-  
759 Whitney test. Power analysis shows that  $n = 5$  would suffice to detect an effect as  
760 strong as the difference between training and mock training in the MCH:OCT ratio, with  
761 power 0.9.

762

763 **Figure S1: Mock trained flies do not change odor preference over the course of**  
764 **the training protocol**

765 **(A)** Flies were subjected to the same protocol as in Figure 1 but without electric shock.  
766 As expected the flies do not change their odor preference and have a learning index

767 which is not statistically different from 0 (n (left to right): 79, 73, 71;  $p > 0.3$ , one-sample  
768 t-test). For detailed statistical analysis see **Table S1**.

769 **(B)** Sensitivity to shock (extent to which flies walk faster while being shocked) is not  
770 affected by knocking down mAChR-A in KCs. Shown here is walking speed during  
771 training (time = 5-6 and 7-8 min in Figure 1B), taking the difference between speed  
772 during MCH (CS+) and speed during OCT (CS-). In mock training, the difference is  
773 close to zero, but during training, when MCH is paired with shock, flies walk much faster  
774 in MCH (\*  $p < 0.05$ , \*\*  $p < 0.01$ , \*\*\*  $p < 0.001$ , Mann-Whitney test with Bonferroni  
775 correction, comparing training vs. mock training). The effect of shock is not significantly  
776 different between OK107 alone and OK107>mAChR-A-RNAi flies (n.s.:  $p = 0.44$  for  
777 interaction between genotype and training vs. mock training, 2-way ANOVA). n (left to  
778 right): 79, 99, 79, 79, 139, 159.

779

780 **Figure S2: Expression of mAChR-A from single-cell transcriptome profiling.**

781 **(A)** Data from Davie et al., 2018. 56,902 *Drosophila* brain cells arranged according to  
782 their single-cell transcriptome profiles, along the top 2 principal components using t-  
783 SNE. Red coloring indicates expression of mAChR-A. KC subtype clusters are labeled  
784 as identified in Davie et al., 2018.

785 **(B)** Expression of *DAT* (marker for  $\alpha'\beta'$  KCs), *trio* (marker for  $\alpha'\beta'$  and  $\gamma$  KCs), and  
786 *mAChR-A* for cells identified as  $\alpha'\beta'$ ,  $\alpha\beta$  and  $\gamma$  KCs in Davie et al., 2018. mAChR-A  
787 expression is higher in  $\alpha\beta$  and  $\gamma$  KCs compared to  $\alpha'\beta'$  KCs.

788 **(C)** As in A but with data from Croset et al., 2018 (10,286 *Drosophila* brain cells).

789 **(D)** As in B but with data from Croset et al., 2018.

790 Images screenshotted and raw data downloaded from SCoPe (<http://scope.aertslab.org>)  
791 on 24 June 2018.

792

793 **Figure S3: Expression patterns of GAL4 and LexA driver lines used in this study.**

794 GFP expression was driven by the named GAL4 or LexA driver lines and the general  
795 neuropil was stained with an antibody to NC82 (magenta). Images are maximum-  
796 intensity Z-projections of confocal stacks. Panels A-D, G show only the planes of the  
797 mushroom body lobes and peduncle to more clearly show which lobes are labeled.

798 **(A)** OK107-GAL4 labels all KCs.

799 **(B)** MB247-GAL4 labels  $\alpha\beta$  and  $\gamma$  KCs.

800 **(C)** c305a-GAL4 labels  $\alpha'\beta'$  KCs.

801 **(D)** R44E04-LexA labels  $\alpha\beta$  KCs.

802 **(E)** R45H04-LexA strongly labels  $\gamma$  KCs.

803 **(F)** Silencing MB247-GAL4 expression in  $\gamma$  KCs by using R45H04-LexA to drive *lexAop-*  
804 *GAL80* in  $\gamma$  KCs results in fairly specific expression in  $\alpha\beta$  KCs.

805 **(G)** Silencing MB247-GAL4 expression in  $\alpha\beta$  KCs by using R44E04 to drive *lexAop-*  
806 *GAL80* in  $\alpha\beta$  KCs results in fairly specific expression in  $\gamma$  KCs.

807 **(H)** R12G04-GAL4 labels MBON- $\gamma$ 1pedc> $\alpha/\beta$ , aka MB-MVP2.

808

809 **Figure S4: Odor responses of all lobes are reduced by bath muscarine.**

810 Extended data for **Figure 5**. Odor responses in OK107-GAL4>GCaMP6f flies **(A)**,  
811 control APL unlabeled hemispheres **(B)**, and APL>TNT hemispheres **(C)**, before (black)  
812 and after (red) adding 10  $\mu$ M muscarine in the bath. Data are mean (solid line)  $\pm$  SEM  
813 (shaded area); diagrams illustrate which region of the MB was analyzed; horizontal lines  
814 indicate the odor pulse. These are the traces for the summary data shown in **Figure**  
815 **5B,D**.

816

817 **Figure S5: Muscarine differentially affects the MB regions when it is locally**  
818 **applied to the calyx or horizontal lobe.**

819 Average  $\Delta F/F$  GCaMP6f traces of the different MB regions of OK107>GCaMP6f flies  
820 that only received the muscarine pulse (**A**) or received an odor pulse (MCH or OCT)  
821 before (black) or after (red) 10 ms pulse of 20 mM muscarine (**B,C**). Panel **A** is  
822 duplicated from **Figure 6A**; panels **B,C** are the traces corresponding to the **Figure 6G**.  
823 Muscarine was applied either in the horizontal lobe or calyx, 1 s before the odor pulse  
824 where applicable. Traces are from the same side or the opposite side that muscarine  
825 was applied. Data are mean (solid line)  $\pm$  SEM (shaded area). Horizontal bars indicate  
826 odor pulse timing and duration. Vertical bars indicate timing of muscarine pulse. n, by  
827 number of hemispheres (number of flies): Horizontal lobe same side MCH 13 (8), OCT  
828 12 (8), opposite side MCH 6 (3), OCT 6 (3), muscarine alone 15 (8) . Calyx same side  
829 MCH 6 (4), OCT 7 (5), opposite side MCH 5 (3), OCT 5 (3), muscarine alone 7 (5). n for  
830 odor + muscarine traces differs between this figure vs. **Figure 6G** because a scripting  
831 error meant that for 10 of the recordings, the odor pulse paired with muscarine  
832 presentation lasted 4 s, not 5 s. These data are included in **Figure 6G**, because the  
833 peak  $\Delta F/F$  always occurred within the first 4 s of the odor pulse and thus was unaffected  
834 by the scripting error, but they are excluded from traces shown in this figure because  
835 the stimuli do not match.

836

837 **Table S1. Details of statistical analysis.**

838

839 **Table S2. Detailed genotypes used in this study.**

840

## 841 **References**

842 Allen, T.G., and Brown, D.A. (1993). M2 muscarinic receptor-mediated inhibition of the  
843  $Ca^{2+}$  current in rat magnocellular cholinergic basal forebrain neurones. *J. Physiol.*  
844 (Lond.) 466, 173–189.

845 Anagnostaras, S.G., Murphy, G.G., Hamilton, S.E., Mitchell, S.L., Rahnema, N.P.,  
846 Nathanson, N.M., and Silva, A.J. (2003). Selective cognitive dysfunction in acetylcholine  
847 M1 muscarinic receptor mutant mice. *Nat Neurosci* 6, 51–58.

- 848 Aso, Y., and Rubin, G.M. (2016). Dopaminergic neurons write and update memories  
849 with cell-type-specific rules. *Elife* 5, e16135.
- 850 Aso, Y., Hattori, D., Yu, Y., Johnston, R.M., Iyer, N.A., Ngo, T.-T.B., Dionne, H., Abbott,  
851 L.F., Axel, R., Tanimoto, H., et al. (2014a). The neuronal architecture of the mushroom  
852 body provides a logic for associative learning. *Elife* 3, e04577.
- 853 Aso, Y., Sitaraman, D., Ichinose, T., Kaun, K.R., Vogt, K., Belliard-Guérin, G., Plaçais,  
854 P.-Y., Robie, A.A., Yamagata, N., Schnaitmann, C., et al. (2014b). Mushroom body  
855 output neurons encode valence and guide memory-based action selection in  
856 *Drosophila*. *Elife* 3, e04580.
- 857 Barnstedt, O., Oswald, D., Felsenberg, J., Brain, R., Moszynski, J.-P., Talbot, C.B.,  
858 Perrat, P.N., and Waddell, S. (2016). Memory-Relevant Mushroom Body Output  
859 Synapses Are Cholinergic. *Neuron* 89, 1237–1247.
- 860 Becnel, J., Johnson, O., Majeed, Z.R., Tran, V., Yu, B., Roth, B.L., Cooper, R.L., Kerut,  
861 E.K., and Nichols, C.D. (2013). DREADDs in *Drosophila*: a pharmacogenetic approach  
862 for controlling behavior, neuronal signaling, and physiology in the fly. *Cell Rep* 4, 1049–  
863 1059.
- 864 Bellingham, M.C., and Berger, A.J. (1996). Presynaptic depression of excitatory  
865 synaptic inputs to rat hypoglossal motoneurons by muscarinic M2 receptors. *J.*  
866 *Neurophysiol.* 76, 3758–3770.
- 867 Berry, J.A., Cervantes-Sandoval, I., Nicholas, E.P., and Davis, R.L. (2012). Dopamine Is  
868 Required for Learning and Forgetting in *Drosophila*. *Neuron* 74, 530–542.
- 869 Blake, A.D., Anthony, N.M., Chen, H.H., Harrison, J.B., Nathanson, N.M., and Sattelle,  
870 D.B. (1993). *Drosophila* nervous system muscarinic acetylcholine receptor: transient  
871 functional expression and localization by immunocytochemistry. *Mol. Pharmacol.* 44,  
872 716–724.
- 873 Bräcker, L.B., Siju, K.P., Varela, N., Aso, Y., Zhang, M., Hein, I., Vasconcelos, M.L., and  
874 Kadow, I.C.G. (2013). Essential Role of the Mushroom Body in Context-Dependent  
875 CO<sub>2</sub> Avoidance in *Drosophila*. *Curr. Biol.* 1–7.
- 876 Busto, G.U., Cervantes-Sandoval, I., and Davis, R.L. (2010). Olfactory learning in  
877 *Drosophila*. *Physiology* 25, 338–346.
- 878 Campbell, R.A.A., Honegger, K.S., Qin, H., Li, W., Demir, E., and Turner, G.C. (2013).  
879 Imaging a population code for odor identity in the *Drosophila* mushroom body. *J.*  
880 *Neurosci.* 33, 10568–10581.
- 881 Cantrell, A.R., Ma, J.Y., Scheuer, T., and Catterall, W.A. (1996). Muscarinic modulation  
882 of sodium current by activation of protein kinase C in rat hippocampal neurons. *Neuron*  
883 16, 1019–1026.



- 884 Caulfield, M.P., and Birdsall, N.J.M. (1998). International Union of Pharmacology. XVII.  
885 Classification of Muscarinic Acetylcholine Receptors. *Pharmacol. Rev.* *50*, 279–290.
- 886 Cervantes-Sandoval, I., Phan, A., Chakraborty, M., and Davis, R.L. (2017). Reciprocal  
887 synapses between mushroom body and dopamine neurons form a positive feedback  
888 loop required for learning. *Elife* *6*.
- 889 Chen, T.-W., Wardill, T.J., Sun, Y., Pulver, S.R., Renninger, S.L., Baohan, A., Schreiter,  
890 E.R., Kerr, R.A., Orger, M.B., Jayaraman, V., et al. (2013). Ultrasensitive fluorescent  
891 proteins for imaging neuronal activity. *Nature* *499*, 295–300.
- 892 Christiansen, F., Zube, C., Andlauer, T.F.M., Wichmann, C., Fouquet, W., Oswald, D.,  
893 Mertel, S., Leiss, F., Tavosanis, G., Farca Luna, A.J., et al. (2011). Presynapses in  
894 Kenyon Cell Dendrites in the Mushroom Body Calyx of *Drosophila*. *Journal of*  
895 *Neuroscience* *31*, 9696–9707.
- 896 Claridge-Chang, A., Roorda, R.D., Vrontou, E., Sjulson, L., Li, H., Hirsh, J., and  
897 Miesenböck, G. (2009). Writing memories with light-addressable reinforcement circuitry.  
898 *Cell* *139*, 405–415.
- 899 Cognigni, P., Felsenberg, J., and Waddell, S. (2017). Do the right thing: neural network  
900 mechanisms of memory formation, expression and update in *Drosophila*. *Curr Opin*  
901 *Neurobiol* *49*, 51–58.
- 902 Cohn, R., Morantte, I., and Ruta, V. (2015). Coordinated and Compartmentalized  
903 Neuromodulation Shapes Sensory Processing in *Drosophila*. *Cell* *163*, 1742–1755.
- 904 Collin, C., Hauser, F., Gonzalez de Valdivia, E., de Valdivia, E.G., Li, S., Reisenberger,  
905 J., Carlsen, E.M.M., Khan, Z., Hansen, N.O., Puhm, F., et al. (2013). Two types of  
906 muscarinic acetylcholine receptors in *Drosophila* and other arthropods. *Cell. Mol. Life*  
907 *Sci.* *70*, 3231–3242.
- 908 Connolly, J.B., Roberts, I.J., Armstrong, J.D., Kaiser, K., Forte, M., Tully, T., and  
909 O’Kane, C.J. (1996). Associative learning disrupted by impaired Gs signaling in  
910 *Drosophila* mushroom bodies. *Science* *274*, 2104–2107.
- 911 Croset, V., Treiber, C.D., and Waddell, S. (2018). Cellular diversity in the *Drosophila*  
912 midbrain revealed by single-cell transcriptomics. *Elife* *7*, e34550.
- 913 Davie, K., Janssens, J., Koldere, D., De Waegeneer, M., Pech, U., Kreft, Ł., Aibar, S.,  
914 Makhzami, S., Christiaens, V., Bravo González-Blas, C., et al. (2018). A Single-Cell  
915 Transcriptome Atlas of the Aging *Drosophila* Brain. *Cell*.
- 916 de Vin, F., Choi, S.M., Bolognesi, M.L., and Lefebvre, R.A. (2015). Presynaptic M 3  
917 muscarinic cholinergic receptors mediate inhibition of excitatory synaptic transmission in area  
918 CA1 of rat hippocampus. *Brain Research*.
- 919 Dubbs, A., Guevara, J., and Yuste, R. (2016). moco: Fast Motion Correction for Calcium

- 920 Imaging. *Front Neuroinform* 10, 6.
- 921 Eichler, K., Li, F., Litwin-Kumar, A., Park, Y., Andrade, I., Schneider-Mizell, C.M.,  
922 Saumweber, T., Huser, A., Eschbach, C., Gerber, B., et al. (2017). The complete  
923 connectome of a learning and memory centre in an insect brain. *Nature* 548, 175–182.
- 924 Farris, S.M. (2011). Are mushroom bodies cerebellum-like structures? *Arthropod*  
925 *Structure and Development* 40, 368–379.
- 926 Gamper, N., Reznikov, V., Yamada, Y., Yang, J., and Shapiro, M.S. (2004).  
927 Phosphatidylinositol [correction] 4,5-bisphosphate signals underlie receptor-specific  
928 Gq/11-mediated modulation of N-type Ca<sup>2+</sup> channels. *J. Neurosci.* 24, 10980–10992.
- 929 Groschner, L.N., Chan Wah Hak, L., Bogacz, R., DasGupta, S., and Miesenböck, G.  
930 (2018). Dendritic Integration of Sensory Evidence in Perceptual Decision-Making. *Cell*  
931 173, 894–905.e13.
- 932 Guven-Ozkan, T., and Davis, R.L. (2014). Functional neuroanatomy of *Drosophila*  
933 olfactory memory formation. *Learning & Memory* 21, 519–526.
- 934 Hannan, F., and Hall, L.M. (1996). Temporal and spatial expression patterns of two G-  
935 protein coupled receptors in *Drosophila melanogaster*. *Invertebrate Neuroscience*.
- 936 Haynes, P.R., Christmann, B.L., and Griffith, L.C. (2015). A single pair of neurons links  
937 sleep to memory consolidation in *Drosophila melanogaster*. *Elife* 4.
- 938 Hige, T., Aso, Y., Rubin, G.M., and Turner, G.C. (2015a). Plasticity-driven  
939 individualization of olfactory coding in mushroom body output neurons. *Nature*.
- 940 Hige, T. (2017). What can tiny mushrooms in fruit flies tell us about learning and  
941 memory? *Neurosci. Res.*
- 942 Hige, T., Aso, Y., Modi, M.N., Rubin, G.M., and Turner, G.C. (2015b). Heterosynaptic  
943 Plasticity Underlies Aversive Olfactory Learning in *Drosophila*. *Neuron* 88, 985–998.
- 944 Himmelreich, S., Masuho, I., Berry, J.A., MacMullen, C., Skamangas, N.K.,  
945 Martemyanov, K.A., and Davis, R.L. (2017). Dopamine Receptor DAMB Signals via Gq  
946 to Mediate Forgetting in *Drosophila*. *Cell Rep* 21, 2074–2081.
- 947 Jenett, A., Rubin, G.M., Ngo, T.-T.B., Shepherd, D., Murphy, C., Dionne, H., Pfeiffer,  
948 B.D., Cavallaro, A., Hall, D., Jeter, J., et al. (2012). A GAL4-driver line resource for  
949 *Drosophila* neurobiology. *Cell Rep* 2, 991–1001.
- 950 Jiang, L., Kosenko, A., Yu, C., Huang, L., Li, X., and Hoshi, N. (2015). Activation of m1  
951 muscarinic acetylcholine receptor induces surface transport of KCNQ channels through  
952 a CRMP-2-mediated pathway. *J. Cell. Sci.* 128, 4235–4245.
- 953 Jo, J., Son, G.H., Winters, B.L., Kim, M.J., Whitcomb, D.J., Dickinson, B.A., Lee, Y.-B.,

- 954 Futai, K., Amici, M., Sheng, M., et al. (2010). Muscarinic receptors induce LTD of  
955 NMDAR EPSCs via a mechanism involving hippocalcin, AP2 and PSD-95. *Nat Neurosci*  
956 *13*, 1216–1224.
- 957 Jörntell, H., and Hansel, C. (2006). Synaptic memories upside down: bidirectional  
958 plasticity at cerebellar parallel fiber-Purkinje cell synapses. *Neuron* *52*, 227–238.
- 959 Kammermeier, P.J., Ruiz-Velasco, V., and Ikeda, S.R. (2000). A voltage-independent  
960 calcium current inhibitory pathway activated by muscarinic agonists in rat sympathetic  
961 neurons requires both Galpha q/11 and Gbeta gamma. *Journal of Neuroscience* *20*,  
962 5623–5629.
- 963 Kamsler, A., McHugh, T.J., Gerber, D., Huang, S.Y., and Tonegawa, S. (2010).  
964 Presynaptic m1 muscarinic receptors are necessary for mGluR long-term depression in  
965 the hippocampus. *Proc. Natl. Acad. Sci. USA* *107*, 1618–1623.
- 966 Keum, D., Baek, C., Kim, D.-I., Kweon, H.-J., and Suh, B.-C. (2014). Voltage-dependent  
967 regulation of CaV2.2 channels by Gq-coupled receptor is facilitated by membrane-  
968 localized  $\beta$  subunit. *J. Gen. Physiol.* *144*, 297–309.
- 969 Krashes, M.J., Keene, A.C., Leung, B., Armstrong, J.D., and Waddell, S. (2007).  
970 Sequential Use of Mushroom Body Neuron Subsets during *Drosophila* Odor Memory  
971 Processing. *Neuron* *53*, 103–115.
- 972 Lei, Z., Chen, K., Li, H., Liu, H., and Guo, A. (2013). The GABA system regulates the  
973 sparse coding of odors in the mushroom bodies of *Drosophila*. *Biochem. Biophys. Res.*  
974 *Commun.* *436*, 35–40.
- 975 Leitch, B., and Laurent, G. (1996). GABAergic synapses in the antennal lobe and  
976 mushroom body of the locust olfactory system. *J. Comp. Neurol.*
- 977 Lin, A.C., Bygrave, A.M., de Calignon, A., Lee, T., and Miesenböck, G. (2014). Sparse,  
978 decorrelated odor coding in the mushroom body enhances learned odor discrimination.  
979 *Nat Neurosci* *17*, 559–568.
- 980 Lin, D.M., and Goodman, C.S. (1994). Ectopic and increased expression of Fasciclin II  
981 alters motoneuron growth cone guidance. *Neuron* *13*, 507–523.
- 982 Liu, X., and Davis, R.L. (2008). The GABAergic anterior paired lateral neuron  
983 suppresses and is suppressed by olfactory learning. *Nat Neurosci* *12*, 53–59.
- 984 Lüscher, C., and Huber, K.M. (2010). Group 1 mGluR-dependent synaptic long-term  
985 depression: mechanisms and implications for circuitry and disease. *Neuron* *65*, 445–  
986 459.
- 987 Masuda-Nakagawa, L.M., Ito, K., Awasaki, T., and O'Kane, C.J. (2014). A single  
988 GABAergic neuron mediates feedback of odor-evoked signals in the mushroom body of  
989 larval *Drosophila*. *Front. Neural. Circuits* *8*.

- 990 McGuire, S.E., Le, P.T., Osborn, A.J., Matsumoto, K., and Davis, R.L. (2003).  
991 Spatiotemporal rescue of memory dysfunction in *Drosophila*. *Science* 302, 1765–1768.
- 992 Ng, M.M., Roorda, R.D.R., Lima, S.Q., Boris V BV Zemelman, Morcillo, P.P., and  
993 Miesenböck, G. (2002). Transmission of olfactory information between three  
994 populations of neurons in the antennal lobe of the fly. *Neuron* 36, 463–474.
- 995 Oswald, D., Felsenberg, J., Talbot, C.B., Das, G., Perisse, E., Huetteroth, W., and  
996 Waddell, S. (2015). Activity of defined mushroom body output neurons underlies  
997 learned olfactory behavior in *Drosophila*. *Neuron* 86, 417–427.
- 998 Papadopoulou, M., Cassenaer, S., Nowotny, T., and Laurent, G. (2011). Normalization  
999 for sparse encoding of odors by a wide-field interneuron. *Science* 332, 721–725.
- 1000 Parnas, M., Lin, A.C., Huetteroth, W., and Miesenböck, G. (2013). Odor discrimination  
1001 in *Drosophila*: from neural population codes to behavior. *Neuron* 79, 932–944.
- 1002 Perisse, E., Oswald, D., Barnstedt, O., Talbot, C.B., Huetteroth, W., and Waddell, S.  
1003 (2016). Aversive Learning and Appetitive Motivation Toggle Feed-Forward Inhibition in  
1004 the *Drosophila* Mushroom Body. *Neuron* 90, 1086–1099.
- 1005 Perisse, E., Yin, Y., Lin, A.C., Lin, S., Huetteroth, W., and Waddell, S. (2013). Different  
1006 Kenyon cell populations drive learned approach and avoidance in *Drosophila*. *Neuron*  
1007 79, 945–956.
- 1008 Pinheiro, P.S., and Mulle, C. (2008). Presynaptic glutamate receptors: physiological  
1009 functions and mechanisms of action. *Nat Rev Neurosci* 9, 423–436.
- 1010 Pitman, J.L., Huetteroth, W., Burke, C.J., Krashes, M.J., Lai, S.-L., Lee, T., and  
1011 Waddell, S. (2011). A pair of inhibitory neurons are required to sustain labile memory in  
1012 the *Drosophila* mushroom body. *Curr. Biol.* 21, 855–861.
- 1013 Podgorski, K., Terpetschnig, E., Klochko, O.P., Obukhova, O.M., and Haas, K. (2012).  
1014 Ultra-bright and -stable red and near-infrared squaraine fluorophores for in vivo two-  
1015 photon imaging. *PLoS ONE* 7, e51980.
- 1016 Qin, H., Cressy, M., Li, W., Coravos, J.S., Izzi, S.A., and Dubnau, J. (2012). Gamma  
1017 Neurons Mediate Dopaminergic Input during Aversive Olfactory Memory Formation in  
1018 *Drosophila*. *Curr. Biol.* 1–7.
- 1019 Ren, G.R., Folke, J., Hauser, F., Li, S., and Grimmelikhuijzen, C.J.P. (2015). The A- and  
1020 B-type muscarinic acetylcholine receptors from *Drosophila melanogaster* couple to  
1021 different second messenger pathways. *Biochem. Biophys. Res. Commun.* 462, 358–  
1022 364.
- 1023 Riemensperger, T., Völler, T., Stock, P., Buchner, E., and Fiala, A. (2005). Punishment  
1024 prediction by dopaminergic neurons in *Drosophila*. *Curr. Biol.* 15, 1953–1960.

- 1025 Scanziani, M., Salin, P.A., Vogt, K.E., Malenka, R.C., and Nicoll, R.A. (1997). Use-  
1026 dependent increases in glutamate concentration activate presynaptic metabotropic  
1027 glutamate receptors. *Nature* **385**, 630–634.
- 1028 Schonewille, M., Gao, Z., Boele, H.-J., Veloz, M.F.V., Amerika, W.E., Simek, A.A.M., De  
1029 Jeu, M.T., Steinberg, J.P., Takamiya, K., Hoebeek, F.E., et al. (2011). Reevaluating the  
1030 role of LTD in cerebellar motor learning. *Neuron* **70**, 43–50.
- 1031 Schürmann, F.-W. (2016). Fine structure of synaptic sites and circuits in mushroom  
1032 bodies of insect brains. *Arthropod Structure and Development* **45**, 399–421.
- 1033 Selcho, M., Pauls, D., Han, K.-A., Stocker, R.F., and Thum, A.S. (2009). The role of  
1034 dopamine in *Drosophila* larval classical olfactory conditioning. *PLoS ONE* **4**, e5897.
- 1035 Séjourné, J., Plaçais, P.-Y., Aso, Y., Siwanowicz, I., Trannoy, S., Thoma, V.,  
1036 Tedjakumala, S.R., Rubin, G.M., Tchénio, P., Ito, K., et al. (2011). Mushroom body  
1037 efferent neurons responsible for aversive olfactory memory retrieval in *Drosophila*. *Nat*  
1038 *Neurosci* **14**, 903–910.
- 1039 Shearin, H.K., Macdonald, I.S., Spector, L.P., and Stowers, R.S. (2014). Hexameric  
1040 GFP and mCherry reporters for the *Drosophila* GAL4, Q, and LexA transcription  
1041 systems. *Genetics* **196**, 951–960.
- 1042 Sheridan, R.D., and Sutor, B. (1990). Presynaptic M 1 muscarinic cholinceptors  
1043 mediate inhibition of excitatory synaptic transmission in the hippocampus in vitro.  
1044 *Neurosci. Lett.*
- 1045 Silva, B., Molina-Fernández, C., Ugalde, M.B., Tognarelli, E.I., Angel, C., and  
1046 Campusano, J.M. (2015). Muscarinic ACh Receptors Contribute to Aversive Olfactory  
1047 Learning in *Drosophila*. *Neural Plast.* **2015**, 1–10.
- 1048 Slutsky, I., Parnas, H., and Parnas, I. (1999). Presynaptic effects of muscarine on ACh  
1049 release at the frog neuromuscular junction. *J. Physiol. (Lond.)* **514 ( Pt 3)**, 769–782.
- 1050 Stocker, R.F., Heimbeck, G., Gendre, N., and de Belle, J.S. (1997). Neuroblast ablation  
1051 in *Drosophila* P[GAL4] lines reveals origins of olfactory interneurons. *J. Neurobiol.* **32**,  
1052 443–456.
- 1053 Strausfeld, N.J., and Li, Y. (1999). Representation of the calyces in the medial and  
1054 vertical lobes of cockroach mushroom bodies. *J. Comp. Neurol.* **409**, 626–646.
- 1055 Su, H., and O'Dowd, D.K. (2003). Fast synaptic currents in *Drosophila* mushroom body  
1056 Kenyon cells are mediated by alpha-bungarotoxin-sensitive nicotinic acetylcholine  
1057 receptors and picrotoxin-sensitive GABA receptors. *Journal of Neuroscience* **23**, 9246–  
1058 9253.
- 1059 Suh, B.-C., Leal, K., and Hille, B. (2010). Modulation of high-voltage activated Ca(2+)  
1060 channels by membrane phosphatidylinositol 4,5-bisphosphate. *Neuron* **67**, 224–238.

- 1061 Takemura, S.-Y., Aso, Y., Hige, T., Wong, A., Lu, Z., Xu, C.S., Rivlin, P.K., Hess, H.,  
1062 Zhao, T., Parag, T., et al. (2017). A connectome of a learning and memory center in the  
1063 adult *Drosophila* brain. *Elife* 6.
- 1064 Tully, T., and Quinn, W.G. (1985). Classical conditioning and retention in normal and  
1065 mutant *Drosophila melanogaster*. *J. Comp. Physiol. (a)* 157, 263–277.
- 1066 Turner, G.C., Bazhenov, M., and Laurent, G. (2008). Olfactory representations by  
1067 *Drosophila* mushroom body neurons. *J. Neurophysiol.* 99, 734–746.
- 1068 Venken, K.J.T., Schulze, K.L., Haelterman, N.A., Pan, H., He, Y., Evans-Holm, M.,  
1069 Carlson, J.W., Levis, R.W., Spradling, A.C., Hoskins, R.A., et al. (2011). MiMIC: a highly  
1070 versatile transposon insertion resource for engineering *Drosophila melanogaster* genes.  
1071 *Nat Methods* 8, 737–743.
- 1072 Volk, L.J., Pfeiffer, B.E., Gibson, J.R., and Huber, K.M. (2007). Multiple Gq-coupled  
1073 receptors converge on a common protein synthesis-dependent long-term depression  
1074 that is affected in fragile X syndrome mental retardation. *J. Neurosci.* 27, 11624–11634.
- 1075 Wang, J.W., Wong, A.M., Flores, J., Vosshall, L.B., and Axel, R. (2003). Two-photon  
1076 calcium imaging reveals an odor-evoked map of activity in the fly brain. *Cell* 112, 271–  
1077 282.
- 1078 Wu, C.-L., Shih, M.-F.M., Lee, P.-T., and Chiang, A.-S. (2013). An octopamine-  
1079 mushroom body circuit modulates the formation of anesthesia-resistant memory in  
1080 *Drosophila*. *Curr. Biol.* 23, 2346–2354.
- 1081 Wu, J.S., and Luo, L. (2006). A protocol for dissecting *Drosophila melanogaster* brains  
1082 for live imaging or immunostaining. *Nat Protoc* 1, 2110–2115.
- 1083 Yamaguchi, K., Itohara, S., and Ito, M. (2016). Reassessment of long-term depression  
1084 in cerebellar Purkinje cells in mice carrying mutated GluA2 C terminus. *Proc. Natl.*  
1085 *Acad. Sci. USA* 113, 10192–10197.
- 1086 Yasuyama, K., and Salvaterra, P.M. (1999). Localization of choline acetyltransferase-  
1087 expressing neurons in *Drosophila* nervous system. *Microsc. Res. Tech.* 45, 65–79.
- 1088 Zars, T. (2000). Localization of a Short-Term Memory in *Drosophila*. *Science* 288, 672–  
1089 675.
- 1090

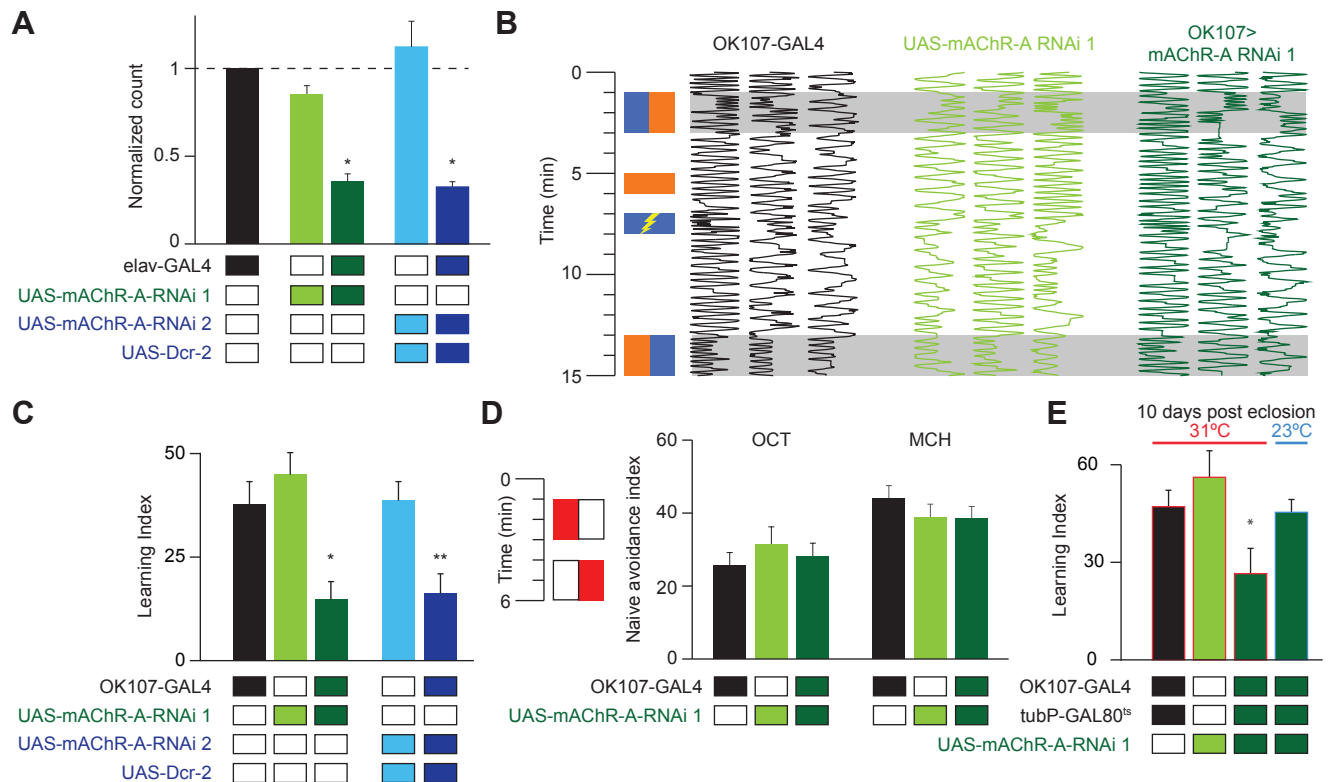

### Figure 1: mAChR-A is required in the MB for short term aversive olfactory learning and memory but not for naïve behavior

**(A)** qRT-PCR of mAChR-A with mAChR-A RNAi driven by elav-GAL4. The housekeeping gene eEF1a2 (eukaryotic translation elongation factor 1 alpha 2, CG1873) was used for normalization. Knockdown flies have ~30% of the control levels of mAChR-A mRNA (mean  $\pm$  SEM; number of biological replicates (left to right): 6, 7, 7, 4, 4, each with 3 technical replicates; \*  $p < 0.05$ ; Kruskal-Wallis test with Dunn's multiple comparisons test). For detailed statistical analysis see Table S1.

**(B)** Each trace shows the movement of an individual fly during the training protocol, with fly position in the chamber (horizontal dimension) plotted against time (vertical dimension). Colored rectangles illustrate which odor is presented on each side of the chamber during training and testing. Flies were conditioned against MCH (blue rectangles; see Methods).

**(C)** Learning scores in flies with mAChR-A RNAi driven by OK107-GAL4. mAChR-A knockdown reduced learning scores compared to controls (mean  $\pm$  SEM, n (left to right): 69, 69, 70, 71, 71, \*  $p < 0.05$ , \*\*  $p < 0.01$ ; Kruskal-Wallis test with Dunn's multiple comparisons test).

**(D)** mAChR-A KD flies show normal olfactory avoidance to OCT and MCH compared to their genotypic controls (mean  $\pm$  SEM, n (left to right): 68, 67, 58, 63, 91, 67,  $p = 0.82$  for OCT,  $p = 0.64$  for MCH; Kruskal-Wallis test). Colored rectangles show stimulus protocol as in (B); red for odor (MCH or OCT), white for air.

**(E)** Learning scores in flies with mAChR-A RNAi 1 driven by OK107-GAL4 with GAL80ts repression. Flies raised at 23 °C and heated to 31 °C (red outlines) as adults had impaired learning compared to controls. Control flies kept at 23 °C throughout (blue outline), thus blocking mAChR-A RNAi expression, showed no learning defects (mean  $\pm$  SEM, n (left to right): 51, 41, 58, 51, \*\*  $p < 0.05$ , Kruskal-Wallis test with Dunn's multiple comparisons test). For detailed statistical analysis see Table S1.

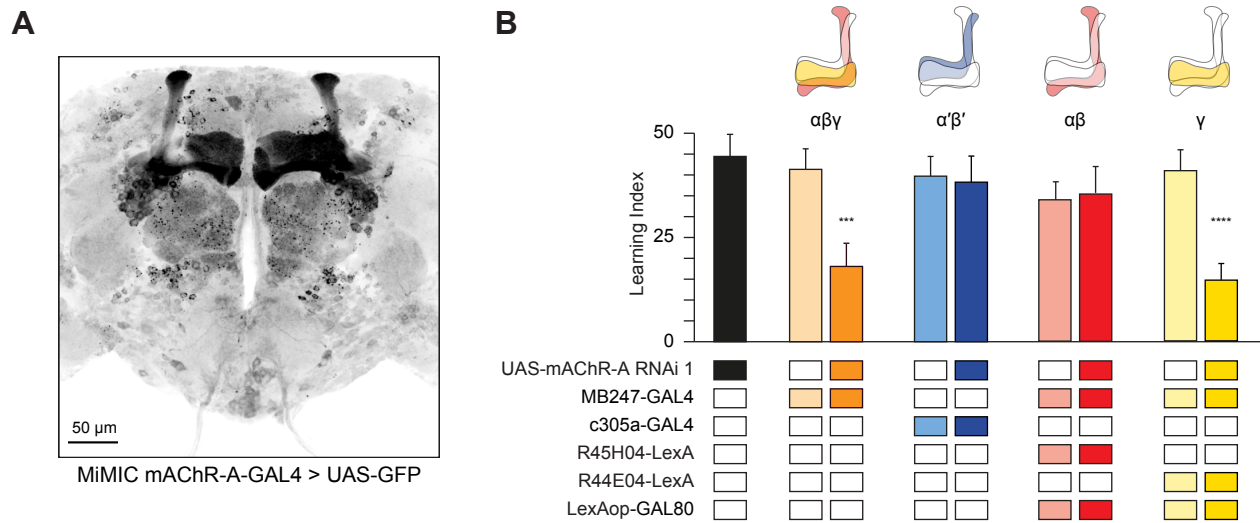

### Figure 2: mAChR-A is required for short term aversive olfactory learning and memory in $\gamma$ KCs

**(A)** Maximum intensity projection of 70 confocal sections (2  $\mu$ m) through the central brain of a fly carrying MiMIC-mAChR-A-GAL4 and 20xUAS-6xGFP transgenes. MB  $\alpha\beta$  and  $\gamma$  lobes are clearly observed. No GFP expression is observed in  $\alpha'\beta'$  lobes.

**(B)** mAChR-A RNAi 1 was targeted to different subpopulations of KCs. Learning scores were reduced compared to controls when mAChR-A RNAi 1 was expressed in  $\alpha\beta$  and  $\gamma$  KCs or  $\gamma$  KCs alone, but not when mAChR-A RNAi 1 was expressed in  $\alpha\beta$  or  $\alpha'\beta'$  KCs. (mean  $\pm$  SEM, n (left to right): 69, 51, 70, 76, 69, 60, 68, 66, 71, \*\*\*  $p < 0.001$ , Kruskal-Wallis test with Dunn's multiple comparisons test). For detailed statistical analysis see Table S1. The data for the UAS-mAChR-A RNAi 1 control are duplicated from Figure 1.



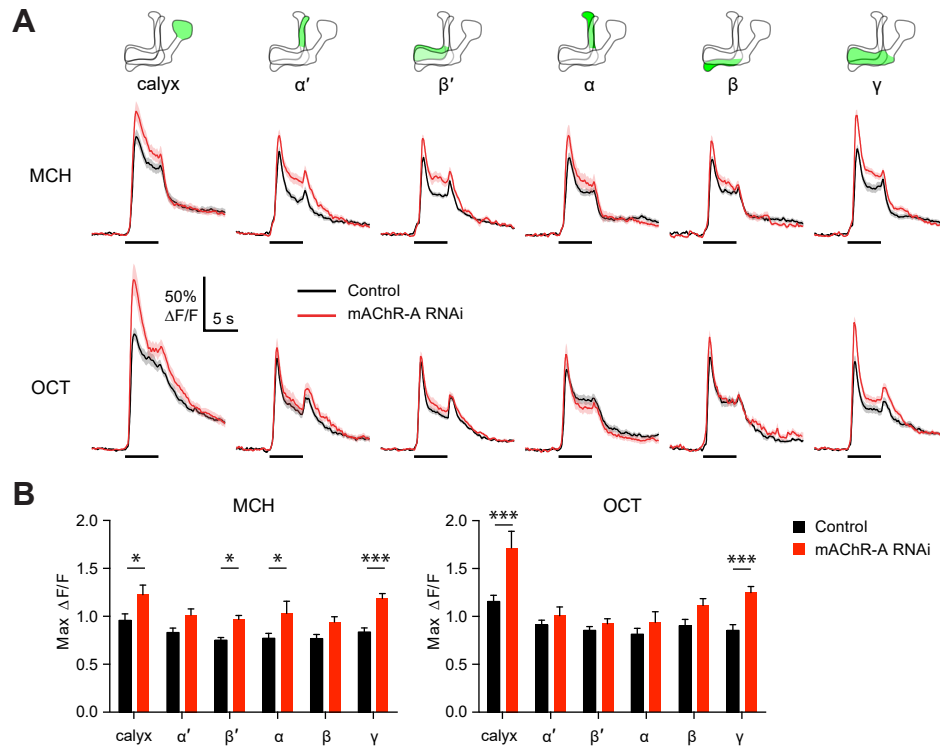

### Figure 3: mAChR-A knockdown increases odor responses in $\gamma$ KCs.

Odor responses to MCH and OCT were measured in control (OK107-GAL4>GCaMP6f, Dcr-2) and knockdown (OK107-GAL4>GCaMP6f, Dcr-2, mAChR-A-RNAi 2) flies.

**(A)**  $\Delta F/F$  of GCaMP6f signal in different areas of the MB in control (black) and knockdown (red) flies, during presentation of odor pulses (horizontal lines). Data are mean (solid line)  $\pm$  SEM (shaded area). Diagrams illustrate which region of the MB was analyzed.

**(B)** Peak response of the traces presented in A (mean  $\pm$  SEM.)  $n$  given as number of hemispheres (number of flies) for control and knockdown flies, respectively: calyx, 23 (13), 17 (10);  $\alpha$  and  $\alpha'$ , 24 (13), 20 (10);  $\beta$ ,  $\beta'$  and  $\gamma$ , 27 (14), 22 (11). \*  $p < 0.05$ , \*\*\*  $p < 0.001$ , 2-way ANOVA with Holm-Sidak multiple comparisons test). For detailed statistical analysis see Table S1.

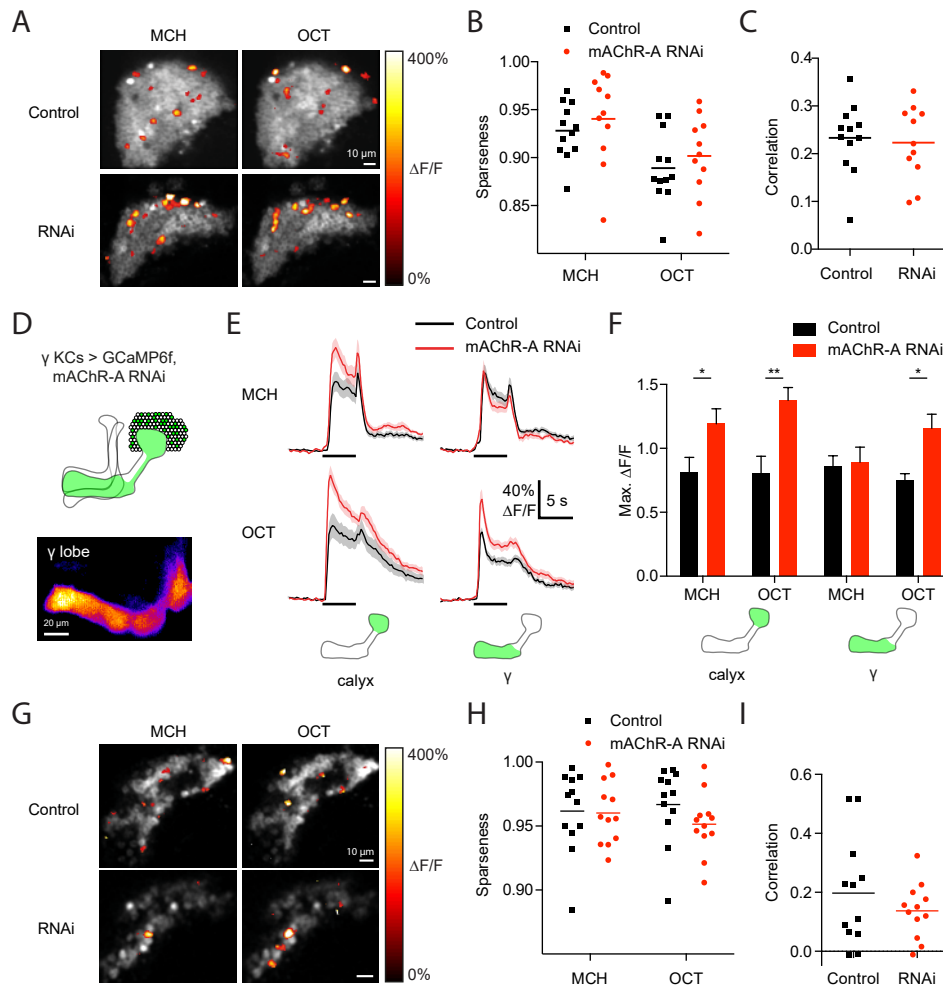

**Figure 4: mAChR-A knockdown does not affect KC odor identity coding.**

**(A)** Example activity maps (single optical sections from a z-stack) of KC odor responses to MCH and OCT in control (OK107-GAL4>GCaMP6f, Dcr-2) and mAChR-A knockdown (OK107-GAL4>GCaMP6f, Dcr-2, mAChR-A-RNAi 2) flies where all KCs are imaged. False-coloring indicates  $\Delta F/F$  of the odor response, overlaid on grayscale baseline GCaMP6f signal. Scale bar, 10  $\mu\text{m}$ . For detailed statistical analysis see Table S1.

**(B)** Sparseness of pan-KC population responses is not affected by mAChR-A knockdown ( $p = 0.38$ , 2-way repeated-measures ANOVA).

**(C)** Correlation between pan-KC population responses to MCH and OCT is not affected by mAChR-A knockdown ( $p = 0.75$ , t-test).

**(D)** Upper: diagram of  $\gamma$  KCs (green). Lower: False-coloured average-intensity Z-projection of the horizontal lobe in a control fly imaged from a dorsal view in panel E (mb247-GAL4>GCaMP6f, R44E04-LexA>GAL80), averaged over 10 s before the odor stimulus. R44E04-LexA>GAL80 almost completely suppresses  $\beta$  lobe expression. Scale bar, 20  $\mu\text{m}$ .

**(E)** Knocking down mAChR-A only in  $\gamma$  KCs increases  $\gamma$  KC odor responses. Shown here are odor responses in the calyx and  $\gamma$  lobe of control (mb247-GAL4>GCaMP6f, R44E04-LexA>GAL80) and knockdown (mb247-GAL4>GCaMP6f, mAChR-A-RNAi 1, R44E04-LexA>GAL80) flies.

**(F)** Peak response of the traces presented in D (mean  $\pm$  SEM.)  $n$  given as number of hemispheres (number of flies): 11 (6) for control, 12 (6) for knockdown. \*  $p < 0.05$ , \*\*  $p < 0.01$ , 2-way repeated-measures ANOVA with Holm-Sidak multiple comparisons test.

**(G)** Example activity maps (single optical sections from a z-stack) of  $\gamma$  KC odor responses to MCH and OCT in control (mb247-GAL4>GCaMP6f, R44E04-LexA>GAL80) and knockdown (mb247-GAL4>GCaMP6f, mAChR-A-RNAi 1, R44E04-LexA>GAL80) flies. Note the gaps in baseline GCaMP6f signal due to lack of  $\alpha\beta$  and  $\alpha'\beta'$  KCs labeled. Scale bar, 10  $\mu\text{m}$

**(H)** Sparseness of  $\gamma$  KC population responses is not affected by mAChR-A knockdown ( $p = 0.76$ , 2-way repeated-measures ANOVA).

**(I)** Correlation between  $\gamma$  KC population responses to MCH and OCT is not affected by mAChR-A knockdown ( $p = 0.32$ , t-test).

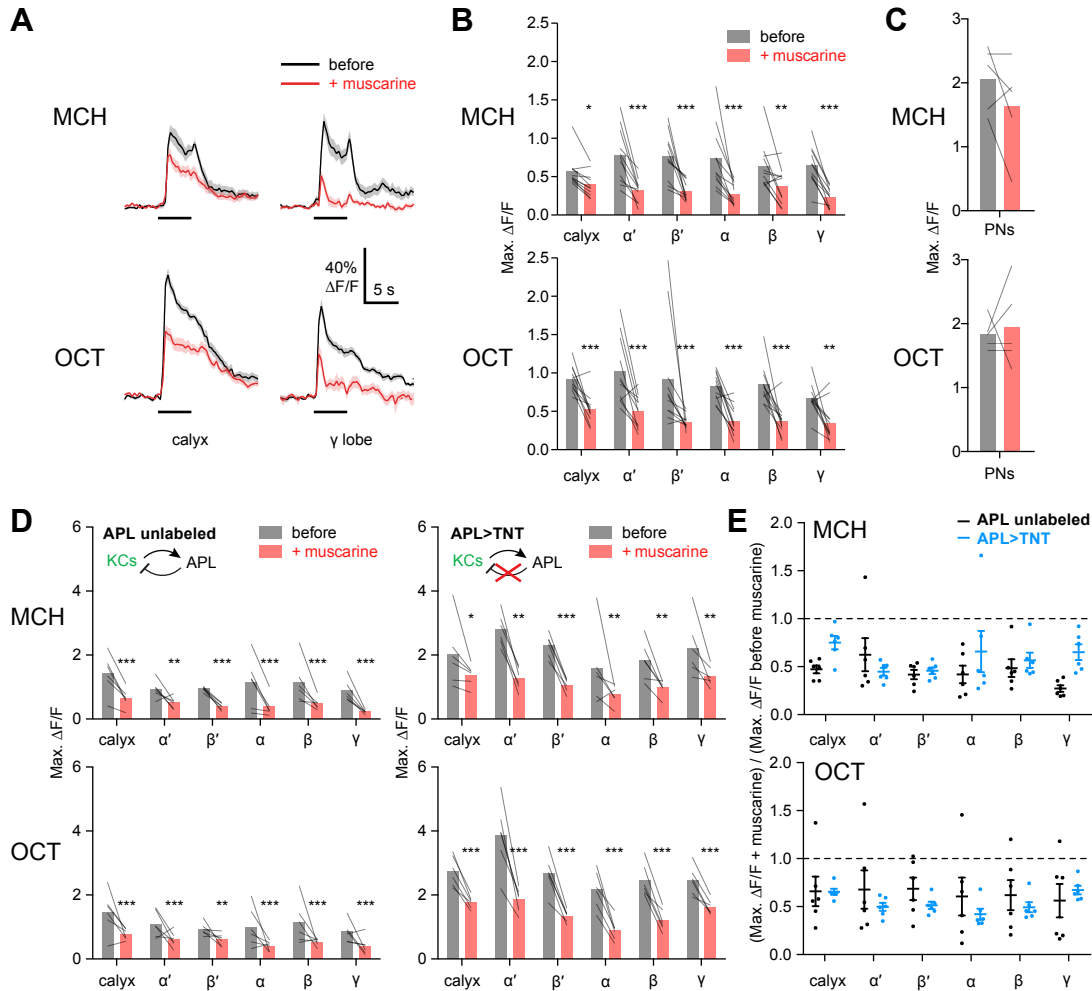

### Figure 5: KC odor responses are decreased by muscarine.

**(A)** Odor responses in the calyx and  $\gamma$  lobe of OK107-GAL4>GCaMP6f flies, before (black) and after (red) adding 10  $\mu$ M muscarine in the bath. Data are mean (solid line)  $\pm$  SEM (shaded area); horizontal lines indicate the odor pulse. Traces for all lobes are shown in Figure S4. For detailed statistical analysis see Table S1.

**(B)** Peak  $\Delta F/F$  during the odor pulse before and after muscarine.  $n = 11$  hemispheres from 6 flies. \*  $p < 0.05$ , \*\*  $p < 0.01$ , \*\*\*  $p < 0.001$  by 2-way repeated measures ANOVA with Holm-Sidak multiple comparisons test.

**(C)** Odor responses in PN axons in the calyx are not affected by 10  $\mu$ M muscarine, in GH146-GAL4>GCaMP6f flies ( $p > 0.49$ , 2-way repeated measures ANOVA,  $n = 5$  flies).

**(D)** Peak  $\Delta F/F$  during the odor pulse before and after muscarine in control hemispheres where APL was unlabeled (left,  $n = 6$  hemispheres from 6 flies) and hemispheres where APL expressed tetanus toxin (right,  $n = 6$  hemispheres from 5 flies). \*  $p < 0.05$ , \*\*  $p < 0.01$ , \*\*\*  $p < 0.001$  by 2-way repeated measures ANOVA with Holm-Sidak multiple comparisons test.

**(E)** (Response (peak  $\Delta F/F$  during the odor pulse) after muscarine) / (response before muscarine), using data from (D). No significant differences were observed ( $p > 0.05$ , 2-way repeated measures ANOVA with Holm-Sidak multiple comparisons test).

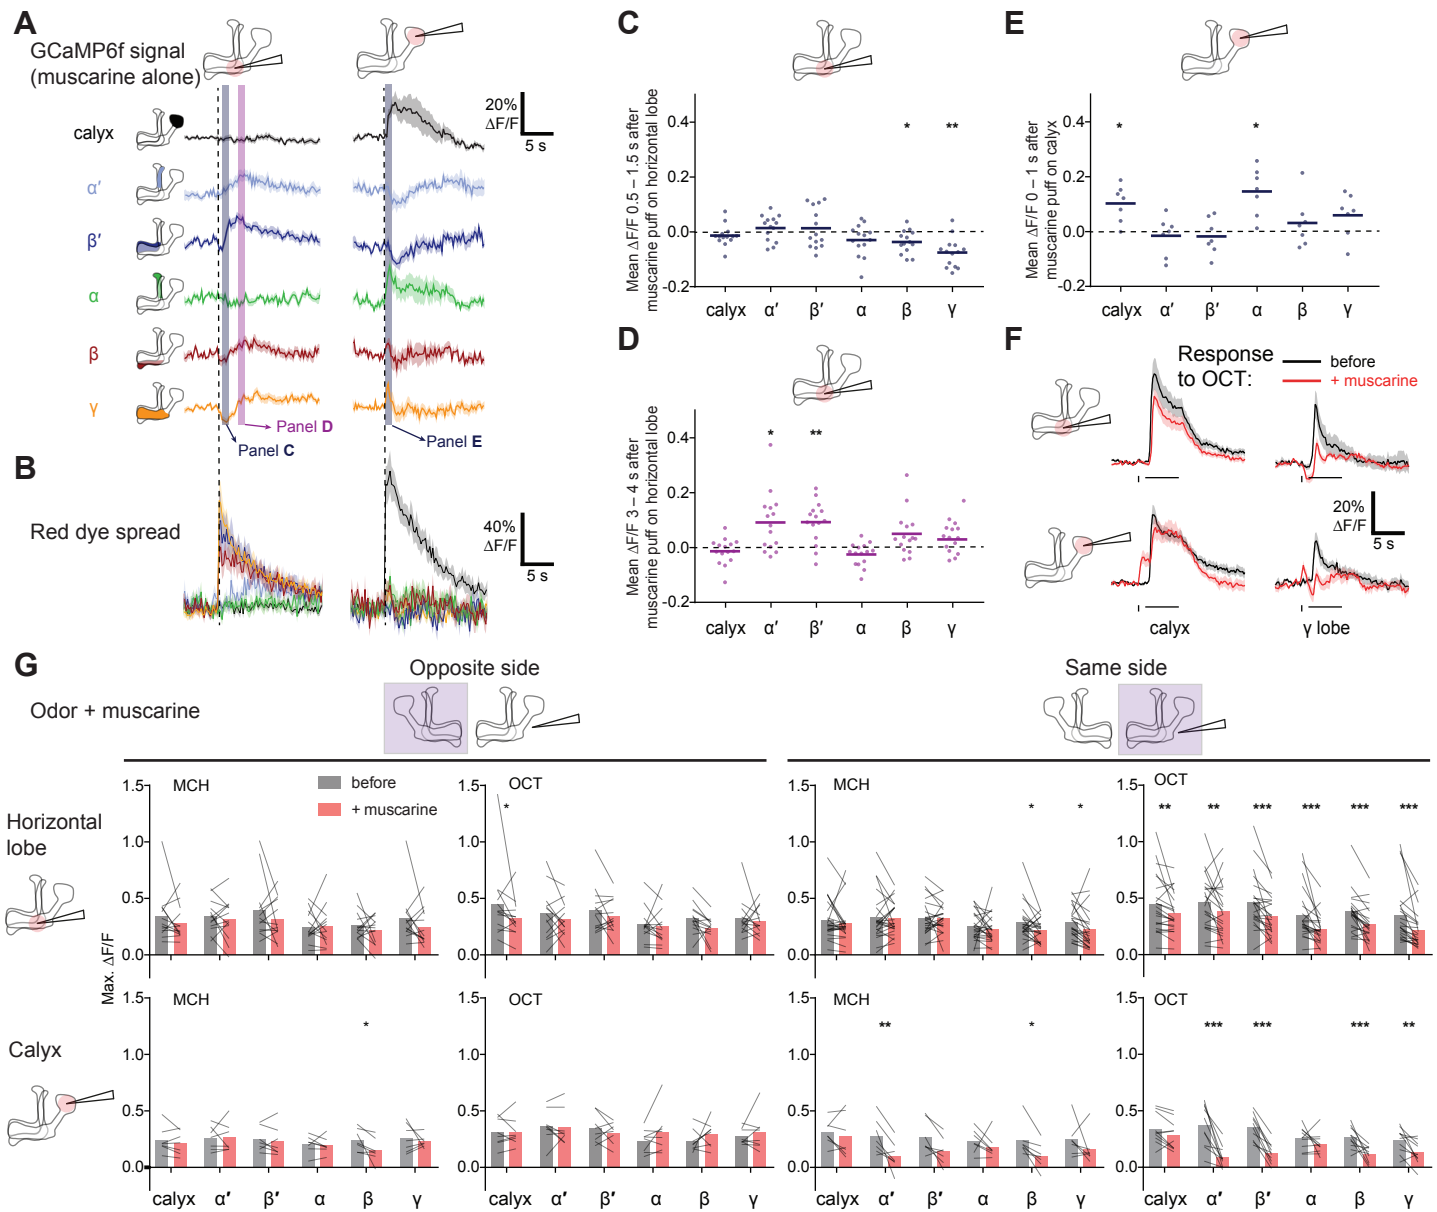

**Figure 6: Local muscarine application to the calyx and horizontal lobe differentially affects KC subtypes**

(A) Left: Schematic of MB, showing color scheme for the different regions where responses are quantified. Right: Average  $\Delta F/F$  GCaMP6f signal in different areas of the MB of OK107>GCaMP6f flies in response to a 10 ms pulse of 20 mM muscarine on the horizontal lobe (left column) and the calyx (right column). Data are mean (solid line)  $\pm$  SEM (shaded area). Dashed vertical line shows the timing of muscarine application. Gray and purple shaded bars indicate time windows used to quantify responses in panel C-E. n given as number of hemispheres (number of flies): 15 (8) for pulsing on the horizontal lobe, 7 (5) for calyx.

(B)  $\Delta F/F$  traces of red dye indicator, showing which MB regions the muscarine spread to. The traces follow the same color scheme and visuals as shown in panel A.

(C-E) Scatter plot showing average  $\Delta F/F$  of GCaMP6f signal of the different MB regions at time 0.5-1.5 s (C) and 3-4 s (D) following 10 ms pulse of 20 mM muscarine on the horizontal lobe or the calyx (E, time 0-1 s), quantified from traces shown in (A). Colors match the shaded time windows in A. n: 15 (8) for pulsing on the horizontal lobe, 7 (5) for calyx. \*  $p < 0.05$ , \*\*  $p < 0.01$ , one-sample t-test or Wilcoxon signed-rank test (different from 0), Bonferroni correction for multiple comparisons.

(F) Average  $\Delta F/F$  GCaMP6f signal of the calyx and  $\gamma$  lobe during odor pulses of OCT (horizontal bar), before (black) and after (red) muscarine application on the horizontal lobe (top), or the calyx (bottom), 1 s before the odor pulse (vertical bar). Data are mean (solid line)  $\pm$  SEM (shaded area). n: 12 (8) for pulsing on the horizontal lobe, 7 (5) for calyx. See Figure S5 for all traces.

(G) Line-bar plots showing paired peak  $\Delta F/F$  GCaMP6f responses of the different MB regions during 5 s odor pulses of MCH or OCT, before (gray) and after (pink) muscarine application to the calyx or the horizontal lobe, in the hemisphere where the muscarine was applied (same side, right) or the opposite (opposite side, left). Muscarine was applied 1 s before the odor pulse. Bars show mean value. n: Horizontal lobe same side MCH 23 (15), OCT 22 (15), opposite side MCH 13 (7), OCT 13 (7). Calyx same side MCH 8 (6), OCT 10 (8), opposite side MCH 7 (5), OCT 7 (5). \*  $p < 0.05$ , \*\*  $p < 0.01$ , \*\*\*  $p < 0.001$  by 2-way repeated measures ANOVA with Holm-Sidak multiple comparisons test. n differs between OCT horizontal lobe, same side vs. panel F because a scripting error meant that for 10 of the recordings, the odor pulse paired with muscarine presentation lasted 4 s, not 5 s. These data are included in G, because the peak  $\Delta F/F$  always occurred within the first 4 s of the odor pulse and thus was unaffected by the scripting error, but they are excluded from F because the stimuli do not match.

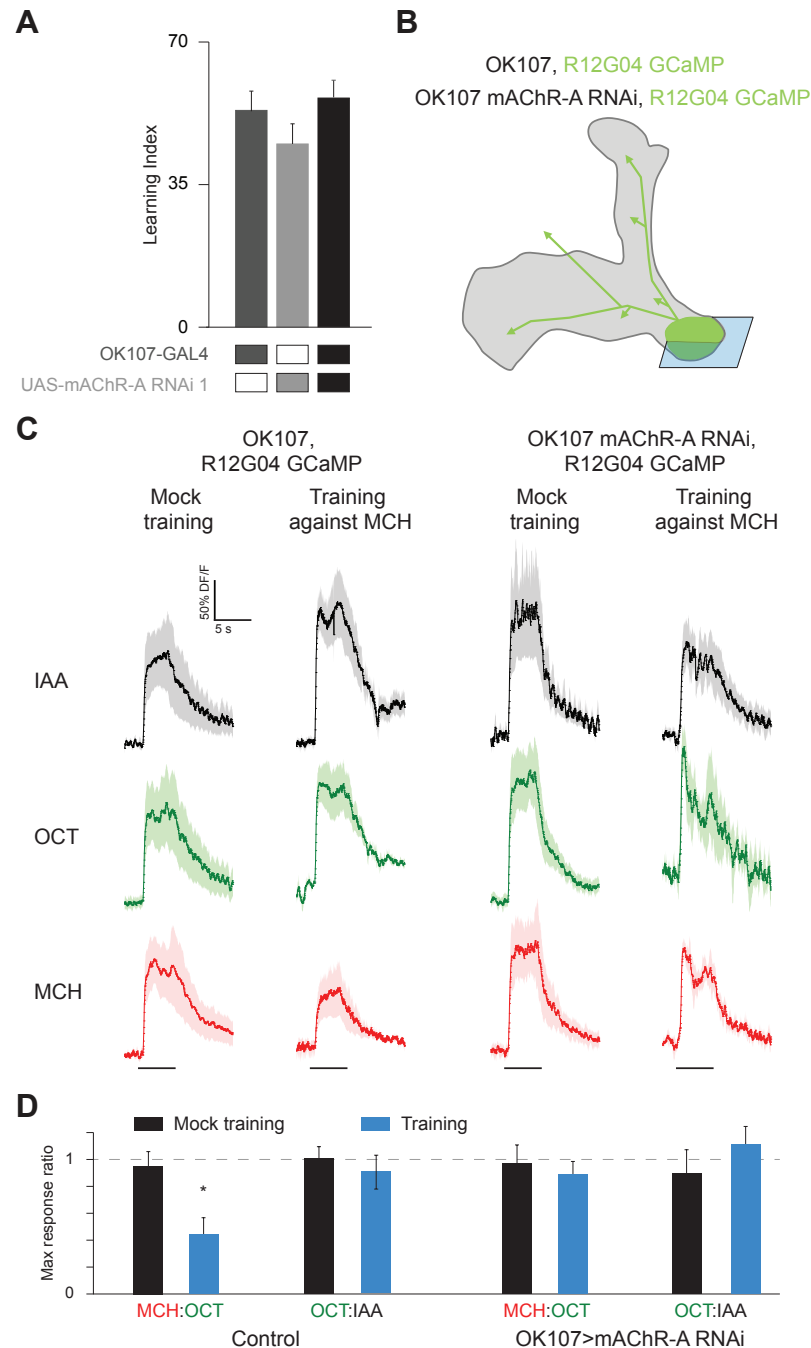

**Figure 7: mAChR-A KD prevents aversive conditioning from decreasing the response to the trained odor in MB-MVP2**

**(A)** When flies were conditioned against MCH using 90 V electric shock (see Methods), driving mAChR-A RNAi in KCs using OK107-GAL4 did not affect learning compared to controls (mean  $\pm$  SEM, n (left to right): 52, 49, 51,  $p > 0.13$ , Kruskal-Wallis test). For detailed statistical analysis see Table S1.

**(B)** Diagram of genotype: mAChR-A RNAi 1 was expressed in KCs with OK107 (gray), while GCaMP6f was expressed in MB-MVP2 with R12G04-LexA (green). The imaging plane is shown in blue.

**(C)** Odor responses in MB-MVP2 to isoamyl acetate (IAA, not presented during training), OCT (not shocked during training) and MCH (shocked during training), in control (OK107-GAL4, R12G04-LexA>GCaMP6f, mb247-dsRed) and knockdown (OK107-GAL4>mAChR-A-RNAi 1, R12G04-LexA>GCaMP6f, mb247-dsRed) flies, with mock training (no shock) or training against MCH. Traces show mean (solid line)  $\pm$  SEM (shaded area).

**(D)** MCH:OCT or OCT:IAA ratios of peak  $\Delta F/F$  values from (C).  $n = 5$ . \*  $p < 0.05$ , Mann-Whitney test. Power analysis shows that  $n = 5$  would suffice to detect an effect as strong as the difference between training and mock training in the MCH:OCT ratio, with power 0.9.

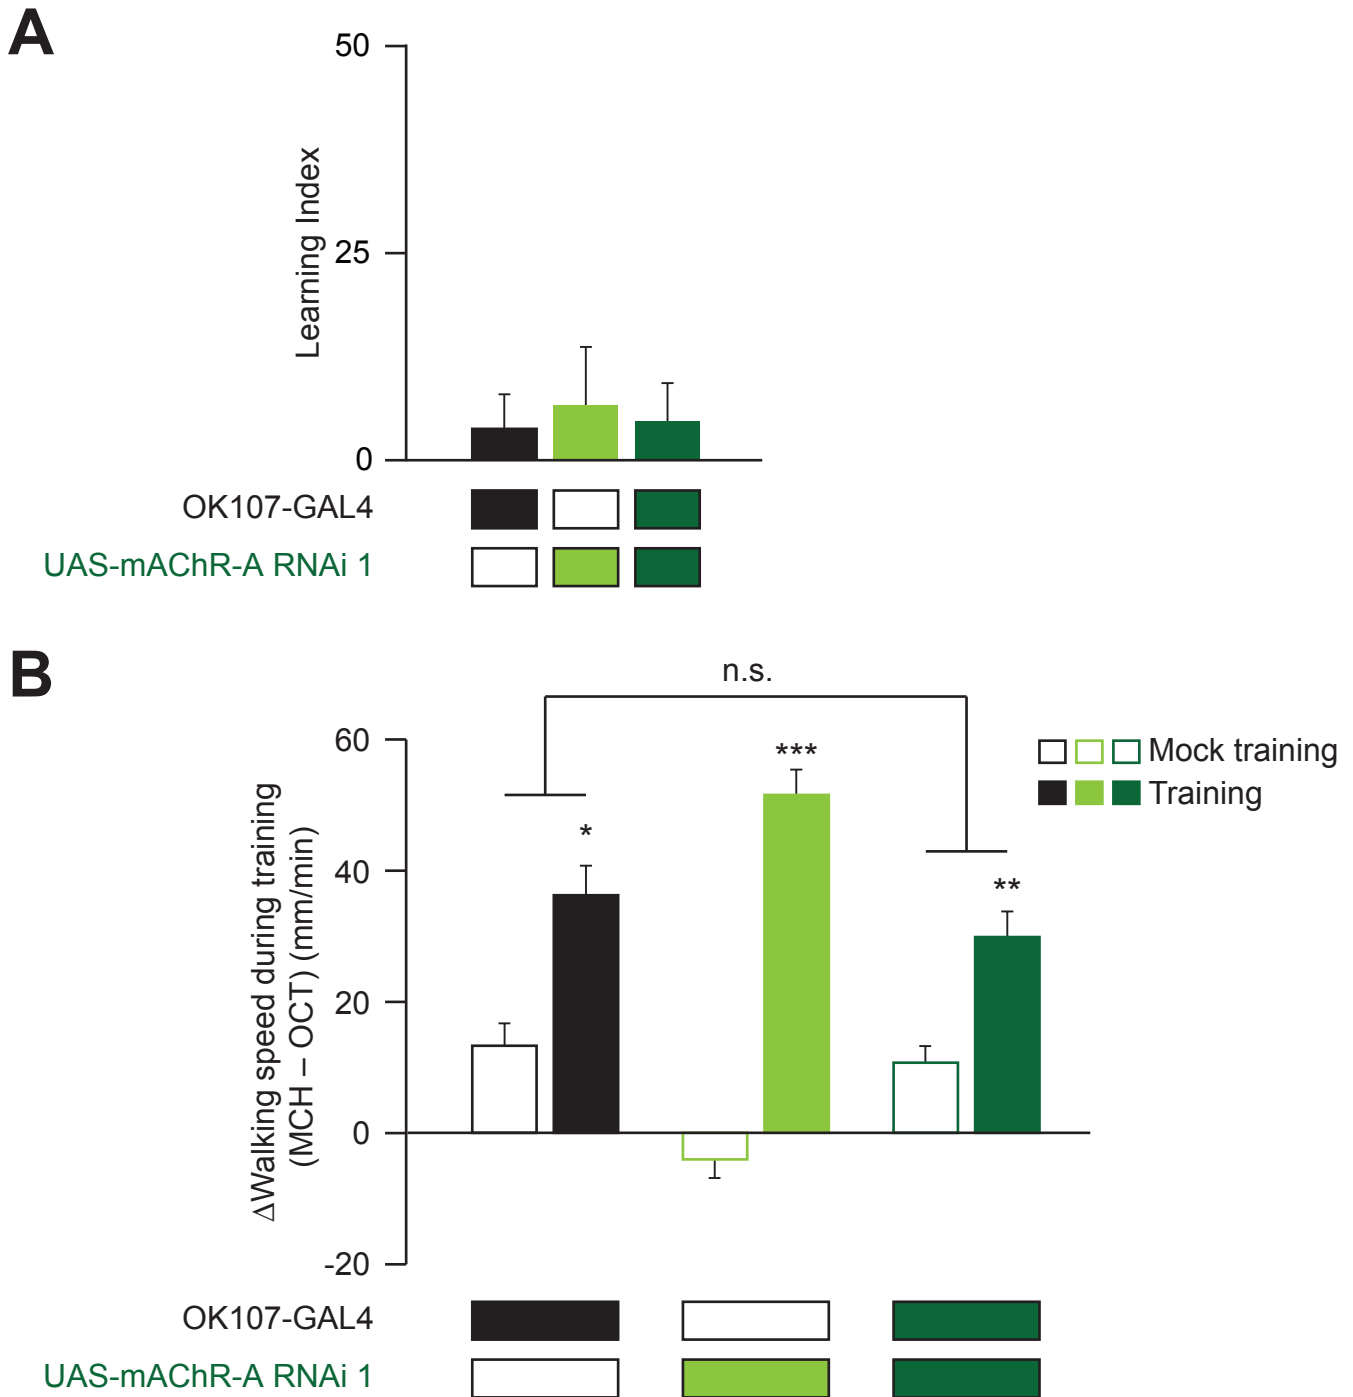

**Figure S1: Mock trained flies do not change odor preference over the course of the training protocol**

**(A)** Flies were subjected to the same protocol as in Figure 1 but without electric shock.

As expected the flies do not change their odor preference and have a learning index which is not statistically different from 0 (n (left to right): 79, 73, 71;  $p > 0.3$ , one-sample t-test).

For detailed statistical analysis see Table S1.

**(B)** Sensitivity to shock (extent to which flies walk faster while being shocked) is not affected by knocking down mAChR-A in KCs. Shown here is walking speed during training (time = 5-6 and 7-8 min in Figure 1B), taking the difference between speed during MCH (CS+) and speed during OCT (CS-).

In mock training, the difference is close to zero, but during training, when MCH is paired with shock, flies walk much faster in MCH (\*  $p < 0.05$ , \*\*  $p < 0.01$ , \*\*\*  $p < 0.001$ , Mann-Whitney test with Bonferroni correction, comparing training vs. mock training). The effect of shock is not significantly different between OK107 alone and OK107>mAChR-A-RNAi flies (n.s.:  $p = 0.44$  for interaction between genotype and training vs. mock training, 2-way ANOVA). n (left to right): 79, 99, 79, 79, 139, 159.

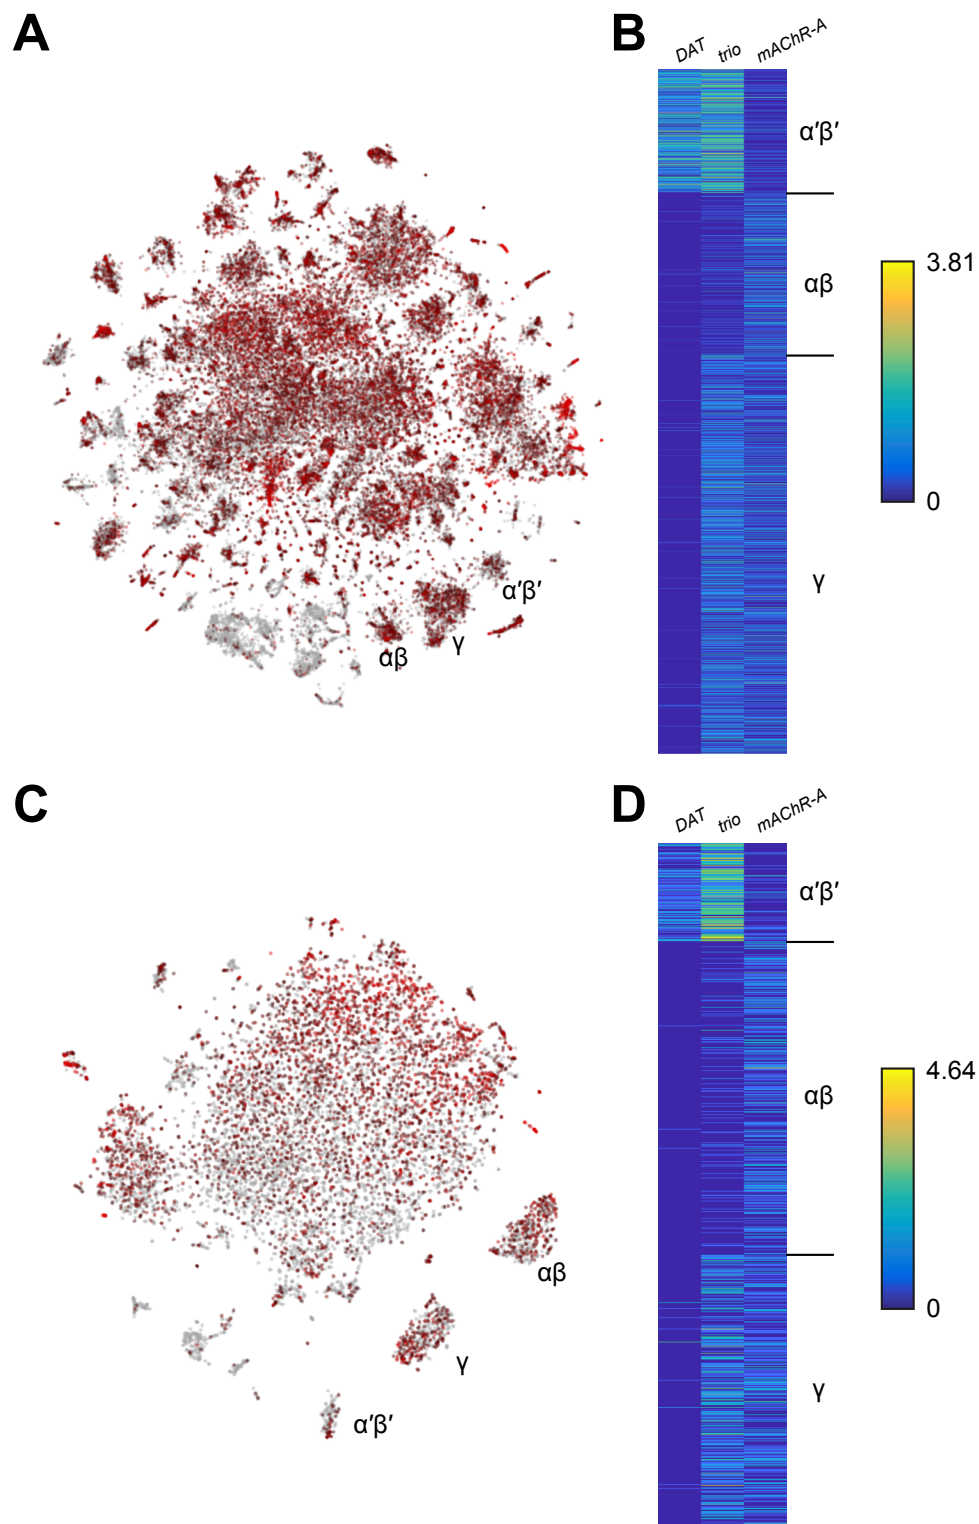

**Figure S2. Expression of mAChR-A from single-cell transcriptome profiling.**

A. Data from Davie et al., 2018. 56,902 *Drosophila* brain cells arranged according to their single-cell transcriptome profiles, along the top 2 principal components using t-SNE. Red coloring indicates expression of mAChR-A. KC subtype clusters are labeled as identified in David et al., 2018.

B. Expression of DAT (marker for  $\alpha'\beta'$  KCs), trio (marker for  $\alpha'\beta'$  and  $\gamma$  KCs), and mAChR-A for cells identified as  $\alpha'\beta'$ ,  $\alpha\beta$  and  $\gamma$  KCs in Davie et al., 2018. mAChR-A expression is higher in  $\alpha\beta$  and  $\gamma$  KCs compared to  $\alpha'\beta'$  KCs.

C-D. As in A-B but with data from Croset et al., 2018 (10,286 *Drosophila* brain cells).

Images screenshotted and raw data downloaded from SCoPe (<http://scope.aertslab.org>) on 24 June 2018.

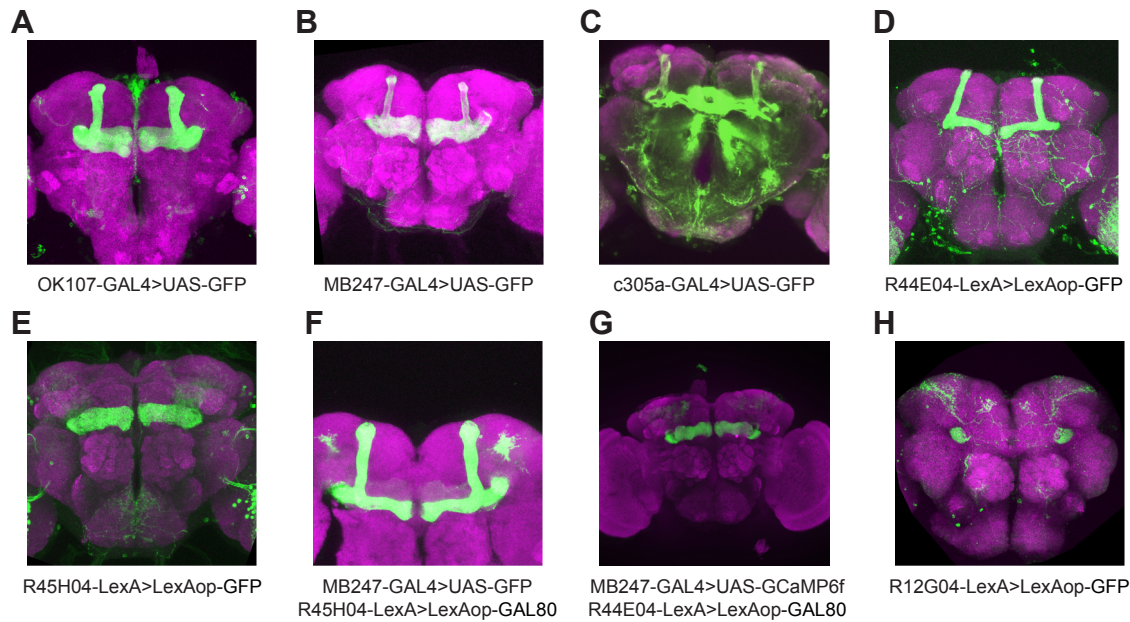

**Figure S3: Expression patterns of GAL4 and LexA driver lines used in this study.**

GFP expression was driven by the named GAL4 or LexA driver lines and the general neuropil was stained with an antibody to NC82 (magenta). Images are maximum-intensity Z-projections of confocal stacks. Panels A-D, G show only the planes of the mushroom body lobes and peduncle to more clearly show which lobes are labeled.

**(A)** OK107-GAL4 labels all KCs.

**(B)** MB247-GAL4 labels  $\alpha\beta$  and  $\gamma$  KCs.

**(C)** c305a-GAL4 labels  $\alpha'\beta'$  KCs.

**(D)** R44E04-LexA labels  $\alpha\beta$  KCs.

**(E)** R45H04-LexA strongly labels  $\gamma$  KCs.

**(F)** Silencing MB247-GAL4 expression in  $\gamma$  KCs by using R45H04-LexA to drive lexAop-GAL80 in  $\gamma$  KCs results in fairly specific expression in  $\alpha\beta$  KCs.

**(G)** Silencing MB247-GAL4 expression in  $\alpha\beta$  KCs by using R44E04 to drive lexAop-GAL80 in  $\alpha\beta$  KCs results in fairly specific expression in  $\gamma$  KCs.



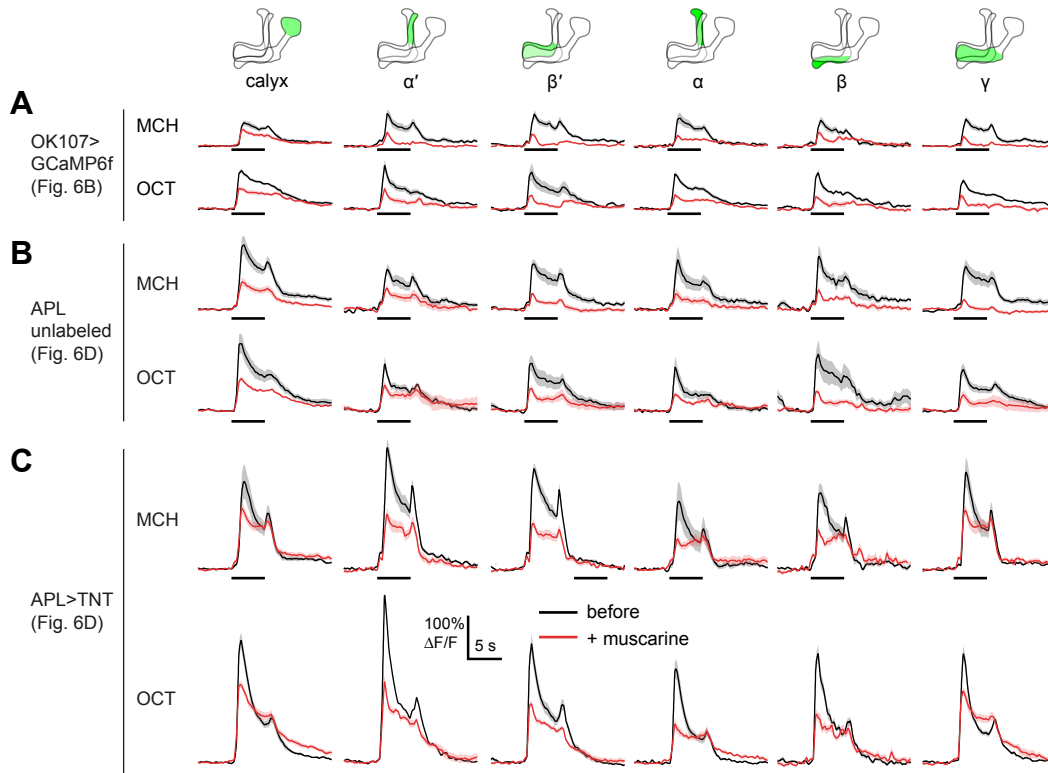

**Figure S4: Odor responses of all lobes are reduced by bath muscarine.** Extended data for **Figure 5**. Odor responses in OK107-GAL4>GCaMP6f flies (**A**), control APL unlabeled hemispheres (**B**), and APL>TNT hemispheres (**C**), before (black) and after (red) adding 10  $\mu$ M muscarine in the bath. Data are mean (solid line)  $\pm$  SEM (shaded area); diagrams illustrate which region of the MB was analyzed; horizontal lines indicate the odor pulse. These are the traces for the summary data shown in **Figure 5B,D**.

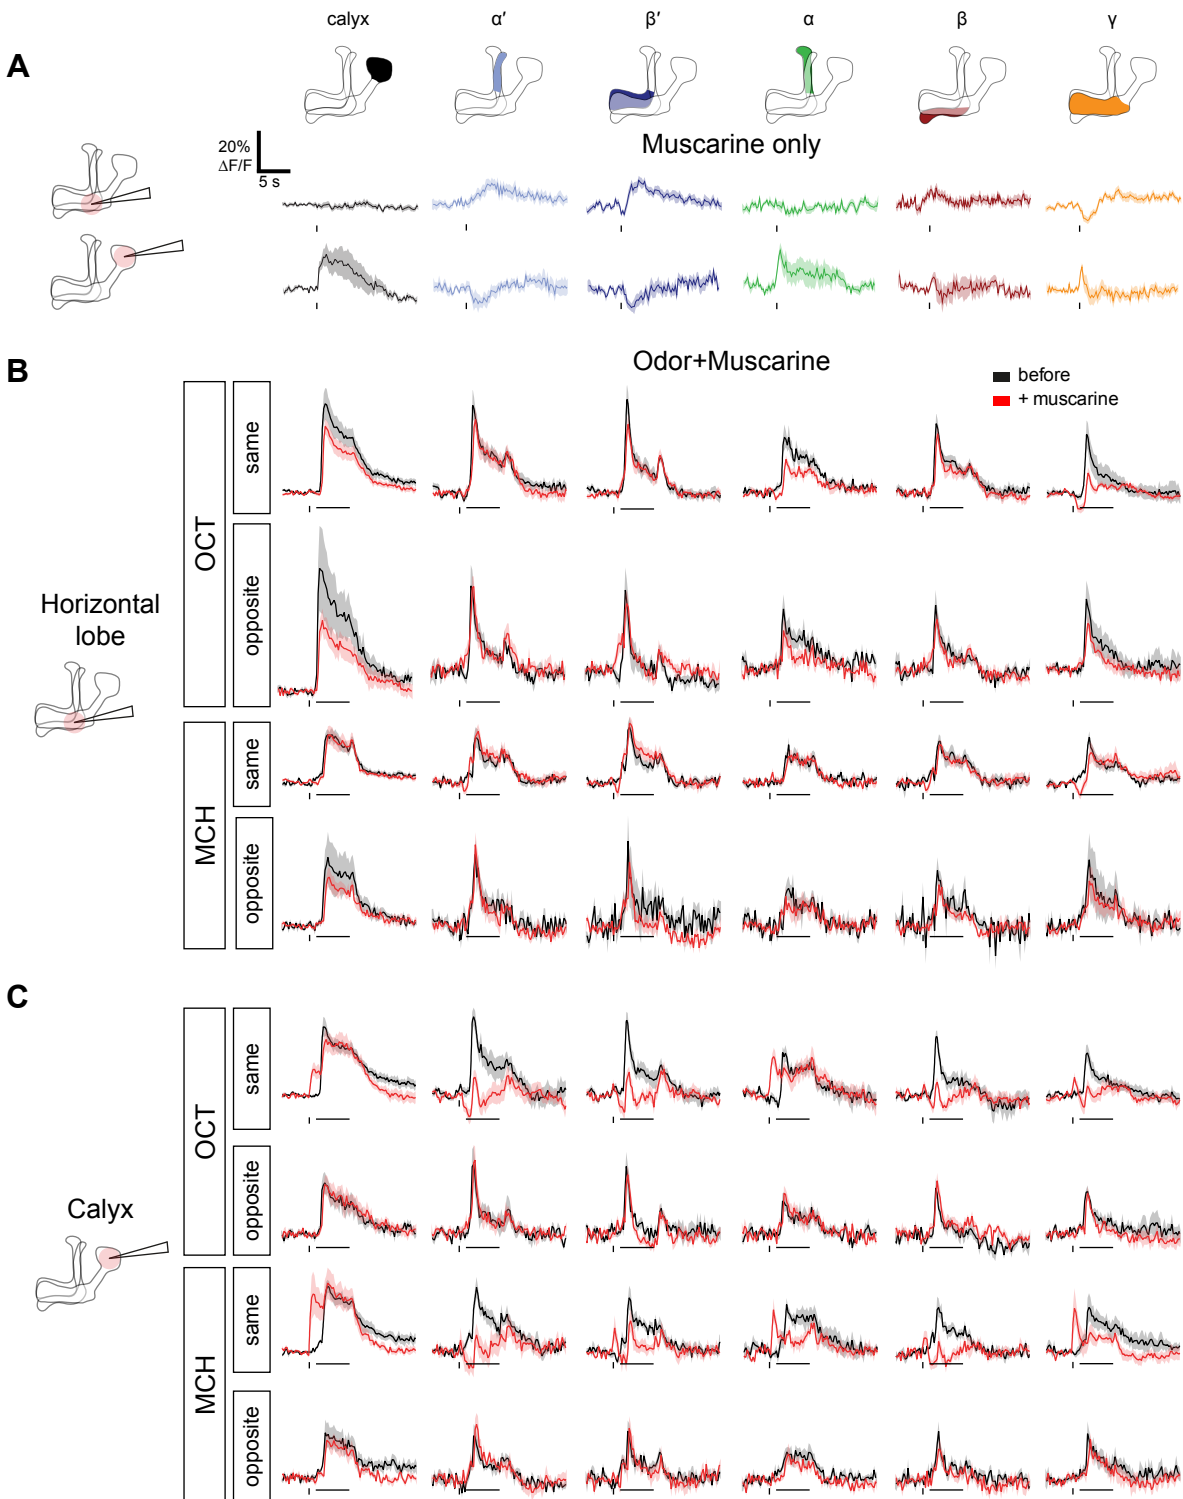

**Figure S5: Muscarine differentially affects the MB regions when it is locally applied to the calyx or horizontal lobe.** Average  $\Delta F/F$  GCaMP6f traces of the different MB regions of OK107>GCaMP6f flies that only received the muscarine pulse (**A**) or received an odor pulse (MCH or OCT) before (black) or after (red) 10 ms pulse of 20 mM muscarine (**B,C**). Panel A is duplicated from Figure 6A; panels B,C are the traces corresponding to the Figure 6G. Muscarine was applied either in the horizontal lobe or calyx, 1 s before the odor pulse where applicable. Traces are from the same side or the opposite side that muscarine was applied. Data are mean (solid line)  $\pm$  SEM (shaded area). Horizontal bars indicate odor pulse timing and duration. Vertical bars indicate timing of muscarine pulse. n, by number of hemispheres (number of flies): Horizontal lobe same side MCH 13 (8), OCT 12 (8), opposite side MCH 6 (3), OCT 6 (3), muscarine alone 15 (8). Calyx same side MCH 6 (4), OCT 7 (5), opposite side MCH 5 (3), OCT 5 (3), muscarine alone 7 (5). n for odor + muscarine traces differs between this figure vs. Figure 6G because a scripting error meant that for 10 of the recordings, the odor pulse paired with muscarine presentation lasted 4 s, not 5 s. These data are included in Figure 6G, because the peak  $\Delta F/F$  always occurred within the first 4 s of the odor pulse and thus was unaffected by the scripting error, but they are excluded from traces shown in this figure because the stimuli do not match.

**Table S1: Statistical analysis**

| Figure    | Data                           | Statistical method                                 | Comparison                                                                                            | P-value/<br>adjusted P-<br>value | Significance |
|-----------|--------------------------------|----------------------------------------------------|-------------------------------------------------------------------------------------------------------|----------------------------------|--------------|
| Figure 1A | Real time PCR of RNAi 1 (TRiP) | One way non parametric ANOVA - Kruskal-Wallis test | ANOVA<br>1. ELAV-GAL4<br>2. UAS-mACR-A-RNAi-1<br>3. ELAV-GAL4>UAS-mACR-A-RNAi-1                       | < 0.0001                         | ****         |
|           |                                | Dunn's multiple comparisons test                   | 1. ELAV-GAL4<br>2. UAS-mACR-A-RNAi-1                                                                  | 0.4586                           | n.s.         |
|           |                                |                                                    | 1. ELAV-GAL4<br>2. ELAV-GAL4>UAS-mACR-A-RNAi-1                                                        | 0.0004                           | ***          |
|           |                                |                                                    | 1. UAS-mACR-A-RNAi-1<br>2. ELAV-GAL4>UAS-mACR-A-RNAi-1                                                | 0.0354                           | *            |
|           | Real time PCR of RNAi 2 (VDRC) | One way non parametric ANOVA - Kruskal-Wallis test | ANOVA<br>1. ELAV-GAL4<br>2. UAS-mACR-A-RNAi-2, UAS-DCR<br>3. ELAV-GAL4>UAS-mACR-A-RNAi-2, UAS-DCR     | 0.0035                           | **           |
|           |                                | Dunn's multiple comparisons test                   | 1. ELAV-GAL4<br>2. UAS-mACR-A-RNAi-2, UAS-DCR                                                         | >0.9999                          | n.s.         |
|           |                                |                                                    | 1. ELAV-GAL4<br>2. ELAV-GAL4>UAS-mACR-A-RNAi-2, UAS-DCR                                               | 0.0209                           | *            |
|           |                                |                                                    | 1. UAS-mACR-A-RNAi-2, UAS-DCR<br>2. ELAV-GAL4>UAS-mACR-A-RNAi-2, UAS-DCR                              | 0.0413                           | *            |
| Figure 1C | Learning index                 | One way non parametric ANOVA - Kruskal-Wallis test | ANOVA<br>1. OK107-GAL4<br>2. UAS-mAChR-A-RNAi 2, UAS-DCR<br>3. OK107-GAL4>UAS-mAChR-A-RNAi 2, UAS-DCR | < 0.0001                         | ****         |
|           |                                | Dunn's multiple comparisons test                   | 1. OK107-GAL4<br>2. UAS-mAChR-A-RNAi 2, UAS-DCR                                                       | 0.5689                           | n.s.         |

|           |                     |                                                       |                                                                                     |          |      |
|-----------|---------------------|-------------------------------------------------------|-------------------------------------------------------------------------------------|----------|------|
|           |                     |                                                       | 1. OK107-GAL4<br>2. OK107-GAL4>UAS-mAChR-A-RNAi 2, UAS-DCR                          | 0.0085   | **   |
|           |                     |                                                       | 1. UAS-mAChR-A-RNAi 2, UAS-DCR<br>2. OK107-GAL4>UAS-mAChR-A-RNAi 2, UAS-DCR         | < 0.0001 | **** |
| Figure 1C | Learning index      | One way non parametric ANOVA -<br>Kruskal-Wallis test | ANOVA<br>1. OK107-GAL4<br>2. UAS-mAChR-A-RNAi 1<br>3. OK107-GAL4>UAS-mAChR-A-RNAi 1 | 0.0082   | **   |
|           |                     | Dunn's multiple comparisons test                      | 1. OK107-GAL4<br>2. UAS-mAChR-A-RNAi 1                                              | >0.9999  | n.s. |
|           |                     |                                                       | 1. OK107-GAL4<br>2. OK107-GAL4>UAS-mAChR-A-RNAi 1                                   | 0.0458   | *    |
|           |                     |                                                       | 1. UAS-mAChR-A-RNAi 1<br>2. OK107-GAL4>UAS-mAChR-A-RNAi 1                           | 0.0150   | *    |
| Figure 1D | Naïve avoidance OCT | One way non parametric ANOVA -<br>Kruskal-Wallis test | ANOVA<br>1. OK107-GAL4<br>2. UAS-mAChR-A-RNAi 1<br>3. OK107-GAL4>UAS-mAChR-A-RNAi 1 | 0.8260   | n.s. |
|           |                     | Dunn's multiple comparisons test                      | 1. OK107-GAL4<br>2. UAS-mAChR-A-RNAi 1                                              | >0.9999  | n.s. |
|           |                     |                                                       | 1. OK107-GAL4<br>2. OK107-GAL4>UAS-mAChR-A-RNAi 1                                   | >0.9999  | n.s. |
|           |                     |                                                       | 1. UAS-mAChR-A-RNAi 1<br>2. OK107-GAL4>UAS-mAChR-A-RNAi 1                           | >0.9999  | n.s. |
| Figure 1D | Naïve avoidance MCH | One way non parametric ANOVA -<br>Kruskal-Wallis test | ANOVA<br>1. OK107-GAL4<br>2. UAS-mAChR-A-RNAi 1<br>3. OK107-GAL4>UAS-mAChR-A-RNAi 1 | 0.6403   | n.s. |
|           |                     | Dunn's multiple comparisons test                      | 1. OK107-GAL4<br>2. UAS-mAChR-A-RNAi 1                                              | >0.9999  | n.s. |
|           |                     |                                                       | 1. OK107-GAL4                                                                       | >0.9999  | n.s. |

|           |                       |                                                    |                                                                                                                                                                             |          |      |
|-----------|-----------------------|----------------------------------------------------|-----------------------------------------------------------------------------------------------------------------------------------------------------------------------------|----------|------|
|           |                       |                                                    | 2. OK107-GAL4>UAS-mAChR-A-RNAi 1                                                                                                                                            |          |      |
|           |                       |                                                    | 1. UAS-mAChR-A-RNAi 1<br>2. OK107-GAL4>UAS-mAChR-A-RNAi 1                                                                                                                   | >0.9999  | n.s. |
| Figure 1E | Learning with Gal80ts | One way non parametric ANOVA - Kruskal-Wallis test | ANOVA<br>1. tubP-GAL80ts, OK107-GAL4<br>2. UAS-mAChR-A-RNAi 1<br>3. tubP-GAL80ts, OK107-GAL4>UAS-mAChR-A-RNAi 1 31°C<br>4. tubP-GAL80ts, OK107-GAL4>UAS-mAChR-A-RNAi 1 23°C | 0.0008   | ***  |
|           |                       | Dunn's multiple comparisons test                   | 1. tubP-GAL80ts, OK107-GAL4<br>2. UAS-mAChR-A-RNAi 1                                                                                                                        | >0.9999  | n.s. |
|           |                       |                                                    | 1. tubP-GAL80ts, OK107-GAL4<br>2. tubP-GAL80ts, OK107-GAL4>UAS-mAChR-A-RNAi 1 31°C                                                                                          | 0.0056   | **   |
|           |                       |                                                    | 1. tubP-GAL80ts, OK107-GAL4<br>2. tubP-GAL80ts, OK107-GAL4>UAS-mAChR-A-RNAi 1 23°C                                                                                          | >0.9999  | n.s. |
|           |                       |                                                    | 1. UAS-mAChR-A-RNAi 1<br>2. tubP-GAL80ts, OK107-GAL4>UAS-mAChR-A-RNAi 1 31°C                                                                                                | 0.0064   | **   |
|           |                       |                                                    | 1. UAS-mAChR-A-RNAi 1<br>2. tubP-GAL80ts, OK107-GAL4>UAS-mAChR-A-RNAi 1 23°C                                                                                                | >0.9999  | n.s. |
|           |                       |                                                    | 1. tubP-GAL80ts, OK107-GAL4>UAS-mAChR-A-RNAi 1 31°C<br>2. tubP-GAL80ts, OK107-GAL4>UAS-mAChR-A-RNAi 1 23°C                                                                  | 0.0186   | *    |
| FIGURE 2B |                       | One way non parametric ANOVA - Kruskal-Wallis test | ANOVA<br>1. MB247-GAL4<br>2. UAS-mAChR-A-RNAi 1<br>3. MB247-GAL4>UAS-mAChR-A-RNAi 1                                                                                         | < 0.0001 | **** |
|           |                       | Dunn's multiple comparisons test                   | 1. MB247-GAL4                                                                                                                                                               | >0.9999  | n.s. |

|  |  |                                                       |                                                                                                                                               |         |      |
|--|--|-------------------------------------------------------|-----------------------------------------------------------------------------------------------------------------------------------------------|---------|------|
|  |  |                                                       | 2. UAS-mAChR-A-RNAi 1                                                                                                                         |         |      |
|  |  |                                                       | 1. MB247-GAL4<br>2. MB247-GAL4>UAS-mAChR-A-RNAi 1                                                                                             | 0.0003  | ***  |
|  |  |                                                       | 1. UAS-mAChR-A-RNAi 1<br>2. MB247-GAL4>UAS-mAChR-A-RNAi 1                                                                                     | 0.0003  | ***  |
|  |  | One way non parametric ANOVA -<br>Kruskal-Wallis test | ANOVA<br>1. c305a-GAL4<br>2. UAS-mAChR-A-RNAi 1<br>3. c305a-GAL4>UAS-mAChR-A-RNAi 1                                                           | 0.8664  | n.s. |
|  |  | Dunn's multiple comparisons test                      | 1. c305a-GAL4<br>2. UAS-mAChR-A-RNAi 1                                                                                                        | >0.9999 | n.s. |
|  |  |                                                       | 1. c305a-GAL4<br>2. OK107-GAL4>UAS-mAChR-A-RNAi 1                                                                                             | >0.9999 | n.s. |
|  |  |                                                       | 1. UAS-mAChR-A-RNAi 1<br>2. c305a-GAL4>UAS-mAChR-A-RNAi 1                                                                                     | >0.9999 | n.s. |
|  |  | One way non parametric ANOVA -<br>Kruskal-Wallis test | ANOVA<br>1. UAS-mAChR-A-RNAi 1<br>2. R45H04-lexA>LexAop-GAL80,<br>MB247-GAL4<br>3. R45H04-lexA>LexAop-GAL80,<br>MB247-GAL4>UAS-mAChR-A-RNAi 1 | 0.2981  | n.s. |
|  |  | Dunn's multiple comparisons test                      | 1. UAS-mAChR-A-RNAi 1<br>2. R45H04-lexA>LexAop-GAL80,<br>MB247-GAL4                                                                           | 0.4725  | n.s. |
|  |  |                                                       | 1. UAS-mAChR-A-RNAi 1<br>2. R45H04-lexA>LexAop-GAL80,<br>MB247-GAL4>UAS-mAChR-A-RNAi 1                                                        | 0.5203  | n.s. |
|  |  |                                                       | 1. R45H04-lexA>LexAop-GAL80,<br>MB247-GAL4<br>2. R45H04-lexA>LexAop-GAL80,<br>MB247-GAL4>UAS-mAChR-A-RNAi 1                                   | >0.9999 | n.s. |
|  |  | One way non parametric ANOVA -<br>Kruskal-Wallis test | ANOVA<br>1. UAS-mAChR-A-RNAi 1<br>2. R44E04-lexA>LexAop-GAL80,                                                                                | <0.0001 | **** |

|           |                                                  |                                     |                                                                                                              |          |      |
|-----------|--------------------------------------------------|-------------------------------------|--------------------------------------------------------------------------------------------------------------|----------|------|
|           |                                                  |                                     | MB247-GAL4,<br>3. R44E04-lexA>LexAop-GAL80,<br>MB247-GAL4>UAS-mAChR-A-RNAi 1                                 |          |      |
|           |                                                  | Dunn's multiple comparisons test    | 1. UAS-mAChR-A-RNAi 1<br>2. R44E04-lexA>LexAop-GAL80,<br>MB247-GAL4,                                         | >0.9999  | n.s. |
|           |                                                  |                                     | 1. UAS-mAChR-A-RNAi 1<br>2. R44E04-lexA>LexAop-GAL80,<br>MB247-GAL4>UAS-mAChR-A-RNAi 1                       | <0.0001  | **** |
|           |                                                  |                                     | 1. R44E04-lexA>LexAop-GAL80,<br>MB247-GAL4,<br>2. R44E04-lexA>LexAop-GAL80,<br>MB247-GAL4>UAS-mAChR-A-RNAi 1 | <0.0001  | **** |
| Figure 3B | KC responses to MCH with or without mAChR-A-RNAi | 2-way ANOVA                         | Main effect of genotype (OK107-GAL4, UAS-dcr2 vs. OK107-GAL4, UAS-dcr2, UAS-mAChR-A-RNAi 2)                  | < 0.0001 | **** |
|           |                                                  |                                     | Main effect of lobe ( $\alpha$ , $\alpha'$ , $\beta$ , $\beta'$ , $\gamma$ , calyx)                          | 0.0009   | ***  |
|           |                                                  |                                     | Interaction between genotype and lobe                                                                        | 0.7096   | n.s. |
|           |                                                  | Holm-Sidak multiple comparison test | dcr2 alone vs. mCAhR-A-RNAi 2, $\alpha'$ lobe                                                                | 0.0717   | n.s. |
|           |                                                  |                                     | dcr2 alone vs. mCAhR-A-RNAi 2, $\beta'$ lobe                                                                 | 0.0319   | n.s. |
|           |                                                  |                                     | dcr2 alone vs. mCAhR-A-RNAi 2, $\alpha$ lobe                                                                 | 0.016    | *    |
|           |                                                  |                                     | dcr2 alone vs. mCAhR-A-RNAi 2, $\beta$ lobe                                                                  | 0.0717   | n.s. |
|           |                                                  |                                     | dcr2 alone vs. mCAhR-A-RNAi 2, $\gamma$ lobe                                                                 | 0.0003   | ***  |
|           |                                                  |                                     | dcr2 alone vs. mCAhR-A-RNAi 2, calyx                                                                         | 0.0196   | *    |
|           | KC responses to OCT with or without mAChR-A-RNAi | 2-way ANOVA                         | Main effect of genotype (OK107-GAL4, UAS-dcr2 vs. OK107-GAL4, UAS-dcr2, UAS-mAChR-A-RNAi 2)                  | <0.0001  | **** |
|           |                                                  |                                     | Main effect of lobe ( $\alpha$ , $\alpha'$ , $\beta$ , $\beta'$ , $\gamma$ , calyx)                          | <0.0001  | **** |
|           |                                                  |                                     | Interaction between genotype and lobe                                                                        | 0.0086   | **   |
|           |                                                  | Holm-Sidak multiple comparison test | dcr2 alone vs. mCAhR-A-RNAi 2, $\alpha'$ lobe                                                                | 0.6018   | n.s. |
|           |                                                  |                                     | dcr2 alone vs. mCAhR-A-RNAi 2, $\beta'$ lobe                                                                 | 0.6018   | n.s. |

|           |                                                                                                             |                                                     |                                                        |         |      |
|-----------|-------------------------------------------------------------------------------------------------------------|-----------------------------------------------------|--------------------------------------------------------|---------|------|
|           |                                                                                                             |                                                     | dcr2 alone vs. mCAhR-A-RNAi 2, $\alpha$ lobe           | 0.5748  | n.s. |
|           |                                                                                                             |                                                     | dcr2 alone vs. mCAhR-A-RNAi 2, $\beta$ lobe            | 0.1481  | n.s. |
|           |                                                                                                             |                                                     | dcr2 alone vs. mCAhR-A-RNAi 2, $\gamma$ lobe           | 0.0007  | ***  |
|           |                                                                                                             |                                                     | dcr2 alone vs. mCAhR-A-RNAi 2, calyx                   | <0.0001 | **** |
| Figure 4B | Sparseness                                                                                                  | 2-way repeated measures ANOVA (paired across odors) | Main effect of genotype (dcr2 alone vs. mAChR-A-RNAi2) | 0.3811  | n.s. |
|           |                                                                                                             |                                                     | Main effect of odor (MCH vs OCT)                       | 0.0001  | ***  |
|           |                                                                                                             |                                                     | Interaction between genotype and odor                  | 0.9954  | n.s. |
|           |                                                                                                             | Holm-Sidak multiple comparison test                 | dcr2 alone vs. mAChR-A-RNAi 2, MCH                     | 0.691   | n.s. |
|           |                                                                                                             |                                                     | dcr2 alone vs. mAChR-A-RNAi 2, OCT                     | 0.691   | n.s. |
| Figure 4C | Correlation                                                                                                 | Unpaired t-test                                     | dcr2 alone vs. mAChR-A-RNAi 2                          | 0.7547  | n.s. |
| Figure 4F | $\gamma$ -only driver, KC responses with or without mAChR-A-RNAi - in gamma lobe and calyx, with MCH or OCT | 2-way repeated measures ANOVA                       | Main effect of genotype                                | 0.0004  | ***  |
|           |                                                                                                             | Holm-Sidak multiple comparison test                 | control vs. mAChR-A-RNAi 1, MCH, calyx                 | 0.0304  | *    |
|           |                                                                                                             |                                                     | control vs. mAChR-A-RNAi 1, OCT, calyx                 | 0.0013  | **   |
|           |                                                                                                             |                                                     | control vs. mAChR-A-RNAi 1, MCH, gamma lobe            | 0.8083  | n.s. |
|           |                                                                                                             |                                                     | control vs. mAChR-A-RNAi 1, OCT, gamma lobe            | 0.0262  | *    |
| Figure 4H | Sparseness, $\gamma$ KCs only                                                                               | 2-way repeated measures ANOVA (paired across odors) | Main effect of genotype (control vs. RNAi)             | 0.7693  | n.s. |
|           |                                                                                                             |                                                     | Main effect of odor (MCH vs OCT)                       | 0.3838  | n.s. |
|           |                                                                                                             |                                                     | Interaction between genotype and odor                  | 0.2621  | n.s. |
|           |                                                                                                             | Holm-Sidak multiple comparison test                 | control vs. RNAi, MCH                                  | 0.8908  | n.s. |
|           |                                                                                                             |                                                     | control vs. RNAi, OCT                                  | 0.3261  | n.s. |



|           |                                                                          |                                                                                                                 |                                                                                     |         |      |
|-----------|--------------------------------------------------------------------------|-----------------------------------------------------------------------------------------------------------------|-------------------------------------------------------------------------------------|---------|------|
| Figure 4I | Correlation                                                              | Unpaired Welch-corrected t-test                                                                                 | control vs. RNAi                                                                    | 0.3249  | n.s. |
| Figure 5B | KC responses to MCH before and after bath muscarine (Max. $\Delta F/F$ ) | 2-way repeated measures ANOVA (matching across drug treatment and across lobes)<br>n = 11 hemispheres (6 flies) | Main effect of muscarine treatment                                                  | <0.0001 | **** |
|           |                                                                          |                                                                                                                 | Main effect of lobe ( $\alpha$ , $\alpha'$ , $\beta$ , $\beta'$ , $\gamma$ , calyx) | 0.5052  | n.s. |
|           |                                                                          |                                                                                                                 | Interaction between muscarine and lobe                                              | 0.0166  | *    |
|           |                                                                          | Holm-Sidak multiple comparison test                                                                             | before vs. +muscarine, calyx                                                        | 0.0205  | *    |
|           |                                                                          |                                                                                                                 | before vs. +muscarine, $\alpha'$ lobe                                               | <0.0001 | **** |
|           |                                                                          |                                                                                                                 | before vs. +muscarine, $\beta'$ lobe                                                | <0.0001 | **** |
|           |                                                                          |                                                                                                                 | before vs. +muscarine, $\alpha$ lobe                                                | <0.0001 | **** |
|           |                                                                          |                                                                                                                 | before vs. +muscarine, $\beta$ lobe                                                 | 0.0011  | **   |
|           |                                                                          |                                                                                                                 | before vs. +muscarine, $\gamma$ lobe                                                | <0.0001 | **** |
|           | KC responses to OCT before and after bath muscarine (Max. $\Delta F/F$ ) | 2-way repeated measures ANOVA (matching across drug treatment and across lobes)<br>n = 11 hemispheres (6 flies) | Main effect of muscarine treatment                                                  | 0.0007  | ***  |
|           |                                                                          |                                                                                                                 | Main effect of lobe ( $\alpha$ , $\alpha'$ , $\beta$ , $\beta'$ , $\gamma$ , calyx) | 0.0448  | *    |
|           |                                                                          |                                                                                                                 | Interaction between muscarine and lobe                                              | 0.582   | n.s. |
|           |                                                                          | Holm-Sidak multiple comparison test                                                                             | before vs. +muscarine, calyx                                                        | 0.0002  | ***  |
|           |                                                                          |                                                                                                                 | before vs. +muscarine, $\alpha'$ lobe                                               | <0.0001 | **** |
|           |                                                                          |                                                                                                                 | before vs. +muscarine, $\beta'$ lobe                                                | <0.0001 | **** |
|           |                                                                          |                                                                                                                 | before vs. +muscarine, $\alpha$ lobe                                                | <0.0001 | ***  |
|           |                                                                          |                                                                                                                 | before vs. +muscarine, $\beta$ lobe                                                 | <0.0001 | **** |
|           |                                                                          |                                                                                                                 | before vs. +muscarine, $\gamma$ lobe                                                | 0.0012  | **   |

|           |                                                          |                                                                         |                                                                                                                                                                    |         |      |
|-----------|----------------------------------------------------------|-------------------------------------------------------------------------|--------------------------------------------------------------------------------------------------------------------------------------------------------------------|---------|------|
| Figure 5C | PN responses in calyx                                    | 2-way repeated measures ANOVA (matching across drug treatment and odor) | Main effect of odor                                                                                                                                                | 0.8587  | n.s. |
|           |                                                          |                                                                         | Main effect of muscarine treatment                                                                                                                                 | 0.4955  | n.s. |
|           |                                                          |                                                                         | Interaction between odor and treatment                                                                                                                             | 0.2699  | n.s. |
|           |                                                          | Individual paired t-test for MCH (compare to power analysis below)      |                                                                                                                                                                    | 0.1951  | n.s. |
|           |                                                          | Individual paired t-test for OCT (compare to power analysis below)      |                                                                                                                                                                    | 0.7406  | n.s. |
|           |                                                          | Power analysis                                                          | The effect size of muscarine treatment on the $\gamma$ lobe's MCH response is 2.02. $n = 5$ gives 97% chance of detecting such a large effect with a paired t-test |         |      |
| Figure 5D | KC responses with muscarine, APL unlabeled control - MCH | 2-way repeated measures ANOVA (matching across drug treatment and lobe) | Main effect of muscarine treatment                                                                                                                                 | 0.0024  | **   |
|           |                                                          |                                                                         | Main effect of lobe ( $\alpha$ , $\alpha'$ , $\beta$ , $\beta'$ , $\gamma$ , calyx)                                                                                | 0.1006  | n.s. |
|           |                                                          |                                                                         | Interaction between muscarine and lobe                                                                                                                             | 0.4808  | n.s. |
|           |                                                          | Holm-Sidak multiple comparison test                                     | before vs. +muscarine, calyx                                                                                                                                       | <0.0001 | **** |
|           |                                                          |                                                                         | before vs. +muscarine, $\alpha'$ lobe                                                                                                                              | 0.0039  | **   |
|           |                                                          |                                                                         | before vs. +muscarine, $\beta'$ lobe                                                                                                                               | 0.0007  | ***  |
|           |                                                          |                                                                         | before vs. +muscarine, $\alpha$ lobe                                                                                                                               | <0.0001 | **** |
|           |                                                          |                                                                         | before vs. +muscarine, $\beta$ lobe                                                                                                                                | 0.0002  | ***  |
|           |                                                          |                                                                         | before vs. +muscarine, $\gamma$ lobe                                                                                                                               | 0.0002  | ***  |
|           | KC responses with muscarine, APL unlabeled control - OCT | 2-way repeated measures ANOVA (matching across drug treatment and lobe) | Main effect of muscarine treatment                                                                                                                                 | 0.0564  | n.s. |
|           |                                                          |                                                                         | Main effect of lobe ( $\alpha$ , $\alpha'$ , $\beta$ , $\beta'$ , $\gamma$ , calyx)                                                                                | 0.0107  | n.s. |
|           |                                                          |                                                                         | Interaction between muscarine and lobe                                                                                                                             | 0.2393  | n.s. |

|        |                                            |                                                                         |                                                                                     |         |      |
|--------|--------------------------------------------|-------------------------------------------------------------------------|-------------------------------------------------------------------------------------|---------|------|
|        |                                            | Holm-Sidak multiple comparison test                                     | before vs. +muscarine, calyx                                                        | <0.0001 | **** |
|        |                                            |                                                                         | before vs. +muscarine, $\alpha'$ lobe                                               | 0.0006  | ***  |
|        |                                            |                                                                         | before vs. +muscarine, $\beta'$ lobe                                                | 0.0057  | **   |
|        |                                            |                                                                         | before vs. +muscarine, $\alpha$ lobe                                                | <0.0001 | **** |
|        |                                            |                                                                         | before vs. +muscarine, $\beta$ lobe                                                 | <0.0001 | **** |
|        |                                            |                                                                         | before vs. +muscarine, $\gamma$ lobe                                                | 0.0009  | ***  |
|        | KC responses with muscarine, APL>TNT - MCH | 2-way repeated measures ANOVA (matching across drug treatment and lobe) | Main effect of muscarine treatment                                                  | 0.0023  | **   |
|        |                                            |                                                                         | Main effect of lobe ( $\alpha$ , $\alpha'$ , $\beta$ , $\beta'$ , $\gamma$ , calyx) | 0.0156  | *    |
|        |                                            |                                                                         | Interaction between muscarine and lobe                                              | 0.0908  | n.s. |
|        |                                            | Holm-Sidak multiple comparison test                                     | before vs. +muscarine, calyx                                                        | 0.0107  | *    |
|        |                                            |                                                                         | before vs. +muscarine, $\alpha'$ lobe                                               | <0.0001 | **** |
|        |                                            |                                                                         | before vs. +muscarine, $\beta'$ lobe                                                | <0.0001 | **** |
|        |                                            |                                                                         | before vs. +muscarine, $\alpha$ lobe                                                | 0.0035  | **   |
|        |                                            |                                                                         | before vs. +muscarine, $\beta$ lobe                                                 | 0.0035  | **   |
|        |                                            |                                                                         | before vs. +muscarine, $\gamma$ lobe                                                | 0.0031  | **   |
|        | KC responses with muscarine, APL>TNT - OCT | 2-way repeated measures ANOVA (matching across drug treatment and lobe) | Main effect of muscarine treatment                                                  | <0.0001 | **** |
|        |                                            |                                                                         | Main effect of lobe ( $\alpha$ , $\alpha'$ , $\beta$ , $\beta'$ , $\gamma$ , calyx) | 0.0001  | ***  |
|        |                                            |                                                                         | Interaction between muscarine and lobe                                              | 0.0128  | *    |
|        |                                            | Holm-Sidak multiple comparison test                                     | before vs. +muscarine, calyx                                                        | 0.0002  | ***  |
|        |                                            |                                                                         | before vs. +muscarine, $\alpha'$ lobe                                               | <0.0001 | **** |
|        |                                            |                                                                         | before vs. +muscarine, $\beta'$ lobe                                                | <0.0001 | **** |
|        |                                            |                                                                         | before vs. +muscarine, $\alpha$ lobe                                                | <0.0001 | **** |
|        |                                            |                                                                         | before vs. +muscarine, $\beta$ lobe                                                 | <0.0001 | **** |
|        |                                            |                                                                         | before vs. +muscarine, $\gamma$ lobe                                                | 0.0006  | ***  |
| Figure | (KC response after                         | 2-way repeated                                                          | Main effect of tetanus toxin expression (APL                                        | 0.1541  | n.s. |

|           |                                                                                  |                                                                  |                                                                                     |        |      |
|-----------|----------------------------------------------------------------------------------|------------------------------------------------------------------|-------------------------------------------------------------------------------------|--------|------|
| 5E        | muscarine) / (KC response before muscarine), MCH                                 | measures ANOVA (matching across lobe)                            | unlabeled vs. APL>TNT)                                                              |        |      |
|           |                                                                                  |                                                                  | Main effect of lobe ( $\alpha$ , $\alpha'$ , $\beta$ , $\beta'$ , $\gamma$ , calyx) | 0.3694 | n.s. |
|           |                                                                                  |                                                                  | Interaction between lobe and tetanus toxin expression                               | 0.0229 | *    |
|           |                                                                                  | Holm-Sidak multiple comparison test                              | APL unlabeled vs. APL>TNT, calyx                                                    | 0.2367 | n.s. |
|           |                                                                                  |                                                                  | APL unlabeled vs. APL>TNT, $\alpha'$ lobe                                           | 0.5099 | n.s. |
|           |                                                                                  |                                                                  | APL unlabeled vs. APL>TNT, $\beta'$ lobe                                            | 0.8107 | n.s. |
|           |                                                                                  |                                                                  | APL unlabeled vs. APL>TNT, $\alpha$ lobe                                            | 0.3311 | n.s. |
|           |                                                                                  |                                                                  | APL unlabeled vs. APL>TNT, $\beta$ lobe                                             | 0.8107 | n.s. |
|           |                                                                                  |                                                                  | APL unlabeled vs. APL>TNT, $\gamma$ lobe                                            | 0.0532 | n.s. |
|           | (KC response after muscarine) / (KC response before muscarine), OCT              | 2-way repeated measures ANOVA (matching across lobe)             | Main effect of tetanus toxin expression (APL unlabeled vs. APL>TNT)                 | 0.5607 | n.s. |
|           |                                                                                  |                                                                  | Main effect of lobe ( $\alpha$ , $\alpha'$ , $\beta$ , $\beta'$ , $\gamma$ , calyx) | 0.3210 | n.s. |
|           |                                                                                  |                                                                  | Interaction between lobe and tetanus toxin expression                               | 0.1278 | n.s. |
|           |                                                                                  | Holm-Sidak multiple comparison test                              | APL unlabeled vs. APL>TNT, calyx                                                    | 0.9787 | n.s. |
|           |                                                                                  |                                                                  | APL unlabeled vs. APL>TNT, $\alpha'$ lobe                                           | 0.8786 | n.s. |
|           |                                                                                  |                                                                  | APL unlabeled vs. APL>TNT, $\beta'$ lobe                                            | 0.8786 | n.s. |
|           |                                                                                  |                                                                  | APL unlabeled vs. APL>TNT, $\alpha$ lobe                                            | 0.8786 | n.s. |
|           |                                                                                  |                                                                  | APL unlabeled vs. APL>TNT, $\beta$ lobe                                             | 0.8786 | n.s. |
|           |                                                                                  |                                                                  | APL unlabeled vs. APL>TNT, $\gamma$ lobe                                            | 0.8786 | n.s. |
| Figure 6C | Picospritzing muscarine on lobe, mean $\Delta F/F$ 0.5 – 1.5 s after application | One-sample t test - hypothetical value 0 - Bonferroni correction | Muscarine calyx                                                                     | >0.99  | n.s. |

|           |                                                                                         |                                                                                     |                                                                                     |        |      |
|-----------|-----------------------------------------------------------------------------------------|-------------------------------------------------------------------------------------|-------------------------------------------------------------------------------------|--------|------|
|           |                                                                                         |                                                                                     | Muscarine response $\alpha'$ lobe                                                   | >0.99  | n.s. |
|           |                                                                                         |                                                                                     | Muscarine response $\beta'$ lobe                                                    | >0.99  | n.s. |
|           |                                                                                         |                                                                                     | Muscarine response $\alpha$ lobe                                                    | 0.4482 | n.s. |
|           |                                                                                         |                                                                                     | Muscarine response $\beta$ lobe                                                     | 0.0348 | *    |
|           |                                                                                         |                                                                                     | Muscarine response $\gamma$ lobe                                                    | 0.0012 | **   |
| Figure 6D | Picospritzing muscarine on lobe, mean $\Delta F/F$ 3 - 4 s after application            | One-sample Wilcoxon signed-rank test - hypothetical value 0 - Bonferroni correction | Muscarine calyx                                                                     | >0.99  | n.s. |
|           |                                                                                         |                                                                                     | Muscarine response $\alpha'$ lobe                                                   | 0.0402 | *    |
|           |                                                                                         |                                                                                     | Muscarine response $\beta'$ lobe                                                    | 0.0054 | **   |
|           |                                                                                         |                                                                                     | Muscarine response $\alpha$ lobe                                                    | 0.1812 | n.s. |
|           |                                                                                         |                                                                                     | Muscarine response $\beta$ lobe                                                     | 0.2118 | n.s. |
|           |                                                                                         |                                                                                     | Muscarine response $\gamma$ lobe                                                    | 0.2118 | n.s. |
| Figure 6E | Picospritzing muscarine on calyx, mean $\Delta F/F$ 0 - 1 s after application           | One-sample t test - hypothetical value 0 - Bonferroni correction                    | Muscarine response calyx                                                            | 0.039  | *    |
|           |                                                                                         |                                                                                     | Muscarine response $\alpha'$ lobe                                                   | >0.99  | n.s. |
|           |                                                                                         |                                                                                     | Muscarine response $\beta'$ lobe                                                    | >0.99  | n.s. |
|           |                                                                                         |                                                                                     | Muscarine response $\alpha$ lobe                                                    | 0.027  | *    |
|           |                                                                                         |                                                                                     | Muscarine response $\beta$ lobe                                                     | >0.99  | n.s. |
|           |                                                                                         |                                                                                     | Muscarine response $\gamma$ lobe                                                    | 0.576  | n.s. |
| Figure 6G | KC responses to MCH before and after muscarine puff on horizontal lobe on opposite side | 2-way repeated measures ANOVA (matching across drug treatment and lobe)             | Main effect of muscarine treatment                                                  | 0.3065 | n.s. |
|           |                                                                                         |                                                                                     | Main effect of lobe ( $\alpha$ , $\alpha'$ , $\beta$ , $\beta'$ , $\gamma$ , calyx) | 0.0651 | n.s. |
|           |                                                                                         |                                                                                     | Interaction between muscarine and lobe                                              | 0.6985 | n.s. |
|           |                                                                                         | Holm-Sidak multiple                                                                 | before vs. +muscarine, calyx                                                        | 0.546  | n.s. |

|  |                                                                                         |                                                                        |                                                                                     |        |      |
|--|-----------------------------------------------------------------------------------------|------------------------------------------------------------------------|-------------------------------------------------------------------------------------|--------|------|
|  |                                                                                         | comparisons test                                                       |                                                                                     |        |      |
|  |                                                                                         |                                                                        | before vs. +muscarine, $\alpha'$ lobe                                               | 0.7604 | n.s. |
|  |                                                                                         |                                                                        | before vs. +muscarine, $\beta'$ lobe                                                | 0.338  | n.s. |
|  |                                                                                         |                                                                        | before vs. +muscarine, $\alpha$ lobe                                                | 0.8656 | n.s. |
|  |                                                                                         |                                                                        | before vs. +muscarine, $\beta$ lobe                                                 | 0.6704 | n.s. |
|  |                                                                                         |                                                                        | before vs. +muscarine, $\gamma$ lobe                                                | 0.338  | n.s. |
|  | KC responses to OCT before and after muscarine puff on horizontal lobe on opposite side | 2-way repeated measures ANOVA (matching across drug treatment and lobe | Main effect of muscarine treatment                                                  | 0.1581 | n.s. |
|  |                                                                                         |                                                                        | Main effect of lobe ( $\alpha$ , $\alpha'$ , $\beta$ , $\beta'$ , $\gamma$ , calyx) | 0.012  | *    |
|  |                                                                                         |                                                                        | Interaction between muscarine and lobe                                              | 0.4951 | n.s. |
|  |                                                                                         | Holm-Sidak multiple comparisons test                                   | before vs. +muscarine, calyx                                                        | 0.0381 | *    |
|  |                                                                                         |                                                                        | before vs. +muscarine, $\alpha'$ lobe                                               | 0.6358 | n.s. |
|  |                                                                                         |                                                                        | before vs. +muscarine, $\beta'$ lobe                                                | 0.6358 | n.s. |
|  |                                                                                         |                                                                        | before vs. +muscarine, $\alpha$ lobe                                                | 0.8239 | n.s. |
|  |                                                                                         |                                                                        | before vs. +muscarine, $\beta$ lobe                                                 | 0.1775 | n.s. |
|  |                                                                                         |                                                                        | before vs. +muscarine, $\gamma$ lobe                                                | 0.8239 | n.s. |
|  | KC responses to MCH before and after muscarine puff on horizontal lobe on same side     | 2-way repeated measures ANOVA (matching across drug treatment and lobe | Main effect of muscarine treatment                                                  | 0.1934 | n.s. |
|  |                                                                                         |                                                                        | Main effect of lobe ( $\alpha$ , $\alpha'$ , $\beta$ , $\beta'$ , $\gamma$ , calyx) | 0.0145 | *    |
|  |                                                                                         |                                                                        | Interaction between muscarine and lobe                                              | 0.3161 | n.s. |
|  |                                                                                         | Holm-Sidak multiple comparisons test                                   | before vs. +muscarine, calyx                                                        | 0.6188 | n.s. |
|  |                                                                                         |                                                                        | before vs. +muscarine, $\alpha'$ lobe                                               | 0.9287 | n.s. |

|  |                                                                                     |                                                                        |                                                                                     |         |      |
|--|-------------------------------------------------------------------------------------|------------------------------------------------------------------------|-------------------------------------------------------------------------------------|---------|------|
|  |                                                                                     |                                                                        | before vs. +muscarine, $\beta'$ lobe                                                | 0.9287  | n.s. |
|  |                                                                                     |                                                                        | before vs. +muscarine, $\alpha$ lobe                                                | 0.7508  | n.s. |
|  |                                                                                     |                                                                        | before vs. +muscarine, $\beta$ lobe                                                 | 0.0477  | *    |
|  |                                                                                     |                                                                        | before vs. +muscarine, $\gamma$ lobe                                                | 0.0366  | *    |
|  | KC responses to OCT before and after muscarine puff on horizontal lobe on same side | 2-way repeated measures ANOVA (matching across drug treatment and lobe | Main effect of muscarine treatment                                                  | 0.0006  | ***  |
|  |                                                                                     |                                                                        | Main effect of lobe ( $\alpha$ , $\alpha'$ , $\beta$ , $\beta'$ , $\gamma$ , calyx) | <0.0001 | ***  |
|  |                                                                                     |                                                                        | Interaction between muscarine and lobe                                              | 0.4972  | n.s. |
|  |                                                                                     | Holm-Sidak multiple comparisons test                                   | before vs. +muscarine, calyx                                                        | 0.0042  | **   |
|  |                                                                                     |                                                                        | before vs. +muscarine, $\alpha'$ lobe                                               | 0.0048  | **   |
|  |                                                                                     |                                                                        | before vs. +muscarine, $\beta'$ lobe                                                | <0.0001 | ***  |
|  |                                                                                     |                                                                        | before vs. +muscarine, $\alpha$ lobe                                                | <0.0001 | ***  |
|  |                                                                                     |                                                                        | before vs. +muscarine, $\beta$ lobe                                                 | 0.0001  | ***  |
|  |                                                                                     |                                                                        | before vs. +muscarine, $\gamma$ lobe                                                | <0.0001 | ***  |
|  | KC responses to MCH before and after muscarine puff on calyx on opposite side       | 2-way repeated measures ANOVA (matching across drug treatment and lobe | Main effect of muscarine treatment                                                  | 0.3349  | n.s. |
|  |                                                                                     |                                                                        | Main effect of lobe ( $\alpha$ , $\alpha'$ , $\beta$ , $\beta'$ , $\gamma$ , calyx) | 0.1905  | n.s. |
|  |                                                                                     |                                                                        | Interaction between muscarine and lobe                                              | 0.2388  | n.s. |
|  |                                                                                     | Holm-Sidak multiple comparisons test                                   | before vs. +muscarine, calyx                                                        | 0.8860  | n.s. |
|  |                                                                                     |                                                                        | before vs. +muscarine, $\alpha'$ lobe                                               | 0.9441  | n.s. |
|  |                                                                                     |                                                                        | before vs. +muscarine, $\beta'$ lobe                                                | 0.9441  | n.s. |
|  |                                                                                     |                                                                        | before vs. +muscarine, $\alpha$ lobe                                                | 0.9441  | n.s. |

|  |                                                                               |                                                                              |                                                                                     |        |      |
|--|-------------------------------------------------------------------------------|------------------------------------------------------------------------------|-------------------------------------------------------------------------------------|--------|------|
|  |                                                                               |                                                                              | before vs. +muscarine, $\beta$ lobe                                                 | 0.0158 | *    |
|  |                                                                               |                                                                              | before vs. +muscarine, $\gamma$ lobe                                                | 0.7936 | n.s. |
|  | KC responses to OCT before and after muscarine puff on calyx on opposite side | 2-way repeated measures ANOVA (matching across drug treatment and lobe side) | Main effect of muscarine treatment                                                  | 0.3984 | n.s. |
|  |                                                                               |                                                                              | Main effect of lobe ( $\alpha$ , $\alpha'$ , $\beta$ , $\beta'$ , $\gamma$ , calyx) | 0.3595 | n.s. |
|  |                                                                               |                                                                              | Interaction between muscarine and lobe                                              | 0.3699 | n.s. |
|  |                                                                               | Holm-Sidak multiple comparisons test                                         | before vs. +muscarine, calyx                                                        | 0.9403 | n.s. |
|  |                                                                               |                                                                              | before vs. +muscarine, $\alpha'$ lobe                                               | 0.9313 | n.s. |
|  |                                                                               |                                                                              | before vs. +muscarine, $\beta'$ lobe                                                | 0.8593 | n.s. |
|  |                                                                               |                                                                              | before vs. +muscarine, $\alpha$ lobe                                                | 0.3680 | n.s. |
|  |                                                                               |                                                                              | before vs. +muscarine, $\beta$ lobe                                                 | 0.5733 | n.s. |
|  |                                                                               |                                                                              | before vs. +muscarine, $\gamma$ lobe                                                | 0.8593 | n.s. |
|  | KC responses to MCH before and after muscarine puff on calyx on same side     | 2-way repeated measures ANOVA (matching across drug treatment and lobe side) | Main effect of muscarine treatment                                                  | 0.0227 | *    |
|  |                                                                               |                                                                              | Main effect of lobe ( $\alpha$ , $\alpha'$ , $\beta$ , $\beta'$ , $\gamma$ , calyx) | 0.1291 | n.s. |
|  |                                                                               |                                                                              | Interaction between muscarine and lobe                                              | 0.2751 | n.s. |
|  |                                                                               | Holm-Sidak multiple comparisons test                                         | before vs. +muscarine, calyx                                                        | 0.5295 | n.s. |
|  |                                                                               |                                                                              | before vs. +muscarine, $\alpha'$ lobe                                               | 0.0048 | **   |
|  |                                                                               |                                                                              | before vs. +muscarine, $\beta'$ lobe                                                | 0.0624 | n.s. |
|  |                                                                               |                                                                              | before vs. +muscarine, $\alpha$ lobe                                                | 0.5295 | n.s. |
|  |                                                                               |                                                                              | before vs. +muscarine, $\beta$ lobe                                                 | 0.0400 | *    |
|  |                                                                               |                                                                              | before vs. +muscarine, $\gamma$ lobe                                                | 0.2561 | n.s. |
|  | KC responses to                                                               | 2-way repeated                                                               | Main effect of muscarine treatment                                                  | 0.0004 | ***  |



|           |                                                           |                                                               |                                                                                                                          |         |      |
|-----------|-----------------------------------------------------------|---------------------------------------------------------------|--------------------------------------------------------------------------------------------------------------------------|---------|------|
|           | OCT before and after muscarine puff on calyx on same side | measures ANOVA (matching across drug treatment and lobe side) |                                                                                                                          |         |      |
|           |                                                           |                                                               | Main effect of lobe ( $\alpha$ , $\alpha'$ , $\beta$ , $\beta'$ , $\gamma$ , calyx)                                      | 0.0034  | **   |
|           |                                                           |                                                               | Interaction between muscarine and lobe                                                                                   | <0.0001 | **** |
|           |                                                           | Holm-Sidak multiple comparisons test                          | before vs. +muscarine, calyx                                                                                             | 0.2421  | n.s. |
|           |                                                           |                                                               | before vs. +muscarine, $\alpha'$ lobe                                                                                    | <0.0001 | **** |
|           |                                                           |                                                               | before vs. +muscarine, $\beta'$ lobe                                                                                     | <0.0001 | **** |
|           |                                                           |                                                               | before vs. +muscarine, $\alpha$ lobe                                                                                     | 0.2421  | n.s. |
|           |                                                           |                                                               | before vs. +muscarine, $\beta$ lobe                                                                                      | 0.0005  | ***  |
|           |                                                           |                                                               | before vs. +muscarine, $\gamma$ lobe                                                                                     | 0.0075  | **   |
| Figure 7A | Behavior 90V                                              | One way non parametric ANOVA - Kruskal-Wallis test            | ANOVA<br>1. OK107-GAL4<br>2. UAS-mAChR-A-RNAi 1<br>3. OK107-GAL4>UAS-mAChR-A-RNAi 1                                      | 0.1309  | n.s. |
|           |                                                           | Dunn's multiple comparisons test                              | 1. OK107-GAL4<br>2. UAS-mAChR-A-RNAi 1                                                                                   | 0.3904  | n.s. |
|           |                                                           |                                                               | 1. OK107-GAL4<br>2. OK107-GAL4>UAS-mAChR-A-RNAi 1                                                                        | >0.9999 | n.s. |
|           |                                                           |                                                               | 1. UAS-mAChR-A-RNAi 1<br>2. OK107-GAL4>UAS-mAChR-A-RNAi 1                                                                | 0.1605  | n.s. |
| Figure 7B | MBON odor responses                                       | Mann Whitney test                                             | Ratio between OCT and MCH odor responses.<br>1. OK107, R12G04>GCaMP - mock training<br>2. OK107, R12G04>GCaMP - training | 0.0318  | *    |
|           |                                                           | Mann Whitney test                                             | Ratio between OCT and MCH odor responses.<br>1. OK107>DM type A RNAi, R12G04>GCaMP - mock training                       | 0.2571  | n.s. |

|            |          |                                                     |                                                                                                                                                                                                                                          |          |      |
|------------|----------|-----------------------------------------------------|------------------------------------------------------------------------------------------------------------------------------------------------------------------------------------------------------------------------------------------|----------|------|
|            |          |                                                     | 2. OK107>DM type A RNAi,<br>R12G04>GCaMP - training                                                                                                                                                                                      |          |      |
| Figure S1A | Behavior | One sample t-test                                   | 1. OK107-GAL4                                                                                                                                                                                                                            | 0.3900   | n.s. |
|            |          |                                                     | 1. UAS-mAChR-A-RNAi 1                                                                                                                                                                                                                    | 0.3595   | n.s. |
|            |          |                                                     | 1. OK107-GAL4>UAS-mAChR-A-RNAi 1                                                                                                                                                                                                         | 0.3305   | n.s. |
| Figure S1B | Behavior | Mann Whitney test<br>Bonferroni multiple comparison | 1. OK107-GAL4                                                                                                                                                                                                                            | 0.0246   | *    |
|            |          |                                                     | 1. UAS-mAChR-A-RNAi 1                                                                                                                                                                                                                    | <0.0001  | **** |
|            |          |                                                     | 1. OK107-GAL4>UAS-mAChR-A-RNAi 1                                                                                                                                                                                                         | 0.0018   | **   |
|            |          | 2-way ANOVA                                         | Main effect of genotype<br>1. OK107-GAL4<br>2. UAS-mAChR-A-RNAi 1<br>3. OK107-GAL4, UAS-mAChR-A-RNAi 1                                                                                                                                   | 0.2687   | n.s. |
|            |          |                                                     | Main effect of shock<br>1. Shock<br>2. Mock training                                                                                                                                                                                     | <0.0001  | **** |
|            |          |                                                     | Interaction<br>1. OK107-GAL4, shock<br>2. OK107-GAL4, mock training<br>3. UAS-mAChR-A-RNAi 1, shock<br>4. UAS-mAChR-A-RNAi 1, mock training<br>5. OK107-GAL4, UAS-mAChR-A-RNAi 1, shock<br>OK107-GAL4, UAS-mAChR-A-RNAi 1, mock training | < 0.0001 | **** |
|            |          | 2-way ANOVA                                         | Main effect of genotype<br>1. OK107-GAL4<br>2. OK107-GAL4, UAS-mAChR-A-RNAi 1                                                                                                                                                            | 0.1052   | n.s. |
|            |          |                                                     | Main effect of shock<br>1. Shock<br>2. Mock training                                                                                                                                                                                     | <0.0001  | **** |
|            |          |                                                     | Interaction                                                                                                                                                                                                                              | 0.4352   | n.s. |

|  |  |  |                                                                                                                                                                                                                         |  |  |
|--|--|--|-------------------------------------------------------------------------------------------------------------------------------------------------------------------------------------------------------------------------|--|--|
|  |  |  | <ol style="list-style-type: none"><li>1. OK107-GAL4, shock</li><li>2. OK107-GAL4, mock training</li><li>3. OK107-GAL4, UAS-mAChR-A-RNAi<br/>1, shock</li></ol> <p>OK107-GAL4, UAS-mAChR-A-RNAi<br/>1, mock training</p> |  |  |
|--|--|--|-------------------------------------------------------------------------------------------------------------------------------------------------------------------------------------------------------------------------|--|--|

**Table S2: Detailed genotypes used in this study**

| Figure | Shorthand                                             | Full genotype                                                                                                                                                                                                                                                                                                                                                                                                                                              |
|--------|-------------------------------------------------------|------------------------------------------------------------------------------------------------------------------------------------------------------------------------------------------------------------------------------------------------------------------------------------------------------------------------------------------------------------------------------------------------------------------------------------------------------------|
| 1A, S1 | N/A                                                   | <i>elav-GAL4/+</i> or <i>Y</i><br><i>UAS-mAChR-A-RNAi 1/+</i><br><i>elav-GAL4/+</i> or <i>Y; +; UAS-mAChR-A-RNAi 1/+</i><br><i>UAS-dcr2/+; UAS-mAChR-A-RNAi 2/+</i><br><i>elav-GAL4/+</i> or <i>Y; UAS-dcr2/+; UAS-mAChR-A-RNAi 2/+</i>                                                                                                                                                                                                                    |
| 1B,C   | N/A                                                   | <i>OK107-GAL4/+</i><br><i>UAS-mAChR-A-RNAi 1/+</i><br><i>UAS-mAChR-A-RNAi 1/+; +; OK107-GAL4/+</i><br><i>UAS-dcr2/+; UAS-mAChR-A-RNAi 2/+</i><br><i>UAS-dcr2/+; UAS-mAChR-A-RNAi 2/+; OK107-GAL4/+</i>                                                                                                                                                                                                                                                     |
| 1E     | N/A                                                   | <i>tub-GAL80<sup>ts</sup>/+; +; OK107-GAL4/+</i><br><i>UAS-mAChR-A-RNAi 1/+</i><br><i>tub-GAL80<sup>ts</sup>/+; UAS-mAChR-A-RNAi 1/+; OK107-GAL4/+</i>                                                                                                                                                                                                                                                                                                     |
| 2A     | N/A                                                   | <i>MiMIC-mAChR-A-GAL4; 20xUAS-6xGFP</i>                                                                                                                                                                                                                                                                                                                                                                                                                    |
| 2B     | N/A                                                   | <i>UAS-mAChR-A-RNAi 1/+</i><br><i>mb247-GAL4/+</i><br><i>mb247-GAL4/UAS-mAChR-A-RNAi 1</i><br><i>c305a-GAL4/+</i><br><i>c305a-GAL4/+; UAS-mAChR-A-RNAi 1/+</i><br><i>{lexAop-GAL80}su(Hw)attP5/R45H04-LexA; mb247-GAL4/+</i><br><i>{lexAop-GAL80}su(Hw)attP5)/R45H04-LexA; mb247-GAL4/UAS-mAChR-A-RNAi 1</i><br><i>{lexAop-GAL80}su(Hw)attP5)/R44E04-LexA; mb247-GAL4/+</i><br><i>{lexAop-GAL80}su(Hw)attP5/R44E04-LexA; mb247-GAL4/UAS-mAChR-A-RNAi 1</i> |
| 3,4    | OK107-GAL4>GCaMP6f, dcr2                              | <i>{UAS-GCaMP6f}attP40/UAS-dcr2; +; OK107-GAL4/+</i>                                                                                                                                                                                                                                                                                                                                                                                                       |
| 3,4    | OK107-GAL4>GCaMP6f, dcr2, mAChR-A-RNAi 2              | <i>{UAS-GCaMP6f}attP40/UAS-dcr2; UAS-mAChR-A-RNAi 2/+; OK107-GAL4/+</i>                                                                                                                                                                                                                                                                                                                                                                                    |
| 4      | mb247-GAL4>GCaMP6f, R44E04-LexA>Gal80                 | <i>{lexAop-GAL80}su(Hw)attP5, {UAS-GCaMP6f}attP40/R44E04-LexA; mb247-GAL4/+</i>                                                                                                                                                                                                                                                                                                                                                                            |
| 4      | mb247-GAL4>GCaMP6f, mAChR-A-RNAi 1, R44E04-LexA>Gal80 | <i>{lexAop-GAL80}su(Hw)attP5, {UAS-GCaMP6f}attP40/R44E04-LexA; mb247-GAL4/UAS-mAChR-A-RNAi 1</i>                                                                                                                                                                                                                                                                                                                                                           |

|             |                                                             |                                                                                                  |
|-------------|-------------------------------------------------------------|--------------------------------------------------------------------------------------------------|
| 5A,B, 6, S4 | OK107-GAL4>GCaMP6f                                          | {UAS-GCaMP6f}attP40/+; +; OK107-GAL4/+                                                           |
| 5C          | GH146-GAL4>GCaMP6f                                          | GH146-GAL4/+; UAS-GCaMP6f/+                                                                      |
| 5D, S4      | APL unlabeled, APL>TNT                                      | NP2631-GAL4, GH146-FLP/tub-FRT-GAL80-FRT, UAS-mCherry, UAS-TNT; mb247-LexA, lexAop-GCaMP6f/+     |
| 7           | OK107-GAL4, R12G04-LexA>GCaMP6f, mb247-dsRed                | {R12G04-LexA}attP40/{lexAop-GCaMP6f}su(Hw)attP5, mb247-dsRed; +; OK107-GAL4/+                    |
| 7           | OK107-GAL4>mAChR-A-RNAi 1, R12G04-LexA>GCaMP6f, mb247-dsRed | {R12G04-LexA}attP40/{lexAop-GCaMP6f}su(Hw)attP5, mb247-dsRed; UAS-mAChR-A-RNAi 1/+; OK107-GAL4/+ |
| S3          | OK107-GAL4>UAS-GFP                                          | +; UAS-mCD8-GFP/+; OK107-GAL4/+                                                                  |
| S3          | MB247-GAL4>UAS-GFP                                          | +; UAS-mCD8-GFP/mb247-GAL4; +                                                                    |
| S3          | c305a-GAL4>UAS-GFP                                          | c305a-GAL4, UAS-mCD8-GFP/CyO; Sb/TM3, Ser                                                        |
| S3          | R44E04-LexA>LexAop-GFP                                      | {R44E04-LexA}attP40/{LexAop2-mCD8-GFP}attP40/CyO; +; +                                           |
| S3          | R45H04-LexA>LexAop-GFP                                      | {R45H04-LexA}attP40/{LexAop2-mCD8-GFP}attP40/CyO; +; +                                           |
| S3          | MB247-GAL4>UAS-GFP<br>R45H04-LexA>LexAop-GAL80              | {R45H04-LexA}attP40/UAS-mCD8-GFP; mb247-GAL4/LexAop-GAL80; +                                     |
| S3          | MB247-GAL4> UAS-GCaMP6f<br>R44E04-LexA>LexAop-GAL80         | {R44E04-LexA}attP40/LexAop-GAL80, UAS-GCaMP6f; mb247-GAL4/+                                      |
| S3          | R12G04-LexA>LexAop-GFP                                      | {R12G04-LexA}attP40/LexAop2-mCD8-GFP; +; +                                                       |
